# Supplementary material for: Development of an economic model to assess the cost-effectiveness of hawthorn extract as an adjunct treatment for heart failure in Australia
Source: PubMed Central journal article supplement — BMJ Open. 2012 Sep 1;2(5):e001094. doi: 10.1136/bmjopen-2012-001094 (PMC3437431; doi:10.1136/bmjopen-2012-001094), 2012-09-01
Supplement: bmjopen-2012-001094.draft_revisions.pdf [file bmjopen-2012-001094.draft_revisions.pdf]

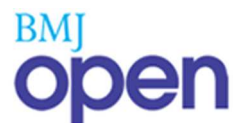

**Development of an Economic Model to Assess the Cost-Effectiveness of Hawthorn Extract as an Adjunct Treatment for Heart Failure in Australia**

|                                 |                                                                                                                                                                                            |
|---------------------------------|--------------------------------------------------------------------------------------------------------------------------------------------------------------------------------------------|
| Journal:                        | <i>BMJ Open</i>                                                                                                                                                                            |
| Manuscript ID:                  | bmjopen-2012-001094                                                                                                                                                                        |
| Article Type:                   | Research                                                                                                                                                                                   |
| Date Submitted by the Author:   | 01-Mar-2012                                                                                                                                                                                |
| Complete List of Authors:       | Ford, Emily; University of Queensland, School of Population Health<br>Adams, Jon; University of Technology Sydney, Faculty of Nursing, Midwifery and Health<br>Graves, Nicholas; QUT, IHBI |
| <b>Primary Subject Heading</b>: | Health economics                                                                                                                                                                           |
| Secondary Subject Heading:      | Complementary medicine, Cardiovascular medicine                                                                                                                                            |
| Keywords:                       | HEALTH ECONOMICS, Heart failure < CARDIOLOGY, COMPLEMENTARY MEDICINE                                                                                                                       |
|                                 |                                                                                                                                                                                            |

SCHOLARONE™  
Manuscripts

1  
2  
3  
4  
5  
6  
7  
8  
9  
10  
11  
12  
13  
14  
15  
16  
17  
18  
19  
20  
21  
22  
23  
24  
25  
26  
27  
28  
29  
30  
31  
32  
33  
34  
35  
36  
37  
38  
39  
40  
41  
42  
43  
44  
45  
46  
47  
48  
49  
50  
51  
52  
53  
54  
55  
56  
57  
58  
59  
60

## Development of an Economic Model to Assess the Cost-Effectiveness of Hawthorn Extract as an Adjunct Treatment for Heart Failure in Australia

Emily Ford  
School of Population Health  
University of Queensland  
Brisbane, Australia  
Postal address: PO Box 9122  
Wynnum Plaza Queensland 4178  
[emily.ford1@uqconnect.edu.au](mailto:emily.ford1@uqconnect.edu.au)  
Ph +61 (0)7 3901 1429

Professor Jon Adams  
Professor of Public Health  
Faculty of Nursing, Midwifery and Health  
University of Technology  
Sydney, Australia  
and  
Honorary Professor of Sociology  
School of Social Science  
University of Queensland  
Brisbane  
Australia  
[Jon.adams@uts.edu.au](mailto:Jon.adams@uts.edu.au)

Professor Nicholas Graves  
Professor of Health Economics  
School of Public Health and Institute for Health & Biomedical Innovation  
Queensland University of Technology  
Brisbane, Australia  
[n.graves@qut.edu.au](mailto:n.graves@qut.edu.au)

Keywords: complementary therapies, heart failure, cost-benefit analysis, crataegus extract

Word count: 3387

## ABSTRACT

### Objective

An economic model was developed to evaluate the cost-effectiveness of hawthorn extract as an adjunctive treatment for heart failure in Australia.

### Methods

A Markov model of chronic heart failure was developed using the New York Heart Association (NYHA) classification system. Classes I to IV make up the four health states. Patients may remain in the same NYHA class over time, experience an improvement of symptoms and an improvement in NYHA class, or a deterioration and worsening of NYHA class. Each NYHA class has its own decision tree. Within the decision tree some patients have been admitted to hospital and some have not, some will then die, and some will survive. Model inputs were derived from the published medical literature, and the output was Quality Adjusted Life Years (QALYs). Probabilistic Sensitivity Analysis was conducted. The Expected Value of Perfect Information (EVPI) and the Expected Value of Partial Perfect Information (EVPPI) were conducted to establish the value of further research and the ideal target for such research.

### Results

The new treatment increased costs by \$1866.78 and resulted in a gain of 0.02 QALYs. The incremental cost-effectiveness ratio was \$85,160.33 per QALY. The CEAC indicated at a threshold of \$40,000 the new treatment had a 0.29 probability of being cost-effective. The average incremental NMB was -\$1791.64, the average NMB for the standard treatment was \$92,067.49, and for the new treatment \$90,275.84. Additional research is potentially cost-effective if research is not proposed to cost more than \$325 million. Utilities is the most important target parameter group for further research.

### Conclusions

Hawthorn extract is not currently considered to be cost-effective in as an adjunctive treatment for heart failure in Australia. Further research in the area of utilities is warranted.

## INTRODUCTION

Heart failure is a major public health concern for all Western countries<sup>1</sup>. In the United States and Europe it is the most common principal diagnosis for adults admitted to hospital aged 65 years and over. In the United States around 2% of the population have heart failure (approximately 5 million people), and each year there are 500, 000 new cases diagnosed<sup>2</sup>. The estimated prevalence in Sweden is 1.5-2%, approximately 135, 000 to 180, 000 people<sup>3</sup>.

Australian data regarding the public health significance and epidemiology of heart failure is currently limited. Estimates rely on information from large-scale population studies conducted in the United States and Europe<sup>1</sup>. It is estimated there are approximately 300,000 Australians living with chronic heart failure, and approximately 30,000 new cases diagnosed each year, with incidence rates and prevalence rising significantly with age<sup>4,5</sup>. In Australia, chronic cardiovascular diseases are associated with health care costs of over five billion dollars, and estimates put the cost of heart failure at around one billion dollars<sup>6</sup>. The mortality, morbidity and health care costs of heart failure are therefore significant<sup>4</sup>.

Heart failure is a syndrome with a range of signs and symptoms, diagnosis is based on such signs and symptoms, including dyspnoea and fatigue, and appropriate investigations, such as echocardiogram, which confirm the presence or absence of heart failure and help determine its aetiology<sup>1</sup>.

Current treatment aims to relieve and stabilise symptoms and prolong survival by stopping, stabilizing or reversing the progression of heart failure<sup>7</sup>. There are a variety of strategies used in Australia, including non-pharmacological management, pharmacological management, lifestyle changes, and the use of supportive devices, surgery, and palliative care<sup>6,8</sup>. The pharmacological approach depends on the type of heart failure and extent of the symptoms.

Despite the availability of strategies to treat and manage the chronic disease, the disability and suffering associated with heart failure is devastating<sup>7</sup>. Given this, and the large economic burden, it is reasonable to examine options not currently

1  
2  
3 considered standard therapy. Research examining the use of complementary and  
4 alternative medicine, particularly the use of hawthorn extract is showing promising  
5 results.  
6  
7

8  
9  
10 Hawthorn extract is a popular herbal medicine used worldwide, particularly for its  
11 cardiovascular properties<sup>9</sup>. Hawthorn extract has positive inotropic, anti-  
12 inflammatory and anti-oxidative properties; causes peripheral and coronary  
13 vasodilation; and protects against ischaemia induced arrhythmias<sup>9</sup>. A recent  
14 systematic review concluded hawthorn extract can provide significant benefits to  
15 heart failure patients as an adjunct to conventional treatment and a recent cost-  
16 effectiveness study conducted in Germany concluded hawthorn is a cost-effective  
17 treatment option especially in the early stages of heart failure<sup>10-12</sup>.  
18  
19  
20  
21  
22  
23

24  
25 Economic evaluation is a structured method for examining the costs and  
26 consequences involved with alternative methods of treatments and/or programs, in  
27 order to inform which is the best alternative from a particular viewpoint<sup>13</sup>. The goal  
28 is to improve the use of health care resources and improve patient care<sup>14</sup>. When  
29 conducted rigorously, such formal analysis allows recommendation to be made with  
30 transparency regarding the methods, data sources and assumptions<sup>13</sup>. This further  
31 allows the process to be replicated, reviewed and even challenged.  
32  
33  
34  
35  
36

37  
38 Models allow complex situations to be organised into a single coherent form that can  
39 be used to make decisions based on comprehensive consideration of the alternative  
40 interventions by capturing the essential relationships between the factors included in  
41 the model and outcomes<sup>15 16</sup>. Markov models define diseases using clinically  
42 relevant and economically important health states, between which patients move  
43 based on the natural history of the disease, and to which cost and effectiveness  
44 outcomes are ascribed<sup>16</sup>.  
45  
46  
47  
48  
49

50  
51 The aim of this study was the construction and application of an economic decision  
52 model to evaluate hawthorn treatment as an adjunct to recommended pharmacological  
53 treatment versus recommended pharmacological management for chronic heart failure  
54 in Australia. The analysis has been conducted using a health sector perspective.  
55  
56  
57  
58  
59  
60

## METHODS

### Model Description

A four state Markov model of chronic heart failure was developed based on the New York Heart Association (NYHA) classification system using Microsoft Excel® (see Figure 1). Classes I to IV make up four discrete health states included in the model (See Table 1 for a description of the NYHA classes). A decision tree completes the model. Each NYHA class has its own decision tree. Within the decision tree patients could be hospitalised for worsening heart failure. Patients also either survived or died.

### Progression through the model

A simulated cohort of 1000 patients aged 60 entered the model with NYHA class II heart failure and progressed through the model. Patients progress through the model in one month cycles for a duration of 5 years. After one month, patients either remained in NYHA class II or improved to NYHA class I or deteriorated. In turn, for each class of heart failure patients were either hospitalised or not hospitalised for worsening heart failure. Patients who were hospitalised or not hospitalised either survived or died. Death was a possibility from any class of heart failure. The patients accrued costs and benefits of treatment in each of the states for each cycle.

Per patient costs were required for each NYHA class. Costs were assumed to be the same for standard treatment and standard treatment with hawthorn extract, except for the additional cost of hawthorn extract. Patient health was considered as a single index utility on a zero to one scale, where 0 represents death and 1 represents perfect health. This allows the calculation of Quality Adjusted Life Years (QALYs) when combined with the mortality data and the calculation of cost per QALY ratios.

Two cohorts were modeled, one receiving standard pharmacological treatment and the other receiving standard pharmacological treatment with hawthorn extract as an adjunct. The two cohorts will progress through the model in slightly different ways and as such there will be a difference in the accumulation of costs and QALYS. It is

the differences in costs and QALYs that will determine the cost-effectiveness of hawthorn extract in addition to standard pharmacological treatment.

A discount rate of 3% per year was applied to the costs and benefits. This rate is a standard choice in the literature.

**Table 1. NYHA grading of symptoms in chronic heart failure.**

| NYHA Class | Description                                                                                                                                   |
|------------|-----------------------------------------------------------------------------------------------------------------------------------------------|
| Class I    | No symptoms and limitations in ordinary physical activity.                                                                                    |
| Class II   | Slight limitation of physical activity. Ordinary physical activity results in mild symptoms such as fatigue, shortness of breath, and angina. |
| Class III  | Marked limitation of physical activity. Less than ordinary physical activity leads to symptoms.                                               |
| Class IV   | Severely limited. Experiences symptoms even at rest.                                                                                          |

### Model Construction

#### Disease Progression

Transition probabilities for movement between NYHA classes of heart failure were estimated from the published literature detailing the large scale international Study of the Effects of Nebivolol Intervention on Outcomes and Re-hospitalisation in Seniors with Heart Failure (SENIORS) and personal correspondence with authors<sup>17 18</sup>. A thorough literature search was conducted to identify disease progression data for each NYHA class. The search yielded a limited number of studies, of which only one was considered suitable for inclusion.

Disease progression between the Markov states was assumed to be the same for standard treatment and for standard treatment with hawthorn extract, as we were unable to identify any data to indicate that hawthorn extract altered progression through the classes of heart failure. We have incorporated a difference in mortality and a difference in the hospitalisation rate between the standard treatment and the standard treatment with hawthorn extract as an adjunct, which in turn will impact on the cost and QALY outcomes.

### Data Sources

## Mortality

Baseline mortality was derived from Australian Bureau of Statistics general population mortality data.

The mortality rate for cardiovascular causes was derived from the published literature detailing one year mortality among unselected patients with NYHA class II-IV heart failure in Switzerland<sup>19</sup>. The mortality rate increased with progression from NYHA class I to NYHA class IV, and varied depending on whether the patient was hospitalised or not. A thorough search of the literature was made to identify data for each NYHA class individually, nothing was identified and the above study was the closest to ideal. Hospitalisation was considered a major factor in cost estimation, so data broken down by hospitalisation status was considered to represent the population of heart failure patients well. Also, unselected patients were considered to represent the patient cohort more accurately than studies that focused on hospitalised patients only. As data for NYHA class I was not included, an assumption was made that mortality for NYHA class I was the same as the general population mortality.

## Health Status

Estimates of health status were derived from the same source as the transition probabilities<sup>17,20</sup>. Data concerning utilities for heart failure is extremely limited, a study was identified that had specifically had developed utilities for heart failure in terms of both hospitalisation and NYHA class. However, we were unable to obtain the required data despite personal correspondence with the authors. The estimated health status used was considered the next best data source.

Health status was assumed to be the same for standard treatment and standard treatment with hawthorn extract. Hospitalisation was assumed to result in a health state lower than non-hospitalisation and a -0.1 disutility was applied to hospitalisation to reflect this.

## Effect of Hawthorn

The relative risk of mortality and relative risk of hospitalisation with hawthorn extract was derived from the Survival and Prognosis: Investigation of Crataegus Extract WS 1442 in congestive heart failure (SPICE) trial, a large scale, international, randomised, placebo-controlled, double-blind study designed to investigate the influence of hawthorn extract on mortality of patients with congestive heart failure NYHA class II



1  
2  
3 and III with at least moderately impaired left ventricular function<sup>21</sup>. To date there  
4 have only been two studies to examine the effect of hawthorn extract on heart failure  
5 progression in terms of mortality and hospitalisation. Most studies have focused on  
6 symptoms and exercise capability. SPICE enrolled nearly 3000 patients, and the  
7 Hawthorn Extract Randomised Blinded Chronic Heart Failure (HERB CHF) trial  
8 enrolled 120 patients<sup>22 23</sup>. Meta-analysis was not considered appropriate, therefore  
9 the data from SPICE was incorporated into the model.  
10  
11  
12  
13

#### 14 15 16 Costs

17 No Australian data was available to estimate the hospitalisation rate and number of  
18 hospitalisations, this information was derived from a United States study<sup>24</sup>.  
19 The estimated length of stay in hospital data was obtained from Victorian Department  
20 of Health for 2010-2011, it was unavailable for each NYHA class, so it was assumed  
21 to be the same for all classes<sup>25</sup>.  
22

23 The cost of a hospital admission per day was derived from the Queensland  
24 Government/ Queensland Health Casemix Funding Model 2008-2009 Component  
25 Prices Summary<sup>26</sup>.  
26

27 Outpatient costs included General Practitioner (GP) visits, pathology,  
28 echocardiograms, and specialist visits. Estimates of the number of GP and specialist  
29 visits came from a combination of Australian sources and overseas studies due to the  
30 difficulty in finding complete Australian estimates. The costs came directly from the  
31 Medicare Benefits Schedule and the Queensland Government/ Queensland Health  
32 Casemix Funding Model 2008-2009 Component Prices Summary<sup>26 27</sup>.  
33

34 The information for which medications are taken for each NYHA class have been  
35 taken from the National Heart Foundation guidelines for the treatment of chronic  
36 heart failure in Australia<sup>5</sup>. Information for the optimal dosages prescribed has been  
37 taken from the Australian Therapeutic Guidelines. Individual drug pricing was  
38 obtained from the most recently available online version of the Medicare Benefits  
39 Schedule. The initial version of the model has incorporated the assumption that  
40 medications are taken in 100% of patients and that dosing is optimal. The model  
41 however can be altered to consider different scenarios of medication prescription and  
42 consumption.  
43  
44  
45  
46  
47  
48  
49  
50  
51  
52  
53  
54  
55

56 The dosage was assumed to be 900mg daily, consistent with the dosage used in the  
57 two most recent trials of hawthorn extract, the SPICE trial and the HERB-CHF trial<sup>21</sup>  
58  
59  
60

<sup>23 28</sup>. An online search was conducted for standardised monopreparations of hawthorn leaf with flower available for purchase.

The model parameters have been listed in Table 2.

**Table 2. Parameters used in the Decision Model**

| Parameter Description                     | Baseline Estimate | Variation/ SE (SD) | Distribution                               | Reference     |
|-------------------------------------------|-------------------|--------------------|--------------------------------------------|---------------|
| <b>Transition Probabilities</b>           |                   | n/a                | Dirichlet (Refer to Appendix 1 for method) | <sup>17</sup> |
| Stable NYHA class I                       | 0.977             |                    |                                            |               |
| Deteriorate NYHA class I to II            | 0.019             |                    |                                            |               |
| Deteriorate NYHA class I to III           | 0.004             |                    |                                            |               |
| Stable NYHA class II                      | 0.981             |                    |                                            |               |
| Improve NYHA class II to I                | 0.008             |                    |                                            |               |
| Deteriorate NYHA class II to III          | 0.010             |                    |                                            |               |
| Deteriorate NYHA class II to IV           | 0.001             |                    |                                            |               |
| Stable NYHA class III                     | 0.960             |                    |                                            |               |
| Improve NYHA class III to II              | 0.034             |                    |                                            |               |
| Deteriorate NYHA class III to IV          | 0.006             |                    |                                            |               |
| Stable NYHA class IV                      | 0.945             |                    |                                            |               |
| Improve NYHA class IV to III              | 0.055             |                    |                                            |               |
| <b>Hospitalisation</b>                    |                   | n/a                | n/a                                        | <sup>24</sup> |
| probability for hospitalisation Class I   | 0.01518800        |                    |                                            |               |
| probability no hospitalisation Class I    | 0.98481200        |                    |                                            |               |
| probability for hospitalisation Class II  | 0.02397800        |                    |                                            |               |
| probability no hospitalisation Class II   | 0.97602200        |                    |                                            |               |
| probability for hospitalisation Class III | 0.02397800        |                    |                                            |               |
| probability no hospitalisation Class III  | 0.97602200        |                    |                                            |               |

|                                                                |              |                          |                    |                     |
|----------------------------------------------------------------|--------------|--------------------------|--------------------|---------------------|
| Class III                                                      |              |                          |                    |                     |
| probability for hospitalisation Class IV                       | 0.15397000   |                          |                    |                     |
| probability no hospitalisation Class IV                        | 0.84603000   |                          |                    |                     |
| <b>Length of stay in hospital estimate</b>                     | 4.9 days     | Alpha 0.1<br>Beta 316.81 | Gamma              | <sup>25</sup>       |
| <b>Relative Risk of Hospitalisation with Hawthorn Extract</b>  | 1.03651200   | 0.080800494              | Lognormal          | <sup>28</sup>       |
| <b>Costs</b>                                                   |              | n/a                      | n/a                | <sup>26 27 29</sup> |
| Cost of hospitalisation NYHA class I                           | \$2,957.08   |                          |                    |                     |
| Cost of hospitalisation NYHA class II                          | \$4,435.63   |                          |                    |                     |
| Cost of hospitalisation NYHA class III                         | \$4,435.63   |                          |                    |                     |
| Cost of hospitalisation NYHA class IV                          | \$5,914.17   |                          |                    |                     |
| Total cost of NYHA class I with hospitalisation                | \$3,141.60   |                          |                    |                     |
| Total cost of NYHA class II with hospitalisation               | \$4,639.95   |                          |                    |                     |
| Total cost of NYHA class III with hospitalisation              | \$4,684.53   |                          |                    |                     |
| Total cost of NYHA class IV with hospitalisation               | \$6,176.17   |                          |                    |                     |
| Cost of NYHA class I no hospitalisation                        | \$130.30     |                          |                    |                     |
| Cost of NYHA class II no hospitalisation                       | \$150.11     |                          |                    |                     |
| Cost of NYHA class III no hospitalisation                      | \$194.69     |                          |                    |                     |
| Cost of NYHA class IV no hospitalisation                       | \$207.79     |                          |                    |                     |
| <b>Mortality</b>                                               |              |                          |                    |                     |
| <b>Standardised Death Rate</b>                                 | 6.0 per 1000 | n/a                      | n/a                | <sup>30</sup>       |
| <b>Excess Mortality</b>                                        |              |                          | Beta               | <sup>19</sup>       |
| probability of excess mortality given hospitalisation class II | 0.01087776   | Alpha<br>0.35916667      | Beta<br>2.55750000 |                     |

|                                                                    |             |                     |                    |               |
|--------------------------------------------------------------------|-------------|---------------------|--------------------|---------------|
| probability of excess mortality given no hospitalisation class II  | 0.002620782 | Alpha<br>0.43166667 | Beta<br>13.485000  |               |
| probability of excess mortality given hospitalisation class III    | 0.01791369  | Alpha<br>0.79666667 | Beta<br>3.28666667 |               |
| probability of excess mortality given no hospitalisation class III | 0.00674466  | Alpha<br>0.72833333 | Beta<br>8.60500000 |               |
| probability of excess mortality given hospitalisation class IV     | 0.05333974  | Alpha<br>0.96416667 | Beta<br>1.03583333 |               |
| probability of excess mortality given no hospitalisation class IV  | 0.00719464  | Alpha<br>0.16583333 | Beta<br>1.83416667 |               |
| <b>Relative Risk of Mortality with Hawthorn Extract</b>            | 0.90336300  | 0.09507420          | Lognormal          | <sup>28</sup> |
| <b>Utility</b>                                                     |             |                     | Beta               | <sup>17</sup> |
| Utility of NYHA class I no hospitalisation                         | 0.815       | Alpha 395.88        | Beta 89.86         |               |
| Utility of NYHA class II no hospitalisation                        | 0.72        | Alpha 661.95        | Beta 257.42        |               |
| Utility of NYHA class III no hospitalisation                       | 0.59        | Alpha 359.8075      | Beta 250.0357      |               |
| Utility of NYHA class IV no hospitalisation                        | 0.508       | Alpha 51.77         | Beta 50.1394       |               |

### Probabilistic Sensitivity Analysis

Uncertainty is addressed in the model using probabilistic sensitivity analysis.

Statistical distributions were assigned to key model parameters to examine second-order uncertainty in the estimation of the parameter. Uncertainty was propagated through the model using Monte Carlo simulation, drawing parameter values at random 1000 times from the particular distributions. This generates a joint density of cost and QALY outcomes that summaries uncertainties in all model parameters.

### Net Monetary Benefit

1  
2  
3 The incremental net monetary benefit was calculated. The difference between the  
4 average net benefit of the standard treatment and the average net benefit of the  
5 standard treatment with hawthorn as an adjunct is equal to the incremental net benefit.  
6  
7 The net benefit for each treatment is the increase in effectiveness multiplied by the  
8 amount the decision maker is willing to pay per QALY (\$40,000), less the increase in  
9  
10 cost.  
11  
12

### 13 14 15 **The Expected Value of Perfect Information/ Expected Value of Partial Perfect** 16 **Information (EVPI/ EVPPI)** 17

18 The results of the modeling will indicate whether, based on the currently available  
19 information, the new treatment should be recommended. This decision is always  
20 associated with a level of uncertainty, which raises the question of whether it is  
21 appropriate to conduct further research to better examine the potential value of the  
22 new treatment, and whether we can identify where this research needs to be directed.  
23 EVPI and EVPPI analysis have been used to address these questions.  
24  
25  
26  
27

28  
29 EVPI analysis is a combination of the cost of making the wrong decision in terms of  
30 forgone health benefit and wasted resources, and the probability of making a wrong  
31 decision. This equates to the expected cost of uncertainty. With all uncertainty  
32 removed there would be economic savings from making the best decision and EVPI is  
33 a monetary value of these savings. EVPI provides an upper bound for spending on  
34 further research that reduces uncertainty in the decision. EVPPI follows the same  
35 principles, but examines individual parameters<sup>31</sup>.  
36  
37  
38  
39  
40  
41  
42

43 For the model it has been assumed the life of technology is 10 years and the number  
44 of eligible patients per annum has been estimated at 30, 000. This estimate is derived  
45 from the estimate of 30, 000 new cases of chronic heart failure per annum.  
46  
47  
48

## 49 **RESULTS**

50 For the standard treatment and standard treatment with hawthorn extract as an adjunct  
51 the total cost per patient was \$4,887.82 and \$6754.59 QALYs were 2.40 and 2.42  
52 respectively. This was an incremental cost of \$1866.78 and 0.02 QALYs, and the  
53 incremental cost-effectiveness ratio was \$85,160.33 per QALY. A Cost-  
54  
55  
56  
57  
58  
59  
60

1  
2  
3 Effectiveness Plane shows the joint density of cost and QALY outcomes from the  
4 Monte Carlo simulations (See Appendix 2). The variation in the model parameters  
5 can be seen in a series of histograms for each of the probabilistic parameters (See  
6 Appendix 3).  
7  
8  
9

### 10 11 **Cost-Effectiveness Acceptability Curve (CEAC)**

12 Figure 2 shows the uncertainty around this estimate as a cost-effectiveness  
13 acceptability curve (CEAC). At a willingness to pay threshold of \$40,000, the new  
14 treatment has a 0.29 probability of being cost-effective. The probability of being cost  
15 effective rises as the willingness to pay threshold rises, for a threshold between  
16 \$500,000 and \$1,000,000 the probability is 0.48.  
17  
18  
19  
20  
21

### 22 **Net Monetary Benefit (NMB)**

23 For a threshold of \$40,000, the average incremental NMB is -\$1791.64, the average  
24 NMB for the standard treatment is \$92,067.49, and for the new treatment \$90,275.84.  
25 The new intervention has a negative incremental net benefit, and would not offer  
26 good value for money for a decision maker.  
27  
28  
29  
30  
31

### 32 **Expected Value of Perfect Information (EVPI)**

33 The population EVPI has been plotted in Figure 3 for a cost-effectiveness threshold  
34 between \$0 and \$200, 000 per QALY. The threshold was continued in the analysis up  
35 to a threshold of \$500,000 per QALY, however this did not alter the slope of the  
36 curve, so the results up to \$200, 000 have been shown.  
37  
38  
39  
40  
41

42 If the population EVPI represented in Figure 3 exceeds the expected costs of  
43 additional research, then it is potentially cost-effective to conduct further research.  
44  
45  
46

47 At a threshold of \$40,000 additional research is potentially cost-effective if research is  
48 not proposed to cost more than \$325 million.  
49  
50  
51

52 If we proposed additional research would cost \$100 million, it can be seen from  
53 Figure 3 that this research would be potentially cost-effective at a threshold of just  
54 under \$16,000. Even at a threshold of \$0 per QALY research would potentially be  
55 cost-effective as long as the cost of research did not exceed \$15 million.  
56  
57  
58  
59  
60

The EVPI has indicated further research is potentially cost-effective. The Expected Value of Partial Perfect Information (EVPPPI) was examined to establish where further research would be of most benefit.

### **The Expected Value of Partial Perfect Information (EVPPPI)**

The EVPPPI was examined for six parameters/ groups of parameters, Transitions, Average Length of stay, Excess Mortality (cardiovascular mortality), Relative Risk of Hawthorn, Utilities, and the Relative Risk of Hospitalisation.

The results of the EVPPPI analysis can be seen in Figure 4 (and Table 3). From both the table and figure it can be seen that all parameters and parameter groups have significant EVPPPI, but the impact varies. Utilities (\$439,471,050.98) has the highest EVPPPI, and is therefore the most important target parameter/ parameter group for further research.

**Table 3. Partial EVPI Values for Parameters/ Parameter Groups**

| Parameters                    | Partial EVPI     |
|-------------------------------|------------------|
| Transitions                   | \$7,153,571.92   |
| Average Length of stay        | \$96,900,062.41  |
| Excess Mortality              | \$105,833,952.26 |
| Relative Risk Hawthorn        | \$86,323,972.20  |
| Utilities                     | \$439,471,050.98 |
| Relative Risk Hospitalisation | \$56,991,399.70  |

## **DISCUSSION**

In this modelling study we examined the cost-effectiveness of hawthorn extract in addition to standard treatment for heart failure in Australia. This treatment is not considered cost-effective given the current evidence. This is the first known attempt to examine the cost-effectiveness of hawthorn extract in addition to standard pharmacological treatment of chronic heart failure in Australia.

1  
2  
3 EVPI analysis indicated that further research was likely to be of benefit, and EVPPI  
4 analysis indicated that research ideally should be targeted toward Utilities. The  
5 potential costs of further research and the particular type or types that may be required  
6 are of crucial importance to the final decision. Further research to examine Utilities  
7 will likely rely on primary data from randomized controlled trials such as the  
8 Eplerenone Post-acute Myocardial Infarction Heart Failure Efficacy and Survival  
9 Study (EPHESUS) and the Study of the Effects of Nebivolol Intervention on  
10 Outcomes and Rehospitalisation in Seniors with Heart Failure Study (SENIORS)<sup>17 32</sup>.  
11 Alternatively such research would require the initiation of novel research with utilities  
12 as a main outcome. This is costly research and this would certainly need to be  
13 estimated before any research was undertaken.  
14  
15  
16  
17  
18  
19  
20  
21  
22

23 A limitation of this study was the relatively sparse data available for the Australian  
24 context. There is scarce data on the incidence and prevalence of heart failure.  
25 Estimates rely on information from a small number of large-scale population studies  
26 conducted in the United States and Europe<sup>1</sup>. The study of mortality in Australia is  
27 complex, heart failure is considered a 'mode of death' not a 'cause of death'. Studies  
28 examining mortality in terms of the underlying cause of death risk underestimating  
29 mortality with condition such as heart failure. Mortality statistics are complicated by  
30 multiple co-morbidities, which make the underlying cause of death difficult to  
31 identify. Lack of consensus about the diagnosis of heart failure also complicates  
32 recording of the cause of death, indeed complicating any examination of heart failure.  
33 It is difficult to isolate costs for heart failure. Heart failure is grouped by the  
34 Australian Institute of Health and Welfare as an 'other cardiovascular disease'. The  
35 exact contribution of heart failure to the burden of cardiovascular disease is at best an  
36 estimate.  
37  
38  
39  
40  
41  
42  
43  
44  
45  
46  
47

48 Another limitation was the availability of evidence of the effectiveness of hawthorn  
49 extract. There are numerous studies supporting its use, however, very few studies that  
50 examine final outcomes such as hospitalisation and mortality. Previously conducted  
51 studies focus on reported outcomes including maximal workload, exercise tolerance,  
52 pressure-heart rate product, 6-min walk test, and left-ventricular ejection fraction.  
53 There are suggestions in the literature that the use of hawthorn extract can actually  
54 decrease the use of standard pharmacological therapy and alter the progression of  
55  
56  
57  
58  
59  
60



1  
2  
3 heart failure, but little rigorous evidence to support this <sup>10</sup>. If such evidence was  
4 available this would change the costs and benefits of hawthorn extract, and potentially  
5 change the cost-effectiveness of hawthorn extract as an adjunct to standard  
6 pharmacological treatment.  
7  
8  
9

10  
11 Should further evidence become available, the model can easily be updated and the  
12 results re-examined.  
13

## 14 15 **CONCLUSION**

16  
17 Our analysis indicates that based on currently available evidence, hawthorn extract is  
18 not cost-effective in addition to standard pharmacological treatment for chronic heart  
19 failure in Australia. EVPI and EVPPi analysis indicates that further research is  
20 warranted, particularly in the area of utilities, pending an assessment of the estimated  
21 costs of such research.  
22  
23  
24  
25  
26  
27

28 **Funding** This research received no specific grant from any funding agency in the  
29 public, commercial or not-for-profit sectors.  
30  
31

32  
33 **Competing Interests** None.  
34  
35

36  
37 **Contributors** EF carried out the data collection and economic analysis. EF was  
38 responsible for the original draft. All authors contributed equally to all other aspects  
39 including drafting and revising, and approved the final manuscript.  
40  
41  
42  
43  
44  
45  
46  
47  
48  
49  
50  
51  
52  
53  
54  
55  
56  
57  
58  
59  
60

## REFERENCES

1. Krum H, Stewart S. Chronic heart failure: time to recognise this major public health problem. *Med J Aust* 2006;184:147-48.
2. McLean AS, Eslick GD, Coats AJS. The epidemiology of heart failure in Australia. *Int J Cardiol* 2007;118:370-74.
3. Agvall B, Borgquist L, Foldevi M, Dahlstrom U. Cost of heart failure in Swedish primary healthcare. *Scand J Prim Health* 2005;23:227-32.
4. Australian Institute of Health and Welfare. Heart failure: what of the future? Cat. No. AUS 34. Canberra: AIHW, 2003.
5. National Heart Foundation of Australia and the Cardiac Society of Australia and New Zealand (Chronic Heart Failure Guidelines Expert Writing Panel). Guidelines for the prevention, detection and management of chronic heart failure in Australia, 2006., 2006.
6. Krum H, Jelinek MV, Stewart S, *et al.* Guidelines for the prevention, detection and management of people with chronic heart failure in Australia in 2006. *Med J Aust* 2006;185:549-56.
7. Kaye DM, Krum H. Drug discovery for heart failure: a new era or the end of the pipeline? *Nat Rev Drug Discov* 2007;6:127-39.
8. Quinn B. Pharmacological treatment of heart failure. *Crit Care Nurs Q* 2007;30:299-306.
9. Furey A, Tassell M. Towards a scientific approach in the assessment of efficacy of an herbal preparation: hawthorn (*Crataegus* spp.). *Eur J Heart Fail* 2008;10:1153-57.

- 1  
2  
3 10. Habs M. Prospective, comparative cohort studies and their contribution to the  
4  
5 benefit assessments of therapeutic options: heart failure treatment with and  
6  
7 without hawthorn special extract WS 1442. *Forsch Komp Klas Nat*  
8  
9 2004;11:36-39.
- 10  
11 11. Pittler MH, Schmidt K, Ernst E. Hawthorn extract for treating chronic heart  
12  
13 failure: meta-analysis of randomised trials. *Am J Med* 2003;114:665-74.
- 14  
15 12. Guo R, Pittler MH, Ernst E. Hawthorn extract for treating chronic heart failure  
16  
17 (Review). *Cochrane Database Syst Rev* 2009; Issue 1. Art No: CD005312.  
18  
19 DOI: 10.1002/14651858.CD005312.pub2.
- 20  
21 13. Griffin S, Claxton K, Sculpher M. Decision analysis for resource allocation in  
22  
23 health care. *J Health Serv Res Po* 2008; 13:23-30.
- 24  
25 14. Kymes S. An introduction to decision analysis in the economic evaluation of the  
26  
27 prevention and treatment of vision-related diseases. *Ophthal Epidemiol*  
28  
29 2008;15:76-83.
- 30  
31 15. Buxton MJ, Drummond MF, Van Hout BA, *et al.* Modelling in economic  
32  
33 evaluation: an unavoidable fact of life. *Health Econ* 1997;6:217-27.
- 34  
35 16. Spencer M, Briggs A, Grossman R, *et al.* Development of an economic model to  
36  
37 assess the cost effectiveness of treatment interventions for chronic obstructive  
38  
39 pulmonary disease. *Pharmacoeconomics* 2005;23:619-37.
- 40  
41 17. Yao G, Freemantle N, Flather M, *et al.* Long-term cost-effectiveness analysis of  
42  
43 nebivolol compared with standard care in elderly patients with heart failure: an  
44  
45 individual patient-based simulation model. *Pharmacoeconomics* 2008;26:879-  
46  
47 89.
- 48  
49  
50  
51  
52  
53  
54  
55  
56  
57  
58  
59  
60

- 1  
2  
3 18. Flather M, Shibata M, Coats A, *et al.* Randomised trial to determine the effect of  
4  
5 nebivolol on mortality and cardiovascular hospital admission in elderly  
6  
7 patients with heart failure (SENIORS). *Eur Heart J* 2005;26:215-25.  
8  
9  
10 19. Muntwyler J, Abetel G, Gruner C, *et al.* One-year mortality among unselected  
11  
12 outpatients with heart failure. *Eur Heart J* 2002;23:1861-66.  
13  
14 20. Yao G, Freemantle N, Calvert M, *et al.* The long-term cost-effectiveness of  
15  
16 cardiac resynchronization therapy with or without an implantable cardioverter-  
17  
18 defibrillator. *Eur Heart J* 2007;28:42-51.  
19  
20  
21 21. Holubarsch CJF, Colucci WS, Meinertz T, *et al.* Survival and prognosis:  
22  
23 investigation of crataegus extract WS 1442 in congestive heart failure (SPICE)  
24  
25 - rationale, study design and study protocol. *Eur J Heart Fail* 2000;2:431-37.  
26  
27  
28 22. Zick S, Gillespie B, Aaronson K. The effect of crataegus oxycantha special extract  
29  
30 WS 1442 on clinical progression in patients with mild to moderate symptoms  
31  
32 of heart failure. *Eur J Heart Fail* 2008;10:587-93.  
33  
34  
35 23. Zick S, Vautaw B, Gillespie B, *et al.* Hawthorn extract randomised blinded  
36  
37 chronic heart failure (HERB-CHF) trial. *Eur J Heart Fail* 2009;11:990-99.  
38  
39  
40 24. Cowper PA, DeLong ER, Whellan DJ, *et al.* Economic effects of beta-blocker  
41  
42 therapy in patients with heart failure. *Am J Med* 2004;116:104-11.  
43  
44  
45 25. Victorian Department of Health. Victorian health services policy and funding  
46  
47 guidelines 2010-11 technical guidelines. Melbourne: Victorian Department of  
48  
49 Health, 2010.  
50  
51 26. Queensland Health. Casemix funding model 2008-2009: component prices  
52  
53 summary. Brisbane: Queensland Government, 2008.  
54  
55  
56  
57  
58  
59  
60

- 1  
2  
3 27. Australian Government Department of Health and Ageing. Medicare Benefits  
4  
5 Schedule (MBS) online. Canberra: Australian Government Department of  
6  
7 Health and Ageing, 2010.  
8  
9  
10 28. Holubarsch CJF, Colucci WS, Meinertz T, *et al.* The efficacy and safety of  
11  
12 crataegus extract WS 1442 in patients with heart failure: the SPICE trial. *Eur J*  
13  
14 *Heart Fail* 2008;10:1255-63.  
15  
16 29. Australian Government Department of Health and Ageing. Schedule of  
17  
18 pharmaceutical benefits. Canberra: Australian Government Department of  
19  
20 Health and Ageing, 2010.  
21  
22  
23 30. Australian Bureau of Statistics. 3302.0 - Deaths, Australia, 2008, 2008.  
24  
25 31. Drummond MF, Sculpher MJ, Torrance GW, *et al.* *Methods for the economic*  
26  
27 *evaluation of health care programmes*. Third ed. Oxford: Oxford University  
28  
29 Press, 2007.  
30  
31  
32 32. Gohler A, Geisler BP, Manne J, *et al.* Utility estimates for decision-analytic  
33  
34 modelling in chronic heart failure: health states based on New York heart  
35  
36 association classes and number of rehospitalisations. *Value Health*  
37  
38 2009;12:185-87.  
39  
40  
41  
42  
43  
44  
45  
46  
47  
48  
49  
50  
51  
52  
53  
54  
55  
56  
57  
58  
59  
60

1  
2  
3  
4  
5  
6  
7  
8  
9  
10  
11  
12  
13  
14  
15  
16  
17  
18  
19  
20  
21  
22  
23  
24  
25  
26  
27  
28  
29  
30  
31  
32  
33  
34  
35  
36  
37  
38  
39  
40  
41  
42  
43  
44  
45  
46  
47  
48  
49  
50  
51  
52  
53  
54  
55  
56  
57  
58  
59  
60

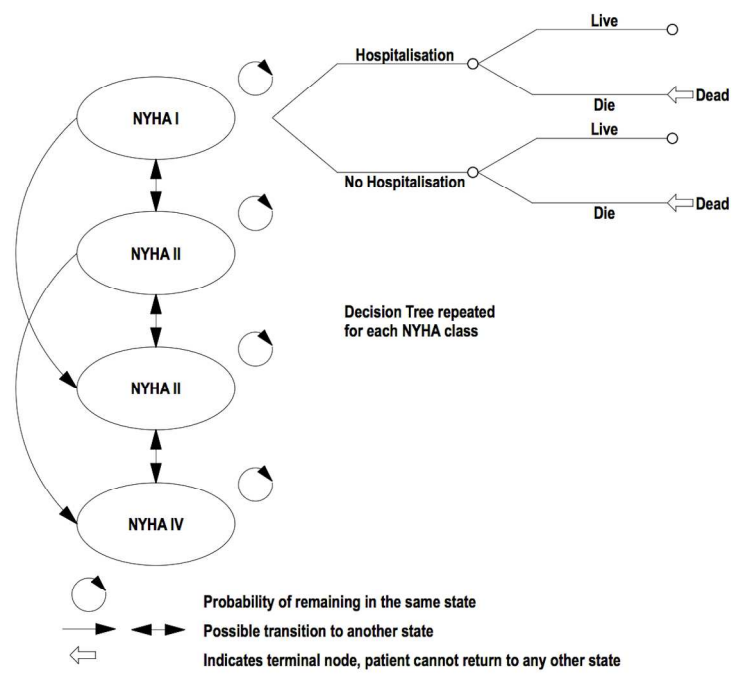

Figure 1. Markov model and decision tree showing transitions between potential health states for chronic heart failure.

451x317mm (300 x 300 DPI)

View only

1  
2  
3  
4  
5  
6  
7  
8  
9  
10  
11  
12  
13  
14  
15  
16  
17  
18  
19  
20  
21  
22  
23  
24  
25  
26  
27  
28  
29  
30  
31  
32  
33  
34  
35  
36  
37  
38  
39  
40  
41  
42  
43  
44  
45  
46  
47  
48  
49  
50  
51  
52  
53  
54  
55  
56  
57  
58  
59  
60

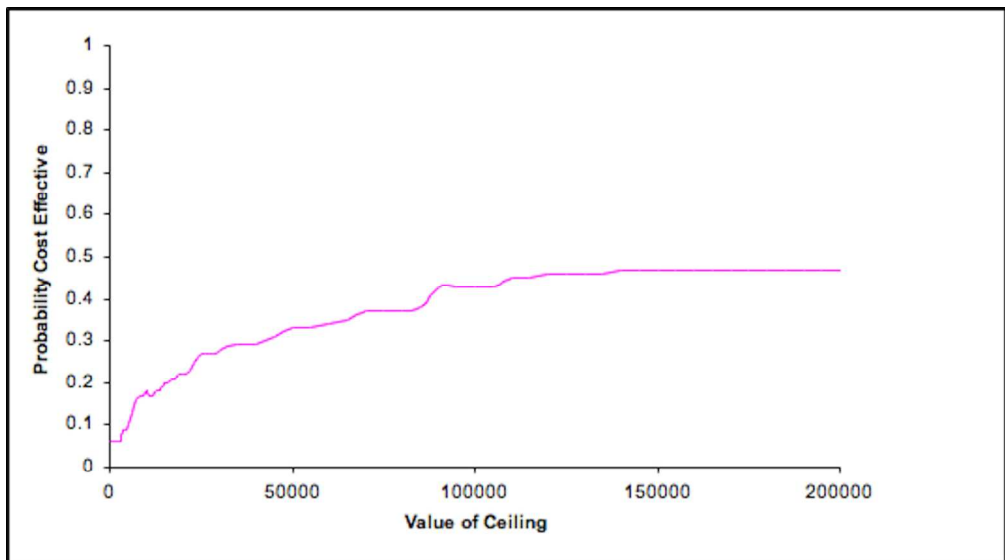

Figure 1. Cost-Effectiveness Acceptability Curve for the New Intervention  
162x90mm (300 x 300 DPI)

review only

1  
2  
3  
4  
5  
6  
7  
8  
9  
10  
11  
12  
13  
14  
15  
16  
17  
18  
19  
20  
21  
22  
23  
24  
25  
26  
27  
28  
29  
30  
31  
32  
33  
34  
35  
36  
37  
38  
39  
40  
41  
42  
43  
44  
45  
46  
47  
48  
49  
50  
51  
52  
53  
54  
55  
56  
57  
58  
59  
60

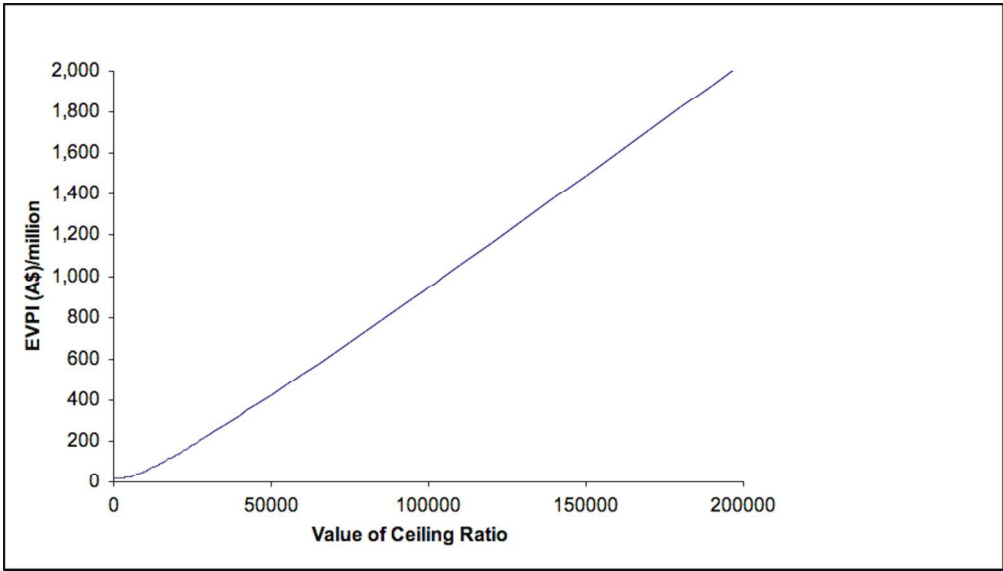

Figure 1. Population Expected Value of Perfect Information (EVPI) Curve  
Note. The EVPI values have been divided by 1 million to make figure easier to read.

161x91mm (300 x 300 DPI)

Review only



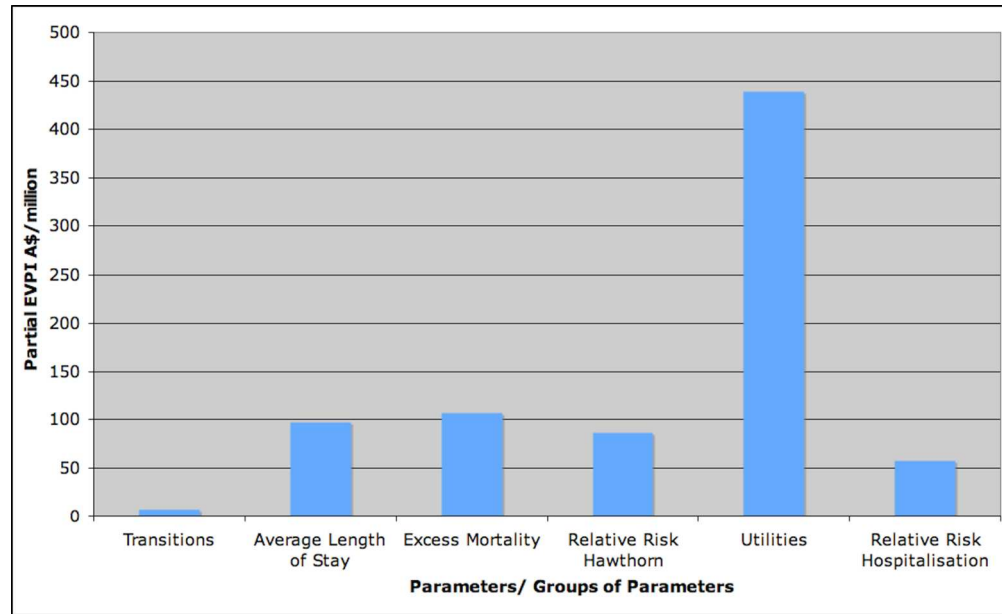

Figure 1. Expected Value of Perfect Information for Parameters

Note. The Partial EVPI values have been divided by 1 million to make figure easier to read.

149x91mm (300 x 300 DPI)

## Appendix 1. Calculation of the Transition Probabilities for the Markov Model

| <i>transition matrix</i> | NYHA I | NYHA II | NYHA III | NYHA IV | Check |
|--------------------------|--------|---------|----------|---------|-------|
| NYHA I                   | 0.977  | 0.019   | 0.004    | 0.000   | 1.000 |
| NYHA II                  | 0.008  | 0.981   | 0.010    | 0.001   | 1.000 |
| NYHA III                 | 0.000  | 0.034   | 0.960    | 0.006   | 1.000 |
| NYHA IV                  | 0.000  | 0.000   | 0.055    | 0.945   | 1.000 |
|                          |        |         |          |         | 0.000 |

Probabilistic version

### 1. Observed counts

|          | NYHA I | NYHA II | NYHA III | NYHA IV | totals |
|----------|--------|---------|----------|---------|--------|
| NYHA I   | 59.597 | 1.159   | 0.244    | 0       | 61     |
| NYHA II  | 9.6    | 1177.2  | 12       | 1.2     | 1200   |
| NYHA III | 0      | 28.016  | 791.04   | 4.944   | 824    |
| NYHA IV  | 0      | 0       | 2.365    | 40.635  | 43     |
|          |        |         |          |         | 2128   |

### 2. Estimated probabilities

|          | NYHA I | NYHA II | NYHA III | NYHA IV | totals |
|----------|--------|---------|----------|---------|--------|
| NYHA I   | 0.977  | 0.019   | 0.004    | 0       | 1      |
| NYHA II  | 0.008  | 0.981   | 0.010    | 0.001   | 1      |
| NYHA III | 0      | 0.034   | 0.960    | 0.006   | 1      |
| NYHA IV  | 0      | 0       | 0.055    | 0.945   | 1      |

### 3. Random number table

|          | NYHA I | NYHA II | NYHA III | NYHA IV |
|----------|--------|---------|----------|---------|
| NYHA I   | 0.24   | 0.44    | 0.87     | 0.66    |
| NYHA II  | 0.91   | 0.62    | 0.99     | 0.21    |
| NYHA III | 0.72   | 0.91    | 0.27     | 0.46    |
| NYHA IV  | 0.26   | 0.18    | 0.92     | 0.46    |

### 4. Cumulative gamma/normal functions

|          | NYHA I | NYHA II  | NYHA III | NYHA IV | totals |
|----------|--------|----------|----------|---------|--------|
| NYHA I   | 53.905 | 0.730    | 0.568    | 0       | 55     |
| NYHA II  | 13.845 | 1188.106 | 20.983   | 0.342   | 1223   |
| NYHA III | 0      | 35.377   | 773.741  | 4.390   | 814    |
| NYHA IV  | 0      | 0        | 4.735    | 39.593  | 44     |

### 5. Random dirichlet probabilities

|          | NYHA I | NYHA II | NYHA III | NYHA IV | totals |
|----------|--------|---------|----------|---------|--------|
| NYHA I   | 0.976  | 0.013   | 0.010    | 0       | 1.00   |
| NYHA II  | 0.011  | 0.971   | 0.017    | 0.000   | 1.00   |
| NYHA III | 0      | 0.043   | 0.951    | 0.005   | 1.00   |
| NYHA IV  | 0      | 0       | 0.107    | 0.893   | 1.00   |

**Appendix 2. Cost-Effectiveness Plane Showing Cost and QALY Outcomes for Markov Model**

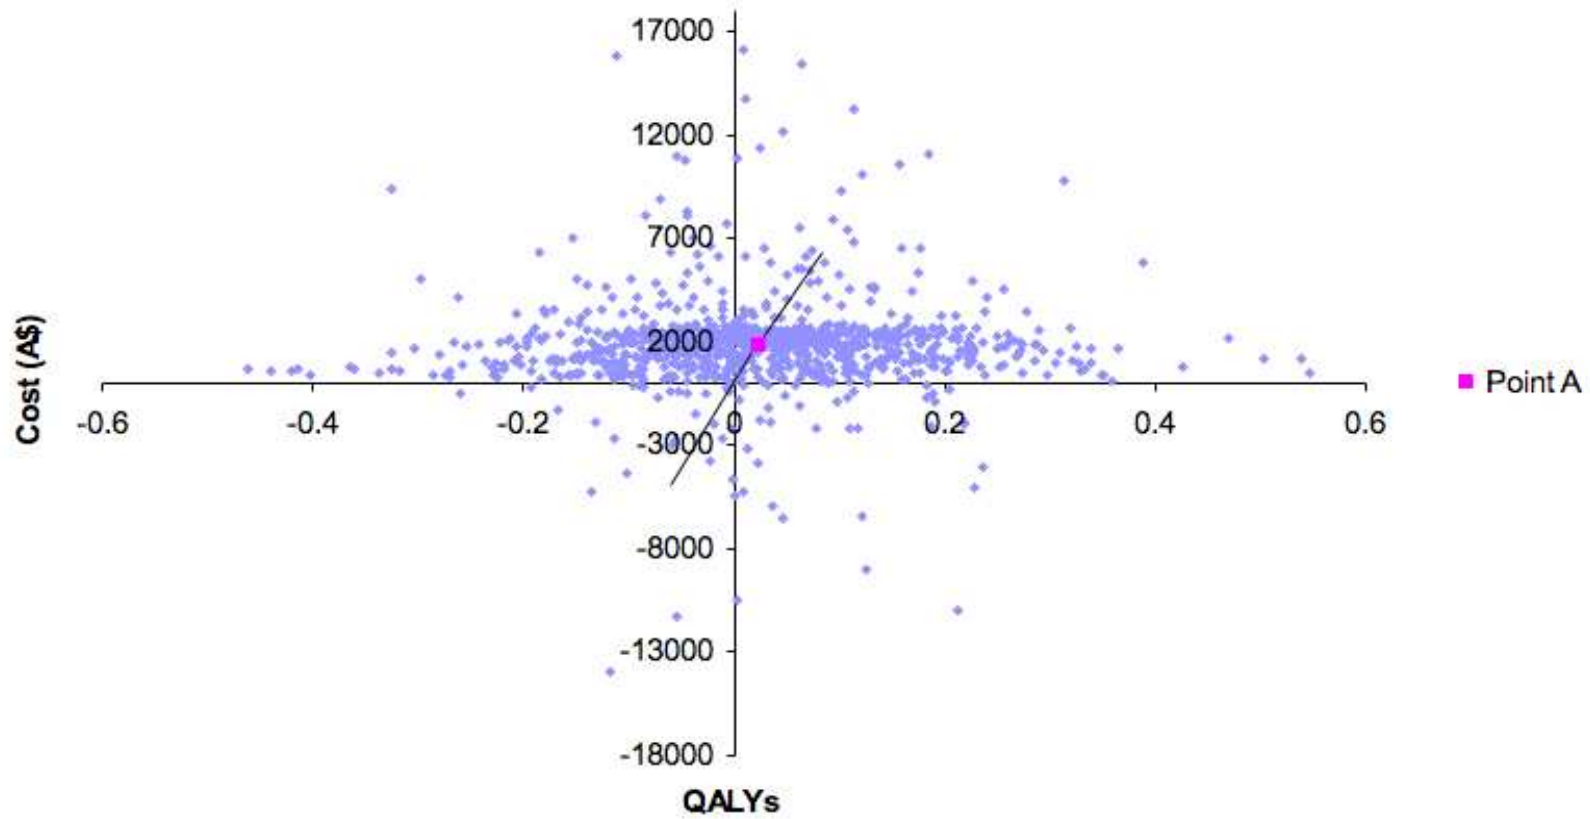

Point A = ICER

1  
2  
3  
4  
5  
6  
7  
8  
9  
10  
11  
12  
13  
14  
15  
16  
17  
18  
19  
20  
21  
22  
23  
24  
25  
26  
27  
28  
29  
30  
31  
32  
33  
34  
35  
36  
37  
38  
39  
40  
41  
42  
43  
44  
45  
46  
47  
48  
49

1  
2  
3  
4  
5  
6  
7  
8  
9  
10  
11  
12  
13  
14  
15  
16  
17  
18  
19  
20  
21  
22  
23  
24  
25  
26  
27  
28  
29  
30  
31  
32  
33  
34  
35  
36  
37  
38  
39  
40  
41  
42  
43  
44  
45  
46  
47  
48  
49

For peer review only

**Appendix 3. Histograms of Individual Parameters**

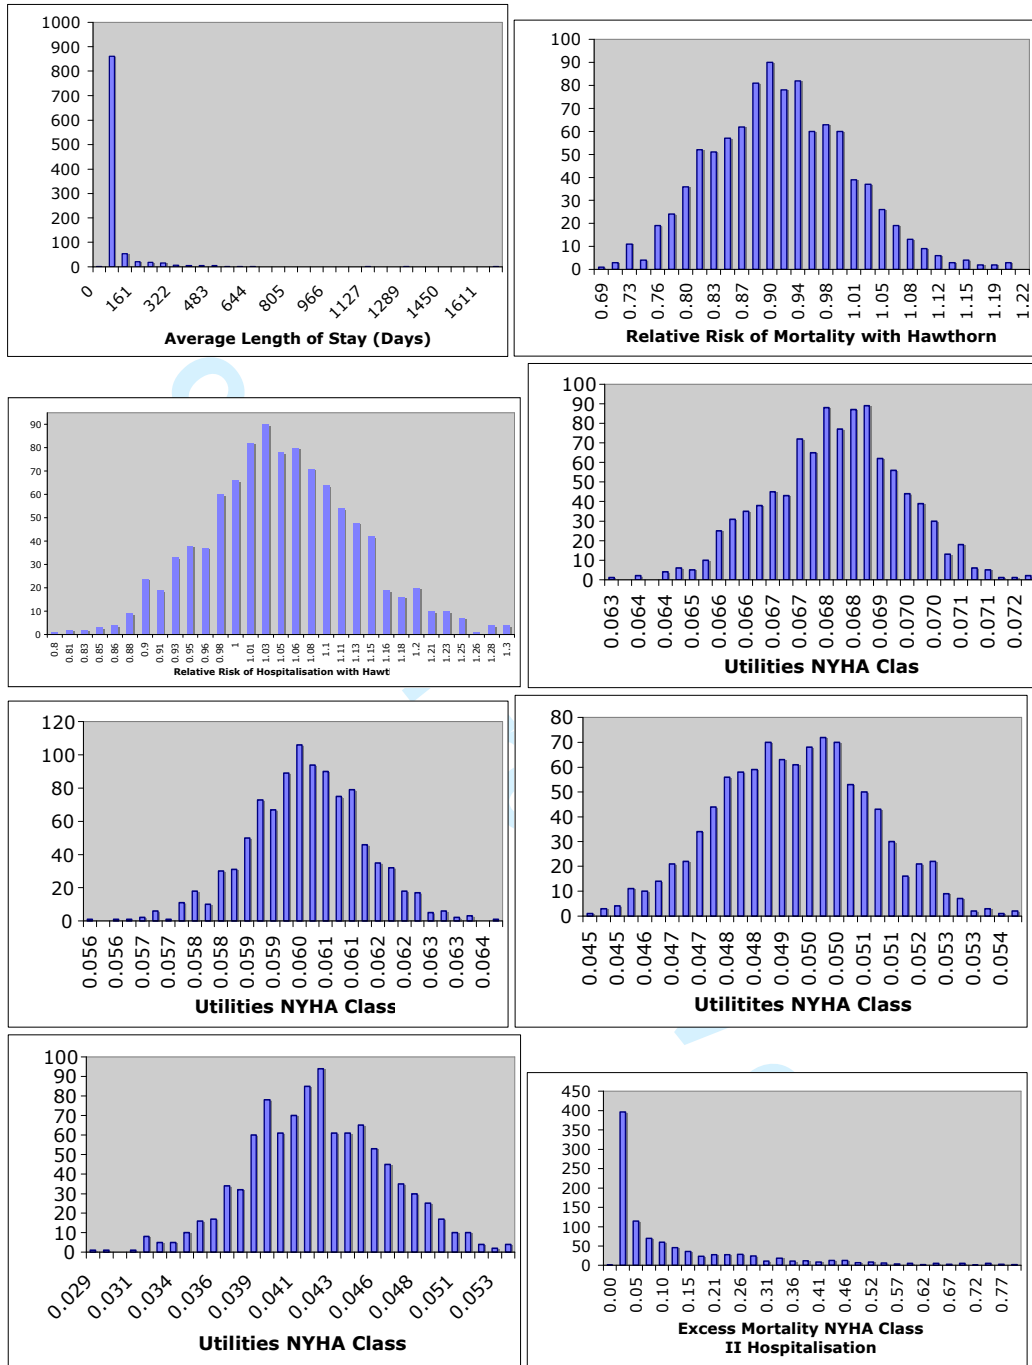

1  
2  
3  
4  
5  
6  
7  
8  
9  
10  
11  
12  
13  
14  
15  
16  
17  
18  
19  
20  
21  
22  
23  
24  
25  
26  
27  
28  
29  
30  
31  
32  
33  
34  
35  
36  
37  
38  
39  
40  
41  
42  
43  
44  
45  
46  
47  
48  
49  
50  
51  
52  
53  
54  
55  
56  
57  
58  
59  
60

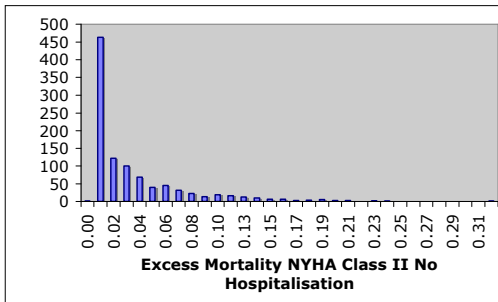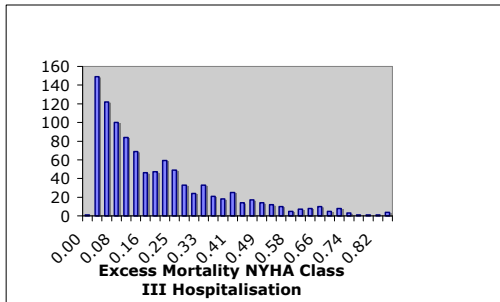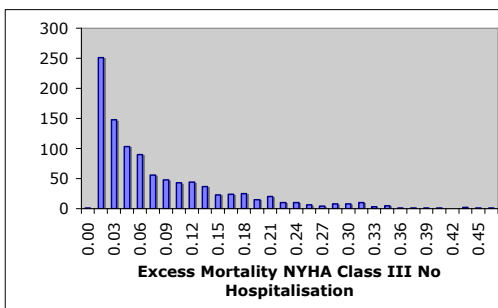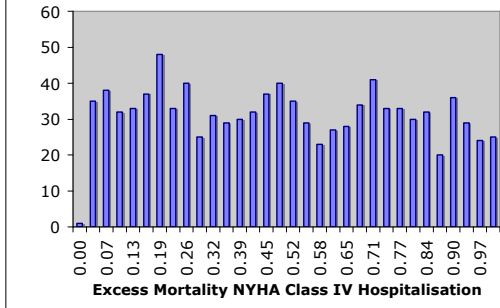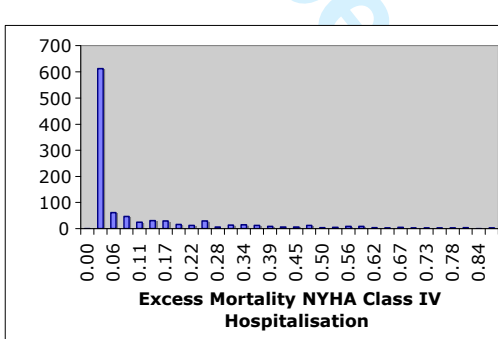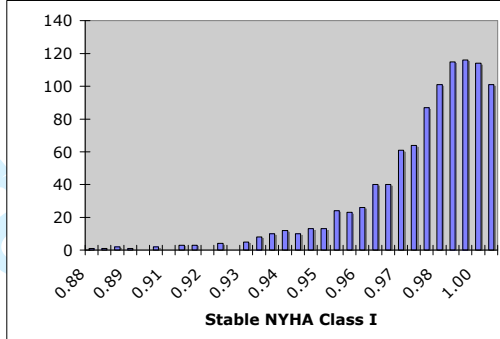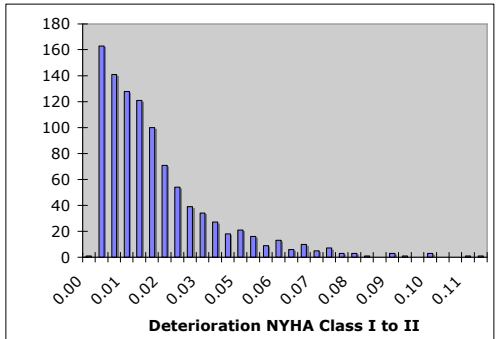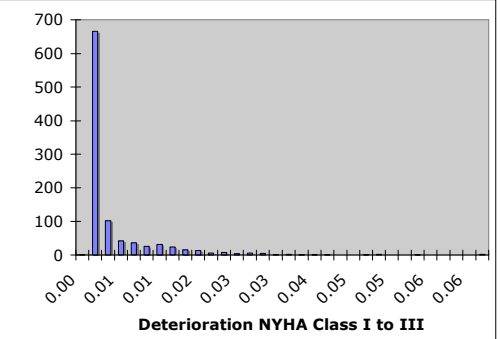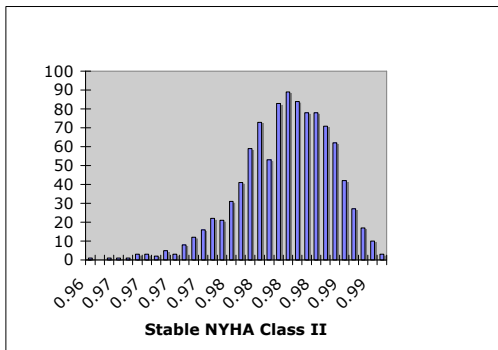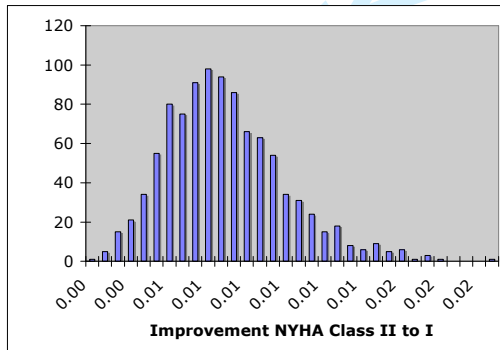

1  
2  
3  
4  
5  
6  
7  
8  
9  
10  
11  
12  
13  
14  
15  
16  
17  
18  
19  
20  
21  
22  
23  
24  
25  
26  
27  
28  
29  
30  
31  
32  
33  
34  
35  
36  
37  
38  
39  
40  
41  
42  
43  
44  
45  
46  
47  
48  
49  
50  
51  
52  
53  
54  
55  
56  
57  
58  
59  
60

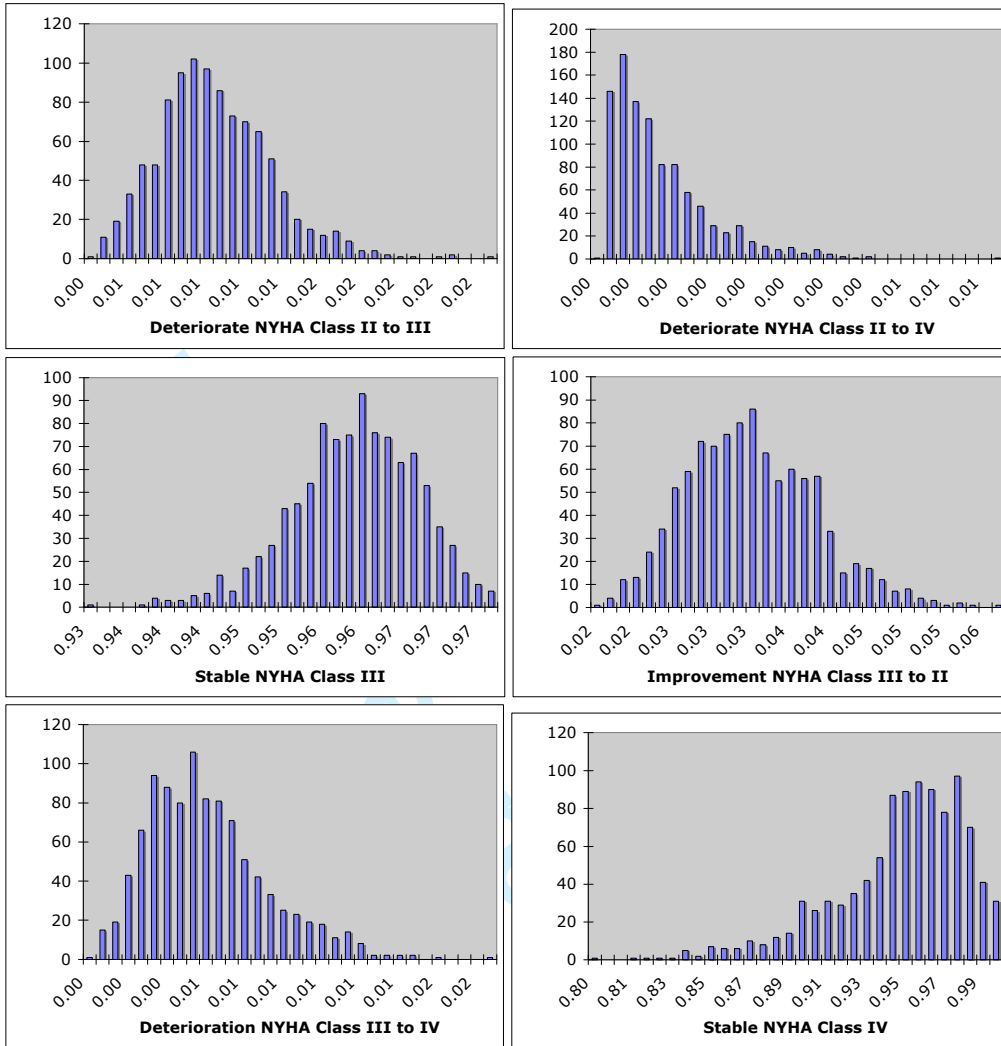

View Only

## EVEREST Statement: Checklist for health economics paper

|                                                                                                                                                | Study section            | Additional remarks                          |
|------------------------------------------------------------------------------------------------------------------------------------------------|--------------------------|---------------------------------------------|
| <b>Study design</b>                                                                                                                            |                          |                                             |
| (1) The research question is stated                                                                                                            | Introduction             |                                             |
| (2) The economic importance of the research question is stated                                                                                 | Introduction             |                                             |
| (3) The viewpoint(s) of the analysis are clearly stated and justified                                                                          | Introduction             |                                             |
| (4) The rationale for choosing the alternative programmes or interventions compared is stated                                                  | Introduction             |                                             |
| (5) The alternatives being compared are clearly described                                                                                      | Introduction;<br>Methods |                                             |
| (6) The form of economic evaluation used is stated                                                                                             | Introduction;<br>Methods |                                             |
| (7) The choice of form of economic evaluation is justified in relation to the questions addressed                                              | Methods;<br>Discussion   |                                             |
|                                                                                                                                                |                          |                                             |
| <b>Data collection</b>                                                                                                                         |                          |                                             |
| (8) The source(s) of effectiveness estimates used are stated                                                                                   | Methods                  | Presented in table form and in written form |
| (9) Details of the design and results of effectiveness study are given (if based on single study)                                              | N/A                      | Data derived from multiple sources          |
| (10) Details of the method of synthesis or meta-analysis of estimates are given (if based on an overview of a number of effectiveness studies) | N/A                      | Meta-analysis was not used                  |
| (11) The primary outcome measure(s) for the economic evaluation are clearly stated                                                             | Methods                  |                                             |
| (12) Methods to value health states and other benefits are stated                                                                              | Methods                  |                                             |
| (13) Details of the subjects from whom valuations were obtained are given                                                                      | N/A                      |                                             |
| (14) Productivity changes (if included) are reported separately                                                                                | N/A                      |                                             |
| (15) The relevance of productivity changes to the study question is discussed                                                                  | N/A                      |                                             |
| (16) Quantities of resources are reported separately from their unit costs                                                                     | Methods                  |                                             |
| (17) Methods for the estimation of quantities and unit costs are described                                                                     | Methods                  |                                             |
| (18) Currency and price data are recorded                                                                                                      | Methods                  |                                             |
| (19) Details of currency of price adjustments for                                                                                              | NA                       | As the study is                             |



|                                                                                          |                                           |                                                                                                |
|------------------------------------------------------------------------------------------|-------------------------------------------|------------------------------------------------------------------------------------------------|
| inflation or currency conversion are given                                               |                                           | looking for relative cost, then inflation would be comparable between the different treatments |
| (20) Details of any model used are given                                                 | Methods                                   |                                                                                                |
| (21) The choice of model used and the key parameters on which it is based are justified  | Methods                                   |                                                                                                |
|                                                                                          |                                           |                                                                                                |
| <b>Analysis and interpretation of results</b>                                            |                                           |                                                                                                |
| (22) Time horizon of costs and benefits is stated                                        | Methods-Model construction;<br>Discussion | Based on current cost estimates                                                                |
| (23) The discount rate(s) is stated                                                      | Methods                                   |                                                                                                |
| (24) The choice of rate(s) is justified                                                  | N/A                                       |                                                                                                |
| (25) An explanation is given if costs or benefits are not discounted                     | N/A                                       |                                                                                                |
| (26) Details of statistical tests and confidence intervals are given for stochastic data | N/A                                       |                                                                                                |
| (27) The approach to sensitivity analysis is given                                       | Methods                                   |                                                                                                |
| (28) The choice of variables for sensitivity analysis is justified                       | Methods                                   |                                                                                                |
| (29) The ranges over which the variables are varied are stated                           | Methods, Table 2                          |                                                                                                |
| (30) Relevant alternatives are compared                                                  | Methods                                   |                                                                                                |
| (31) Incremental analysis is reported                                                    | Results                                   |                                                                                                |
| (32) Major outcomes are presented in a disaggregated as well as aggregated form          | Results                                   |                                                                                                |
| (33) The answer to the study question is given                                           | Results<br>Discussion;<br>Conclusion      |                                                                                                |
| (34) Conclusions follow from the data reported                                           | Discussion;<br>Conclusion                 |                                                                                                |
| (35) Conclusions are accompanied by the appropriate caveats                              | Discussion;<br>Conclusion                 |                                                                                                |



**Development of an Economic Model to Assess the Cost-Effectiveness of Hawthorn Extract as an Adjunct Treatment for Heart Failure in Australia**

|                                 |                                                                                                                                                                                            |
|---------------------------------|--------------------------------------------------------------------------------------------------------------------------------------------------------------------------------------------|
| Journal:                        | <i>BMJ Open</i>                                                                                                                                                                            |
| Manuscript ID:                  | bmjopen-2012-001094.R1                                                                                                                                                                     |
| Article Type:                   | Research                                                                                                                                                                                   |
| Date Submitted by the Author:   | 29-May-2012                                                                                                                                                                                |
| Complete List of Authors:       | Ford, Emily; University of Queensland, School of Population Health<br>Adams, Jon; University of Technology Sydney, Faculty of Nursing, Midwifery and Health<br>Graves, Nicholas; QUT, IHBI |
| <b>Primary Subject Heading</b>: | Health economics                                                                                                                                                                           |
| Secondary Subject Heading:      | Complementary medicine, Cardiovascular medicine                                                                                                                                            |
| Keywords:                       | HEALTH ECONOMICS, Heart failure < CARDIOLOGY, COMPLEMENTARY MEDICINE                                                                                                                       |
|                                 |                                                                                                                                                                                            |

SCHOLARONE™  
Manuscripts

1  
2  
3  
4  
5  
6  
7  
8  
9  
10  
11  
12  
13  
14  
15  
16  
17  
18  
19  
20  
21  
22  
23  
24  
25  
26  
27  
28  
29  
30  
31  
32  
33  
34  
35  
36  
37  
38  
39  
40  
41  
42  
43  
44  
45  
46  
47  
48  
49  
50  
51  
52  
53  
54  
55  
56  
57  
58  
59  
60

# Development of an Economic Model to Assess the Cost-Effectiveness of Hawthorn Extract as an Adjunct Treatment for Heart Failure in Australia

Emily Ford  
School of Population Health  
University of Queensland  
Brisbane, Australia  
Postal address: PO Box 9122  
Wynnum Plaza Queensland 4178  
[emily.ford1@uqconnect.edu.au](mailto:emily.ford1@uqconnect.edu.au)  
Ph +61 (0)7 3901 1429

Professor Jon Adams  
Professor of Public Health  
Faculty of Nursing, Midwifery and Health  
University of Technology  
Sydney, Australia  
and  
Honorary Professor of Sociology  
School of Social Science  
University of Queensland  
Brisbane  
Australia  
[Jon.adams@uts.edu.au](mailto:Jon.adams@uts.edu.au)

Professor Nicholas Graves  
Professor of Health Economics  
School of Public Health and Institute for Health & Biomedical Innovation  
Queensland University of Technology  
Brisbane, Australia  
[n.graves@qut.edu.au](mailto:n.graves@qut.edu.au)

Keywords: complementary therapies, heart failure, cost-benefit analysis, crataegus extract

Word count: 4546

## ABSTRACT

### Objective

An economic model was developed to evaluate the cost-effectiveness of hawthorn extract as an adjunctive treatment for heart failure in Australia.

### Methods

A Markov model of chronic heart failure was developed to compare the costs and outcomes of standard treatment and standard treatment with hawthorn extract using the New York Heart Association (NYHA) classification system. Health states were defined by the New York Heart Association (NYHA) classification system and death Classes I to IV make up the four health states. For any given cycle patients could may remain in the same NYHA class over time, experience an improvement of symptoms and an improvement or deterioration in NYHA class, be hospitalised or die or a deterioration and worsening of NYHA class. Each NYHA class has its own decision tree. Within the decision tree some patients have been admitted to hospital and some have not, some will then die, and some will survive. Model inputs were derived from the published medical literature, and the output was Quality Adjusted Life Years (QALYs). Probabilistic Sensitivity Analysis was conducted. The Expected Value of Perfect Information (EVPI) and the Expected Value of Partial Perfect Information (EVPPPI) were conducted to establish the value of further research and the ideal target for such research.

### Results

Hawthorn extract ~~The new treatment~~ increased costs by \$1866.78 and resulted in a gain of 0.02 QALYs. The incremental cost-effectiveness ratio was \$85,160.33 per QALY. The CEAC indicated at a threshold of \$40,000 the new treatment had a 0.29 probability of being cost-effective. The average incremental NMB was -\$1791.64, the average NMB for the standard treatment was \$92,067.49, and for hawthorn extract ~~the new treatment~~ \$90,275.84. Additional research is potentially cost-effective if research is not proposed to cost more than \$325 million. Utilities is the most important target parameter group for further research.

### Conclusions

Hawthorn extract is not currently considered to be cost-effective in as an adjunctive treatment for heart failure in Australia. Further research in the area of utilities is warranted.

## INTRODUCTION

Heart failure is a major public health concern for all Western countries <sup>1</sup>. In the United States and Europe it is the most common principal diagnosis for adults admitted to hospital aged 65 years and over. In the United States around 2% of the population have heart failure (approximately 5 million people), and each year there are 500, 000 new cases diagnosed <sup>2</sup>. The estimated prevalence in Sweden is 1.5-2%, approximately 135, 000 to 180, 000 people <sup>3</sup>.

Australian data regarding the public health significance and epidemiology of heart failure is currently limited. Estimates rely on information from large-scale population studies conducted in the United States and Europe <sup>1</sup>. It is estimated there are approximately 300,000 Australians living with chronic heart failure, and approximately 30,000 new cases diagnosed each year, with incidence rates and prevalence rising significantly with age <sup>4,5</sup>. In Australia, chronic cardiovascular diseases are associated with health care costs of over five billion dollars, and estimates put the cost of heart failure at around one billion dollars <sup>6</sup>. The mortality, morbidity and health care costs of heart failure are therefore significant <sup>4</sup>.

Heart failure is a syndrome with a range of signs and symptoms, diagnosis is based on such signs and symptoms, including dyspnoea and fatigue, and appropriate investigations, such as echocardiogram, which confirm the presence or absence of heart failure and help determine its aetiology <sup>1</sup>.

Current treatment aims to relieve and stabilise symptoms and prolong survival by stopping, stabilizing or reversing the progression of heart failure <sup>7</sup>. There are a variety of strategies used in Australia, including non-pharmacological management, pharmacological management, lifestyle changes, and the use of supportive devices,

1  
2  
3 surgery, and palliative care<sup>68</sup>. The pharmacological approach depends on the type of  
4 heart failure and extent of the symptoms.  
5  
6

7  
8 Despite the availability of strategies to treat and manage the chronic disease, the  
9 disability and suffering associated with heart failure is devastating<sup>7</sup>. Given this, and  
10 the large economic burden, it is reasonable to examine options not currently  
11 considered standard therapy. Research examining the use of complementary and  
12 alternative medicine, particularly the use of hawthorn extract is showing promising  
13 results.  
14  
15  
16  
17

18  
19 Hawthorn extract is a popular herbal medicine used worldwide, particularly for its  
20 cardiovascular properties<sup>9</sup>. Hawthorn extract has positive inotropic, anti-  
21 inflammatory and anti-oxidative properties; causes peripheral and coronary  
22 vasodilation; and protects against ischaemia induced arrhythmias<sup>9</sup>. A recent  
23 systematic review concluded hawthorn extract can provide significant benefits to  
24 heart failure patients as an adjunct to conventional treatment and a recent cost-  
25 effectiveness study conducted in Germany concluded hawthorn is a cost-effective  
26 treatment option especially in the early stages of heart failure<sup>10-12</sup>.  
27  
28  
29  
30  
31  
32  
33

34  
35 Economic evaluation is a structured method for examining the costs and  
36 consequences involved with alternative methods of treatments and/or programs, in  
37 order to inform which is the best alternative from a particular viewpoint<sup>13</sup>. The goal  
38 is to improve the use of health care resources and improve patient care<sup>14</sup>. When  
39 conducted rigorously, such formal analysis allows recommendation to be made with  
40 transparency regarding the methods, data sources and assumptions<sup>13</sup>. This further  
41 allows the process to be replicated, reviewed and even challenged.  
42  
43  
44  
45  
46

47  
48 Models allow complex situations to be organised into a single coherent form that can  
49 be used to make decisions based on comprehensive consideration of the alternative  
50 interventions by capturing the essential relationships between the factors included in  
51 the model and outcomes<sup>15 16</sup>. Markov models define diseases using clinically  
52 relevant and economically important health states, between which patients move  
53 based on the natural history of the disease, and to which cost and effectiveness  
54 outcomes are ascribed<sup>16</sup>.  
55  
56  
57  
58  
59  
60

1  
2  
3  
4  
5  
6  
7  
8  
9  
10  
11  
12  
13  
14  
15  
16  
17  
18  
19  
20  
21  
22  
23  
24  
25  
26  
27  
28  
29  
30  
31  
32  
33  
34  
35  
36  
37  
38  
39  
40  
41  
42  
43  
44  
45  
46  
47  
48  
49  
50  
51  
52  
53  
54  
55  
56  
57  
58  
59  
60

There are numerous examples of cost-effectiveness modeling in heart failure that examine conventional medicine. Pharmacological, behavioural and surgical interventions have all been investigated and many found to be cost-effective<sup>17 18</sup>. Pharmacological agents that have cost-effectiveness evidence include angiotensin converting enzyme inhibitors (ACEIs), digoxin, and beta-blockers such as carvedilol and nebivolol. Multidisciplinary heart failure management, in the form of a team, usually made up of a nurse co-ordinator and support from medical staff and allied health including dieticians and physiotherapy, has also shown to be cost-effective through reductions in hospitalisation and length of stay<sup>17 19</sup>. Surgical options including heart transplant, through intensive education and maximal medical therapy, have demonstrated a range of cost-effectiveness values. Cardiac resynchronisation therapy with or without an implantable cardioverter-defibrillator, has shown to be cost-effective from a healthcare perspective<sup>17 20</sup>. Most of the recent evidence involves Markov modeling. The models in any area of health vary in terms of the Markov states chosen, for example when representing the severity of heart failure, hospitalisations and NYHA classes of heart failure are both utilised. It is difficult to summarise the multitude of evidence and compare models as different model structures and methods are used, which potentially leads to different outcomes<sup>21</sup>.

The increasing number of published health economic evaluations is not yet reflected in CAM<sup>22 23 24</sup>. A systematic review examined whether CAM demonstrated cost-effectiveness through economic evaluations<sup>25</sup>. This was based on 56 economic evaluations, 39 full economic evaluations and 14 of appropriate quality for further assessment. There was good evidence for the cost-effectiveness of several therapies in comparison to usual care, acupuncture for migraine, manual therapy for neck pain, spa therapy for Parkinson's, self-administered stress management for cancer patients undergoing chemotherapy, pre- and post-operative oral nutritional supplementation for lower gastrointestinal tract surgery, biofeedback for patients with "functional" disorders (eg, irritable bowel syndrome), and guided imagery, relaxation therapy, and a potassium rich diet for cardiac patients. There were a number of therapies that were cost-effective compared to usual care, and evidence to suggest CAM could be cost effective as a complement to usual care<sup>25</sup>.

1  
2  
3  
4  
5  
6  
7  
8  
9  
10  
11  
12  
13  
14  
15  
16  
17  
18  
19  
20  
21  
22  
23  
24  
25  
26  
27  
28  
29  
30  
31  
32  
33  
34  
35  
36  
37  
38  
39  
40  
41  
42  
43  
44  
45  
46  
47  
48  
49  
50  
51  
52  
53  
54  
55  
56  
57  
58  
59  
60

It has been several years since this review, but a literature search suggests the situation today is similar. It is possible to identify economic evaluation of CAM, however there are few full economic evaluations. An example of such an evaluation, is a study examining therapeutic massage, exercise, and lessons in the Alexander technique for treating persistent back pain<sup>26</sup>. Costs included those to the National Health Service (NHS) and to participants. Outcome measures included the Roland-Morris disability score, days in pain, and quality adjusted life years (QALYs). Results included incremental cost effectiveness ratios and cost effectiveness acceptability curves. Massage, lessons in the Alexander technique, and an exercise prescription all provided benefits to patients over a 12-month period. A series of six lessons in the Alexander technique combined with an exercise prescription was the most effective and cost effective option for the NHS<sup>26</sup>.

Some economic evaluations of CAM have incorporated decision modeling. A recent study examined the cost-effectiveness of adding acupuncture to usual care for chronic low back pain, from a societal perspective, using a Markov model<sup>27</sup>. This led to a gain of 0.13 QALYs at an incremental cost of KRW 459,637, resulting in an incremental cost per QALY gained of KRW 3,421,394, well below the recommended threshold based on the per capita gross domestic product in Korea (KRW 20,000,000). The probability of collaborative treatment being cost-effective was 72.3%. The EVPI analysis suggested further research to reduce the uncertainty around the cost-effectiveness of collaborative treatment was of reasonable value. The authors concluded acupuncture plus usual care was more cost-effective than usual care for these patients<sup>27</sup>.

The aim of this study was the construction and application of an economic decision model to evaluate hawthorn treatment as an adjunct to recommended pharmacological treatment versus recommended pharmacological management for chronic heart failure in Australia. The analysis has been conducted using a health sector perspective.

## **METHODS**

### **Model Description**



1  
2  
3 A four state Markov model of chronic heart failure was developed based on the New  
4 York Heart Association (NYHA) classification system using Microsoft Excel® (see  
5 Figure 1). Classes I to IV make up four discrete health states included in the model  
6 (See Table 1 for a description of the NYHA classes). A decision tree completes the  
7 model. Each NYHA class has its own decision tree. Within the decision tree  
8 patients could be hospitalised for worsening heart failure. Patients also either  
9 survived or died.  
10

### 16 **Progression through the model**

17  
18 A simulated cohort of 1000 patients aged 60 entered the model with NYHA class II  
19 heart failure and progressed through the model. Patients progress through the model  
20 in one month cycles for a duration of 5 years. After one month, patients either  
21 remained in NYHA class II or improved to NYHA class I or deteriorated.  
22 In turn, for each class of heart failure patients were either hospitalised or not  
23 hospitalised for worsening heart failure. Patients who were hospitalised or not  
24 hospitalised either survived or died. Death was a possibility from any class of heart  
25 failure. The patients accrued costs and benefits of treatment in each of the states for  
26 each cycle.  
27  
28  
29  
30  
31  
32  
33

34  
35 Per patient costs were required for each NYHA class. Costs were assumed to  
36 be the same for standard treatment and standard treatment with hawthorn extract,  
37 except for the additional cost of hawthorn extract. Patient health was considered as a  
38 single index utility on a zero to one scale, where 0 represents death and 1 represents  
39 perfect health. This allows the calculation of Quality Adjusted Life Years (QALYs)  
40 when combined with the mortality data and the calculation of cost per QALY ratios.  
41  
42  
43  
44  
45

46 Two cohorts were modeled, one receiving standard pharmacological treatment and the  
47 other receiving standard pharmacological treatment with hawthorn extract as an  
48 adjunct. The two cohorts will progress through the model in slightly different ways  
49 and as such there will be a difference in the accumulation of costs and QALYS. It is  
50 the differences in costs and QALYs that will determine the cost-effectiveness of  
51 hawthorn extract in addition to standard pharmacological treatment.  
52  
53  
54  
55  
56  
57  
58  
59  
60

A discount rate of 3% per year was applied to the costs and benefits. This rate is a standard choice in the literature.

**Table 1. NYHA grading of symptoms in chronic heart failure.**

| NYHA Class | Description                                                                                                                                   |
|------------|-----------------------------------------------------------------------------------------------------------------------------------------------|
| Class I    | No symptoms and limitations in ordinary physical activity.                                                                                    |
| Class II   | Slight limitation of physical activity. Ordinary physical activity results in mild symptoms such as fatigue, shortness of breath, and angina. |
| Class III  | Marked limitation of physical activity. Less than ordinary physical activity leads to symptoms.                                               |
| Class IV   | Severely limited. Experiences symptoms even at rest.                                                                                          |

### Model Construction

#### Disease Progression

Transition probabilities for movement between NYHA classes of heart failure were estimated from the published literature detailing the large scale international Study of the Effects of Nebivolol Intervention on Outcomes and Re-hospitalisation in Seniors with Heart Failure (SENIORS) and personal correspondence with authors<sup>18,28</sup>. A thorough literature search was conducted to identify disease progression data for each NYHA class. Data was considered relevant if transition probabilities were provided for each NYHA class. The databases searched were Medline, CINAHL and the Cochrane Library. Search terms used included 'New York Heart Association', 'NYHA', 'NYHA class', 'class', 'Markov model', 'decision model', 'chronic heart failure', and 'heart failure'.

The search yielded a limited number of studies, of which only the above study was considered suitable for inclusion.

Disease progression between the Markov states was assumed to be the same for standard treatment and for standard treatment with hawthorn extract, as we were unable to identify reliable data to indicate that hawthorn extract altered progression through the classes of heart failure. Transition probabilities were fixed over time. We have incorporated a difference in mortality and a difference in the hospitalisation rate between the standard treatment and the standard treatment with hawthorn extract as an adjunct, which in turn will impact on the cost and QALY outcomes.

## Data Sources

### Mortality

Baseline mortality was derived from Australian Bureau of Statistics general population mortality data.

Mortality data was of interest if it was provided for each NYHA class and if it concerned the excess mortality from heart failure and/or cardiovascular causes. The databases searched were Medline, CINAHL and the Cochrane Library. Search terms used included 'New York Heart Association', 'NYHA', 'NYHA class', 'class', 'Markov model', 'decision model', 'chronic heart failure', 'heart failure', 'mortality'.

The mortality rate for cardiovascular causes was derived from the published literature detailing one-year mortality among unselected patients with NYHA class II-IV heart failure in Switzerland<sup>29</sup>. The mortality rate increased with progression from NYHA class I to NYHA class IV, and varied depending on whether the patient was hospitalised or not. A thorough search of the literature was made to identify data for each NYHA class individually, nothing was identified and the above study was the closest to ideal. Hospitalisation was considered a major factor in cost estimation, so data broken down by hospitalisation status was considered to represent the population of heart failure patients well. Also, unselected patients were considered to represent the patient cohort more accurately than studies that focused on hospitalised patients only. As data for NYHA class I was not included, an assumption was made that mortality for NYHA class I was the same as the general population mortality.

### Health Status

Estimates of health status were derived from the same source as the transition probabilities<sup>18 20</sup>. Data concerning utilities for heart failure is extremely limited, a study was identified that had specifically had developed utilities for heart failure in terms of both hospitalisation and NYHA class. However, we were unable to obtain the required data despite personal correspondence with the authors. The estimated health status used was considered the next best data source.

Health status was assumed to be the same for standard treatment and standard treatment with hawthorn extract. Hospitalisation was assumed to result in a health

1  
2  
3 state lower than non-hospitalisation and a -0.1 disutility was applied to hospitalisation  
4 to reflect this.  
5  
6  
7

#### 8 Effect of Hawthorn

9  
10 A literature search identified the existing research for the use of hawthorn extract in  
11 the treatment of heart failure. The search included electronic databases (Medline,  
12 PubMed, CAM on PubMed, AMED, Econolit, DynaMed, CINAHL, Cochrane  
13 Database of Systematic Reviews), hand searches of the literature, including hard  
14 copies of journals, and a search of the reference lists of the articles and publications  
15 found through electronic and hand searches. Personal communication with authors  
16 and experts including manufacturers and researchers in the field was also necessary to  
17 identify other sources of information and research that may not have been found using  
18 any other methods.

19  
20 A wide range of search terms was used including: 'heart failure', 'chronic heart  
21 failure', 'systolic heart failure', and 'congestive heart failure', 'hawthorn',  
22 'Crataegus', 'Crataegus oxyacantha', 'Crataegus monogyna', 'whitethorn',  
23 weissdorn', 'Crataegus laevigata', 'WS 1442', 'LI 132', 'complementary',  
24 'alternative', 'medicine' and 'therapy'. There were several studies written in German,  
25 these were translated into English and then examined.

26  
27  
28 Publicly accessible trials registers were also searched. The Australian New Zealand  
29 Clinical Trials Registry (ANZCTR) was searched, no studies were identified. The  
30 World Health Organisation International Clinical Trials Registry Platform was  
31 searched, no new relevant trials were identified. The search terms used were:  
32 'hawthorn extract', 'hawthorn', 'crataegus', 'WS1442', 'whitehorn', 'heart failure'.

33  
34  
35 There were no planned exclusion criteria at this stage for the patient population as any  
36 of the studies found have the potential to contribute valuable information to inform  
37 the model development.

38  
39  
40  
41  
42  
43  
44  
45  
46  
47  
48  
49  
50  
51  
52 The relative risk of mortality and relative risk of hospitalisation with hawthorn extract  
53 was derived from the Survival and Prognosis: Investigation of Crataegus Extract WS  
54 1442 in congestive heart failure (SPICE) trial, a large scale, international, randomised,  
55 placebo-controlled, double-blind study designed to investigate the influence of  
56  
57  
58  
59  
60

1  
2  
3 hawthorn extract on mortality of patients with congestive heart failure NYHA class II  
4 and III with at least moderately impaired left ventricular function<sup>30</sup>. To date there  
5 have only been two studies to examine the effect of hawthorn extract on heart failure  
6 progression in terms of mortality and hospitalisation. Most studies have focused on  
7 symptoms and exercise capability. SPICE enrolled ~~2681~~~~nearly 3000~~ patients, and the  
8 Hawthorn Extract Randomised Blinded Chronic Heart Failure (HERB CHF) trial  
9 enrolled 120 patients<sup>31 32</sup>. Meta-analysis was not considered appropriate, therefore  
10 the data from SPICE was incorporated into the model.  
11  
12  
13  
14  
15  
16

### 17 18 Costs

19 No Australian data was available to estimate the hospitalisation rate and number of  
20 hospitalisations, this information was derived from a United States study<sup>33</sup>.  
21 The estimated length of stay in hospital data was obtained from Victorian Department  
22 of Health for 2010-2011, it was unavailable for each NYHA class, so it was assumed  
23 to be the same for all classes<sup>34</sup>.  
24  
25  
26  
27

28 The cost of a hospital admission per day was derived from the Queensland  
29 Government/ Queensland Health Casemix Funding Model 2008-2009 Component  
30 Prices Summary (\$3,775 per day)<sup>35 26</sup>.  
31  
32

33 Outpatient costs included General Practitioner (GP) visits, pathology (urea, creatinine,  
34 electrolytes), echocardiograms, and specialist visits. Estimates of the number of GP  
35 and specialist visits came from a combination of Australian sources and overseas  
36 studies due to the difficulty in finding complete Australian estimates. It was  
37 estimated that NYHA class I had 6 GP visits per year, and the remaining NYHA  
38 classes had 12 visits per year at \$34.30 per visit. Pathology was assumed to be  
39 required every 3 months at a cost of \$17.80. An Echocardiogram was assumed to be  
40 performed every two years (\$230.65). A specialist visit was assumed to occur twice  
41 per year (\$290 initial visit, \$194 repeat visit). If hospitalized, it was assumed patients  
42 had an extra 3 specialist visits and 2 GP visits per year. The costs came directly from  
43 the Medicare Benefits Schedule and the Queensland Government/ Queensland Health  
44 Casemix Funding Model 2008-2009 Component Prices Summary<sup>35 36</sup>.  
45  
46  
47  
48  
49  
50  
51  
52

53 The information for which medications are taken for each NYHA class have been  
54 taken from the National Heart Foundation guidelines for the treatment of chronic  
55 heart failure in Australia<sup>5</sup>. Information for the optimal dosages prescribed has been  
56 taken from the Australian Therapeutic Guidelines. Individual drug pricing was  
57  
58  
59  
60

obtained from the most recently available online version of the Medicare Benefits Schedule. The initial version of the model has incorporated the assumption that medications are taken in 100% of patients and that dosing is optimal. The model however can be altered to consider different scenarios of medication prescription and consumption.

The dosage was assumed to be 900mg daily, consistent with the dosage used in the two most recent trials of hawthorn extract, the SPICE trial and the HERB-CHF trial<sup>30</sup><sup>32 37</sup>. An online search was conducted for standardised monopreparations of hawthorn leaf with flower available for purchase. [Cardiomax® retails for A\\$25.95.](#)

[The transition parameters are listed in Table 2.](#) The model parameters have been listed in Table 3. [Appendix 1 details the calculation of transition probabilities for the model.](#)

**[Table 2. Transition Parameters used in the Decision Model](#)**

| <i>Transition Matrix</i> | <b>NYHA I</b> | <b>NYHA II</b> | <b>NYHA III</b> | <b>NYHA IV</b> | <b>Distribution</b> |
|--------------------------|---------------|----------------|-----------------|----------------|---------------------|
| <b>NYHA I</b>            | 0.977         | 0.019          | 0.004           | 0.000          | Dirichlet           |
| <b>NYHA II</b>           | 0.008         | 0.981          | 0.010           | 0.001          | Dirichlet           |
| <b>NYHA III</b>          | 0.000         | 0.034          | 0.960           | 0.006          | Dirichlet           |
| <b>NYHA IV</b>           | 0.000         | 0.000          | 0.055           | 0.945          | Dirichlet           |

**Table 3. Parameters used in the Decision Model**

| <b>Probabilistic Parameters</b>                                |                          |                           |                     |                  |
|----------------------------------------------------------------|--------------------------|---------------------------|---------------------|------------------|
| <b>Parameter Description</b>                                   | <b>Baseline Estimate</b> | <b>Variation/ SE (SD)</b> | <b>Distribution</b> | <b>Reference</b> |
| <b>Hospitalisation</b>                                         |                          |                           |                     |                  |
| <b>Length of stay in hospital estimate</b>                     | 4.9 days                 | Alpha 0.1<br>Beta 316.81  | Gamma               | <sup>34</sup>    |
| <b>Relative Risk of Hospitalisation with Hawthorn Extract</b>  | 1.03651200               | 0.080800494               | Lognormal           | <sup>37</sup>    |
| <b>Mortality</b>                                               |                          |                           |                     |                  |
| <b>Excess Mortality</b>                                        |                          |                           | Beta                | <sup>29</sup>    |
| probability of excess mortality given hospitalisation class II | 0.01087776               | Alpha<br>0.35916667       | Beta<br>2.55750000  |                  |
| probability of excess mortality                                | 0.002620782              | Alpha<br>0.43166667       | Beta<br>13.485000   |                  |

|                                                                    |                     |                      |                       |                      |
|--------------------------------------------------------------------|---------------------|----------------------|-----------------------|----------------------|
| given no hospitalisation class II                                  |                     |                      |                       |                      |
| probability of excess mortality given hospitalisation class III    | 0.01791369          | Alpha 0.79666667     | Beta 3.28666667       |                      |
| probability of excess mortality given no hospitalisation class III | 0.00674466          | Alpha 0.72833333     | Beta 8.60500000       |                      |
| probability of excess mortality given hospitalisation class IV     | 0.05333974          | Alpha 0.96416667     | Beta 1.03583333       |                      |
| probability of excess mortality given no hospitalisation class IV  | 0.00719464          | Alpha 0.16583333     | Beta 1.83416667       |                      |
| <b>Relative Risk of Mortality with Hawthorn Extract</b>            | 0.90336300          | 0.09507420           | Lognormal             | <sup>37</sup>        |
| <b>Utility</b>                                                     |                     |                      | Beta                  | <sup>18</sup>        |
| Utility of NYHA class I no hospitalisation                         | 0.815               | Alpha 395.88         | Beta 89.86            |                      |
| Utility of NYHA class II no hospitalisation                        | 0.72                | Alpha 661.95         | Beta 257.42           |                      |
| Utility of NYHA class III no hospitalisation                       | 0.59                | Alpha 359.8075       | Beta 250.0357         |                      |
| Utility of NYHA class IV no hospitalisation                        | 0.508               | Alpha 51.77          | Beta 50.1394          |                      |
| <b>Fixed Parameters</b>                                            |                     |                      |                       |                      |
| <b>Parameter Description</b>                                       | <b>NYHA class I</b> | <b>NYHA class II</b> | <b>NYHA class III</b> | <b>NYHA class IV</b> |
| <b>Hospitalisation</b>                                             |                     |                      |                       | <sup>35</sup>        |
| Probability for hospitalisation                                    | 0.01518800          | 0.02397800           | 0.02397800            | 0.15397000           |
| Probability no hospitalisation                                     | 0.98481200          | 0.97602200           | 0.97602200            | 0.84603000           |
| <b>Costs</b>                                                       |                     |                      |                       | <sup>35 36 38</sup>  |
| Cost of hospitalisation                                            | \$2,957.08          | \$4,435.63           | \$4,435.63            | \$5,914.17           |
| Total cost for each NYHA class with hospitalisation                | \$3,141.60          | \$4,639.95           | \$4,684.53            | \$6,176.17           |
| Cost of each class with no hospitalisation                         | \$130.30            | \$150.11             | \$194.69              | \$207.79             |
| <b>Mortality</b>                                                   |                     |                      |                       | <sup>39</sup>        |

|                                |              |              |              |              |
|--------------------------------|--------------|--------------|--------------|--------------|
| <b>Standardised Death Rate</b> | 6.0 per 1000 | 6.0 per 1000 | 6.0 per 1000 | 6.0 per 1000 |
|--------------------------------|--------------|--------------|--------------|--------------|

### **Probabilistic Sensitivity Analysis**

Uncertainty is addressed in the model using probabilistic sensitivity analysis. Statistical distributions were assigned to key model parameters to examine second-order uncertainty in the estimation of the parameter. Uncertainty was propagated through the model using Monte Carlo simulation, drawing parameter values at random 1000 times from the particular distributions. This generates a joint density of cost and QALY outcomes that summarises uncertainty in all model parameters.

### **Net Monetary Benefit**

The incremental net monetary benefit was calculated. The difference between the average net benefit of the standard treatment and the average net benefit of the standard treatment with hawthorn as an adjunct is equal to the incremental net benefit. The net benefit for each treatment is the increase in effectiveness multiplied by the amount the decision maker is willing to pay per QALY (\$40,000), less the increase in cost.

### **The Expected Value of Perfect Information/ Expected Value of Partial Perfect Information (EVPI/ EVPPI)**

The results of the modeling will indicate whether, based on the currently available information, the new treatment should be recommended. This decision is always associated with a level of uncertainty, which raises the question of whether it is appropriate to conduct further research to better examine the potential value of the new treatment, and whether we can identify where this research needs to be directed. EVPI and EVPPI analysis have been used to address these questions.

EVPI analysis is a combination of the cost of making the wrong decision in terms of forgone health benefit and wasted resources, and the probability of making a wrong decision. This equates to the expected cost of uncertainty. With all uncertainty removed there would be economic savings from making the best decision and EVPI is a monetary value of these savings. EVPI provides an upper bound for spending on



1  
2  
3 further research that reduces uncertainty in the decision. EVPPI follows the same  
4 principles, but examines individual parameters<sup>40</sup>.  
5  
6  
7

8 For the model it has been assumed the life of technology is 10 years and the number  
9 of eligible patients per annum has been estimated at 30, 000. This estimate is derived  
10 from the estimate of 30, 000 new cases of chronic heart failure per annum.  
11  
12

## 13 14 15 **RESULTS**

16  
17 For the standard treatment and standard treatment with hawthorn extract as an adjunct  
18 the total cost per patient was \$4,887.82 and \$6754.59 QALYs were 2.40 and 2.42  
19 respectively. This was an incremental cost of \$1866.78 and 0.02 QALYs, and the  
20 incremental cost-effectiveness ratio was \$85,160.33 per QALY. A Cost-  
21 Effectiveness Plane shows the joint density of cost and QALY outcomes from the  
22 Monte Carlo simulations (See Appendix 2). The variation in the model parameters  
23 can be seen in a series of histograms for each of the probabilistic parameters (See  
24 Appendix 3).  
25  
26  
27  
28  
29  
30  
31

### 32 **Cost-Effectiveness Acceptability Curve (CEAC)**

33  
34 Figure 2 shows the uncertainty around this estimate as a cost-effectiveness  
35 acceptability curve (CEAC). At a willingness to pay threshold of \$40,000, the ~~new~~  
36 treatment with hawthorn extract has a 0.29 probability of being cost-effective. The  
37 probability of being cost effective rises as the willingness to pay threshold rises, for a  
38 threshold between \$500,000 and \$1,000,000 the probability is 0.48.  
39  
40  
41  
42

### 43 **Net Monetary Benefit (NMB)**

44  
45 For a threshold of \$40,000, the average incremental NMB is -\$1791.64, the average  
46 NMB for the standard treatment is \$92,067.49, and for the standard treatment with  
47 hawthorn as an adjunct~~new treatment~~ \$90,275.84. The treatment with hawthorn  
48 extract~~new intervention~~ has a negative incremental net benefit, and would not offer  
49 good value for money for a decision maker.  
50  
51  
52  
53  
54

### 55 **Expected Value of Perfect Information (EVPI)**

1  
2  
3 The population EVPI has been plotted in Figure 3 for a cost-effectiveness threshold  
4 between \$0 and \$200, 000 per QALY. The threshold was continued in the analysis up  
5 to a threshold of \$500,000 per QALY, however this did not alter the slope of the  
6 curve, so the results up to \$200, 000 have been shown.  
7  
8

9  
10  
11 If the population EVPI represented in Figure 3 exceeds the expected costs of  
12 additional research, then it is potentially cost-effective to conduct further research.  
13

14  
15  
16 At a threshold of \$40,000 additional research is potentially cost-effective if research is  
17 not proposed to cost more than \$325 million.  
18

19  
20  
21 If we proposed additional research would cost \$100 million, it can be seen from  
22 Figure 3 that this research would be potentially cost-effective at a threshold of just  
23 under \$16,000. Even at a threshold of \$0 per QALY research would potentially be  
24 cost-effective as long as the cost of research did not exceed \$15 million.  
25  
26

27  
28  
29 The EVPI has indicated further research is potentially cost-effective. The Expected  
30 Value of Partial Perfect Information (EVPPI) was examined to establish where further  
31 research would be of most benefit.  
32  
33

### 34 35 36 **The Expected Value of Partial Perfect Information (EVPPI)**

37  
38 The EVPPI was examined for six parameters/ groups of parameters, Transitions,  
39 Average Length of stay, Excess Mortality (cardiovascular mortality), Relative Risk of  
40 Hawthorn, Utilities, and the Relative Risk of Hospitalisation.  
41  
42

43  
44  
45 The results of the EVPPI analysis can be seen in Figure 4 (and Table 4). From both  
46 the table and figure it can be seen that all parameters and parameter groups have  
47 significant EVPPI, but the impact varies. Utilities (\$439,471,050.98) has the highest  
48 EVPPI, and is therefore the most important target parameter/ parameter group for  
49 further research.  
50  
51

52  
53  
54  
55  
56 **Table 4. Partial EVPI Values for Parameters/ Parameter Groups**

57  
58 Parameters Partial EVPI  
59  
60

|                               |                  |
|-------------------------------|------------------|
| Transitions                   | \$7,153,571.92   |
| Average Length of stay        | \$96,900,062.41  |
| Excess Mortality              | \$105,833,952.26 |
| Relative Risk Hawthorn        | \$86,323,972.20  |
| Utilities                     | \$439,471,050.98 |
| Relative Risk Hospitalisation | \$56,991,399.70  |

## DISCUSSION

In this modelling study we examined the cost-effectiveness of hawthorn extract in addition to standard treatment for heart failure in Australia. This treatment is not considered cost-effective given the current evidence. This is the first known attempt to examine the cost-effectiveness of hawthorn extract in addition to standard pharmacological treatment of chronic heart failure in Australia. Economic evaluation has been conducted examining hawthorn extract and standard heart failure treatment in Germany and this research indicates hawthorn extract was cost-effective in the study context, however, these studies were not considered rigorous enough for the data to be used in this study<sup>10 41</sup>.

EVPI analysis indicated that further research was likely to be of benefit, and EVPPI analysis indicated that research ideally should be targeted toward Utilities. The potential costs of further research and the particular type or types that may be required are of crucial importance to the final decision. Further research to examine Utilities will likely rely on primary data from randomized controlled trials such as the Eplerenone Post-acute Myocardial Infarction Heart Failure Efficacy and Survival Study (EPHESUS) and the Study of the Effects of Nebivolol Intervention on Outcomes and Rehospitalisation in Seniors with Heart Failure Study (SENIORS)<sup>18 42</sup>. Alternatively such research would require the initiation of novel research with utilities as a main outcome. This is costly research and this would certainly need to be estimated before any research was undertaken.

A limitation of this study was the relatively sparse data available for the Australian context. There is scarce data on the incidence and prevalence of heart failure.

1  
2  
3 Estimates rely on information from a small number of large-scale population studies  
4 conducted in the United States and Europe <sup>1</sup>. The study of mortality in Australia is  
5 complex, heart failure is considered a 'mode of death' not a 'cause of death'. Studies  
6 examining mortality in terms of the underlying cause of death risk underestimating  
7 mortality with condition such as heart failure. Mortality statistics are complicated by  
8 multiple co-morbidities, which make the underlying cause of death difficult to  
9 identify. Lack of consensus about the diagnosis of heart failure also complicates  
10 recording of the cause of death, indeed complicating any examination of heart failure.  
11 It is difficult to isolate costs for heart failure. Heart failure is grouped by the  
12 Australian Institute of Health and Welfare as an 'other cardiovascular disease'. The  
13 exact contribution of heart failure to the burden of cardiovascular disease is at best an  
14 estimate.  
15  
16  
17  
18  
19  
20  
21  
22  
23

24  
25 Another limitation was the availability of evidence of the effectiveness of hawthorn  
26 extract. There are numerous studies supporting its use, however, very few studies that  
27 examine final outcomes such as hospitalisation and mortality<sup>12,30,32</sup>. Previously  
28 conducted studies focus on reported outcomes including maximal workload, exercise  
29 tolerance, pressure-heart rate product, 6-min walk test, and left-ventricular ejection  
30 fraction. There are suggestions in the literature that the use of hawthorn extract can  
31 actually decrease the use of standard pharmacological therapy and alter the  
32 progression of heart failure, but little rigorous evidence to support this <sup>10</sup>. If the use of  
33 standard pharmaceuticals was decreased, and/or disease progression was altered and  
34 patients improved their NYHA class to a greater extent or remained in the less  
35 symptomatic classes for longer such evidence was available this would  
36 decrease~~change the~~ costs ~~and benefits of hawthorn extract,~~ and potentially change the  
37 cost-effectiveness in favour of adding~~of~~ hawthorn extract as an adjunct to standard  
38 pharmacological treatment.  
39  
40  
41  
42  
43  
44  
45  
46  
47  
48

49  
50 Should further evidence become available, the model can easily be updated and the  
51 results re-examined.  
52

## 53 54 CONCLUSION

1  
2  
3 Our analysis indicates that based on currently available evidence, hawthorn extract is  
4 not cost-effective in addition to standard pharmacological treatment for chronic heart  
5 failure in Australia. EVPI and EVPPI analysis indicates that further research is  
6 warranted, particularly in the area of utilities, pending an assessment of the estimated  
7 costs of such research.  
8  
9  
10

11  
12  
13 **Funding** This research received no specific grant from any funding agency in the  
14 public, commercial or not-for-profit sectors.  
15  
16

17  
18 **Competing Interests** None.  
19  
20

21 **Contributors** EF, NG and JA were responsible for the conception and design of the  
22 research. EF carried out the data collection and economic analysis. EF was  
23 responsible for the original draft. All authors contributed equally to all other aspects  
24 including drafting and revising, and approved the final manuscript.  
25  
26  
27  
28  
29  
30  
31  
32  
33  
34  
35  
36  
37  
38  
39  
40  
41  
42  
43  
44  
45  
46  
47  
48  
49  
50  
51  
52  
53  
54  
55  
56  
57  
58  
59  
60

## REFERENCES

1. Krum H, Stewart S. Chronic heart failure: time to recognise this major public health problem. *Med J Aust* 2006;184:147-48.
2. McLean AS, Eslick GD, Coats AJS. The epidemiology of heart failure in Australia. *Int J Cardiol* 2007;118:370-74.
3. Agvall B, Borgquist L, Foldevi M, Dahlstrom U. Cost of heart failure in Swedish primary healthcare. *Scand J Prim Health* 2005;23:227-32.
4. Australian Institute of Health and Welfare. Heart failure: what of the future? Cat. No. AUS 34. Canberra: AIHW, 2003.
5. National Heart Foundation of Australia and the Cardiac Society of Australia and New Zealand (Chronic Heart Failure Guidelines Expert Writing Panel). Guidelines for the prevention, detection and management of chronic heart failure in Australia, 2006., 2006.
6. Krum H, Jelinek MV, Stewart S, *et al.* Guidelines for the prevention, detection and management of people with chronic heart failure in Australia in 2006. *Med J Aust* 2006;185:549-56.
7. Kaye DM, Krum H. Drug discovery for heart failure: a new era or the end of the pipeline? *Nat Rev Drug Discov* 2007;6:127-39.
8. Quinn B. Pharmacological treatment of heart failure. *Crit Care Nurs Q* 2007;30:299-306.
9. Furey A, Tassell M. Towards a scientific approach in the assessment of efficacy of an herbal preparation: hawthorn (*Crataegus* spp.). *Eur J Heart Fail* 2008;10:1153-57.

- 1  
2  
3 10. Habs M. Prospective, comparative cohort studies and their contribution to the  
4  
5 benefit assessments of therapeutic options: heart failure treatment with and  
6  
7 without hawthorn special extract WS 1442. *Forsch Komp Klas Nat*  
8  
9 2004;11:36-39.
- 10  
11 11. Pittler MH, Schmidt K, Ernst E. Hawthorn extract for treating chronic heart  
12  
13 failure: meta-analysis of randomised trials. *Am J Med* 2003;114:665-74.
- 14  
15 12. Guo R, Pittler MH, Ernst E. Hawthorn extract for treating chronic heart failure  
16  
17 (Review). *Cochrane Database Syst Rev* 2009; Issue 1. Art No: CD005312.  
18  
19 DOI: 10.1002/14651858.CD005312.pub2.
- 20  
21 13. Griffin S, Claxton K, Sculpher M. Decision analysis for resource allocation in  
22  
23 health care. *J Health Serv Res Po* 2008; 13:23-30.
- 24  
25 14. Kymes S. An introduction to decision analysis in the economic evaluation of the  
26  
27 prevention and treatment of vision-related diseases. *Ophthal Epidemiol*  
28  
29 2008;15:76-83.
- 30  
31 15. Buxton MJ, Drummond MF, Van Hout BA, *et al.* Modelling in economic  
32  
33 evaluation: an unavoidable fact of life. *Health Econ* 1997;6:217-27.
- 34  
35 16. Spencer M, Briggs A, Grossman R, *et al.* Development of an economic model to  
36  
37 assess the cost effectiveness of treatment interventions for chronic obstructive  
38  
39 pulmonary disease. *Pharmacoeconomics* 2005;23:619-37.
- 40  
41 17. Rich MW, Nease RF. Cost-effectiveness analysis in clinical practice: the case of  
42  
43 heart failure *Arch Intern Med* 1999;159:1690-700.
- 44  
45 18. Yao G, Freemantle N, Flather M, *et al.* Long-term cost-effectiveness analysis of  
46  
47 nebivolol compared with standard care in elderly patients with heart failure: an  
48  
49 individual patient-based simulation model. *Pharmacoeconomics* 2008;26:879-  
50  
51 89.
- 52  
53  
54  
55  
56  
57  
58  
59  
60

- 1  
2  
3 19. Miller G, Randolph S, Forkner E, *et al.* Long-term cost-effectiveness of disease  
4 management in systolic heart failure. *Med Decis Making OnlineFirst* 2009.  
5  
6  
7 20. Yao G, Freemantle N, Calvert M, *et al.* The long-term cost-effectiveness of  
8 cardiac resynchronization therapy with or without an implantable cardioverter-  
9 defibrillator. *Eur Heart J* 2007;28:42-51.  
10  
11  
12 21. Turner D, Raftery J, Cooper K, *et al.* The CHD challenge: Comparing four cost-  
13 effectiveness models. *Value Health* 2011;14:53-60.  
14  
15  
16 22. Canter P, Thompson-Coon J, Ernst E. Cost effectiveness of complementary  
17 treatments in the United Kingdom: a systematic review. *Brit Med J*  
18 2005;331:880-81.  
19  
20  
21 23. Dalziel K, Segal L, Mortimer D. Review of Australian health economic evaluation  
22 - 245 interventions: what can we say about cost effectiveness? *Cost Eff Resour*  
23 *Alloc* 2008;6:9.  
24  
25  
26 24. Thompson T, Feder G. Complementary therapies and the NHS: uncertain  
27 evidence of cost effectiveness should not exclude complementary medicine  
28 from reviews and guidelines. *Brit Med J* 2005;331:856-57.  
29  
30  
31 25. Herman P, Craig B, Caspi O. Is complementary and alternative medicine (CAM)  
32 cost-effective? A systematic review. *BMC Complem Altern M* 2005;5:11.  
33  
34  
35 26. Hollinghurst S, Sharp D, Ballard K, *et al.* Randomised controlled trial of  
36 Alexander technique lessons, exercise, and massage (ATEAM) for chronic  
37 and recurrent back pain: economic evaluation. *Brit Med J Online First*  
38 2008;337:a2656.  
39  
40  
41 27. Kim N, Yang B, Lee T, *et al.* An economic analysis of usual care and acupuncture  
42 collaborative treatment on chronic low back pain: a Markov model decision  
43 analysis. *BMC Complem Altern M* 2010;10:274.  
44  
45  
46  
47  
48  
49  
50  
51  
52  
53  
54  
55  
56  
57  
58  
59  
60



- 1  
2  
3 28. Flather M, Shibata M, Coats A, *et al.* Randomised trial to determine the effect of  
4  
5 nebivolol on mortality and cardiovascular hospital admission in elderly  
6  
7 patients with heart failure (SENIORS). *Eur Heart J* 2005;26:215-25.  
8  
9  
10 29. Muntwyler J, Abetel G, Gruner C, *et al.* One-year mortality among unselected  
11  
12 outpatients with heart failure. *Eur Heart J* 2002;23:1861-66.  
13  
14 30. Holubarsch CJF, Colucci WS, Meinertz T, *et al.* Survival and prognosis:  
15  
16 investigation of crataegus extract WS 1442 in congestive heart failure (SPICE)  
17  
18 - rationale, study design and study protocol. *Eur J Heart Fail* 2000;2:431-37.  
19  
20  
21 31. Zick S, Gillespie B, Aaronson K. The effect of crataegus oxycantha special extract  
22  
23 WS 1442 on clinical progression in patients with mild to moderate symptoms  
24  
25 of heart failure. *Eur J Heart Fail* 2008;10:587-93.  
26  
27  
28 32. Zick S, Vautaw B, Gillespie B, *et al.* Hawthorn extract randomised blinded  
29  
30 chronic heart failure (HERB-CHF) trial. *Eur J Heart Fail* 2009;11:990-99.  
31  
32 33. Cowper PA, DeLong ER, Whellan DJ, *et al.* Economic effects of beta-blocker  
33  
34 therapy in patients with heart failure. *Am J Med* 2004;116:104-11.  
35  
36  
37 34. Victorian Department of Health. Victorian health services policy and funding  
38  
39 guidelines 2010-11 technical guidelines. Melbourne: Victorian Department of  
40  
41 Health, 2010.  
42  
43 35. Queensland Health. Casemix funding model 2008-2009: component prices  
44  
45 summary. Brisbane: Queensland Government, 2008.  
46  
47  
48 36. Australian Government Department of Health and Ageing. Medicare Benefits  
49  
50 Schedule (MBS) online. Canberra: Australian Government Department of  
51  
52 Health and Ageing, 2010.  
53  
54  
55  
56  
57  
58  
59  
60

- 1  
2  
3 37. Holubarsch CJF, Colucci WS, Meinertz T, *et al.* The efficacy and safety of  
4  
5 crataegus extract WS 1442 in patients with heart failure: the SPICE trial. *Eur J*  
6  
7 *Heart Fail* 2008;10:1255-63.  
8  
9  
10 38. Australian Government Department of Health and Ageing. Schedule of  
11  
12 pharmaceutical benefits. Canberra: Australian Government Department of  
13  
14 Health and Ageing, 2010.  
15  
16 39. Australian Bureau of Statistics. 3302.0 - Deaths, Australia, 2008, 2008.  
17  
18 40. Drummond MF, Sculpher MJ, Torrance GW, *et al.* *Methods for the economic*  
19  
20 *evaluation of health care programmes*. Third ed. Oxford: Oxford University  
21  
22 Press, 2007.  
23  
24  
25 41. Koller M, Lorenz W, Aubke W, *et al.* Crataegus special extract WS 1442 in the  
26  
27 treatment of early stages of CHD-associated heart failure *MMW Fortschr Med*  
28  
29 2006;148:42.  
30  
31  
32 42. Gohler A, Geisler BP, Manne J, *et al.* Utility estimates for decision-analytic  
33  
34 modelling in chronic heart failure: health states based on New York heart  
35  
36 association classes and number of rehospitalisations. *Value Health*  
37  
38 2009;12:185-87.  
39  
40  
41  
42  
43  
44  
45  
46  
47  
48  
49  
50  
51  
52  
53  
54  
55  
56  
57  
58  
59  
60

1  
2  
3  
4  
5  
6  
7  
8  
9  
10  
11  
12  
13  
14  
15  
16  
17  
18  
19  
20  
21  
22  
23  
24  
25  
26  
27  
28  
29  
30  
31  
32  
33  
34  
35  
36  
37  
38  
39  
40  
41  
42  
43  
44  
45  
46  
47  
48  
49  
50  
51  
52  
53  
54  
55  
56  
57  
58  
59  
60



Figure 1. Markov model and decision tree showing transitions between potential health states for chronic heart failure.

451x317mm (300 x 300 DPI)

View only

1  
2  
3  
4  
5  
6  
7  
8  
9  
10  
11  
12  
13  
14  
15  
16  
17  
18  
19  
20  
21  
22  
23  
24  
25  
26  
27  
28  
29  
30  
31  
32  
33  
34  
35  
36  
37  
38  
39  
40  
41  
42  
43  
44  
45  
46  
47  
48  
49  
50  
51  
52  
53  
54  
55  
56  
57  
58  
59  
60

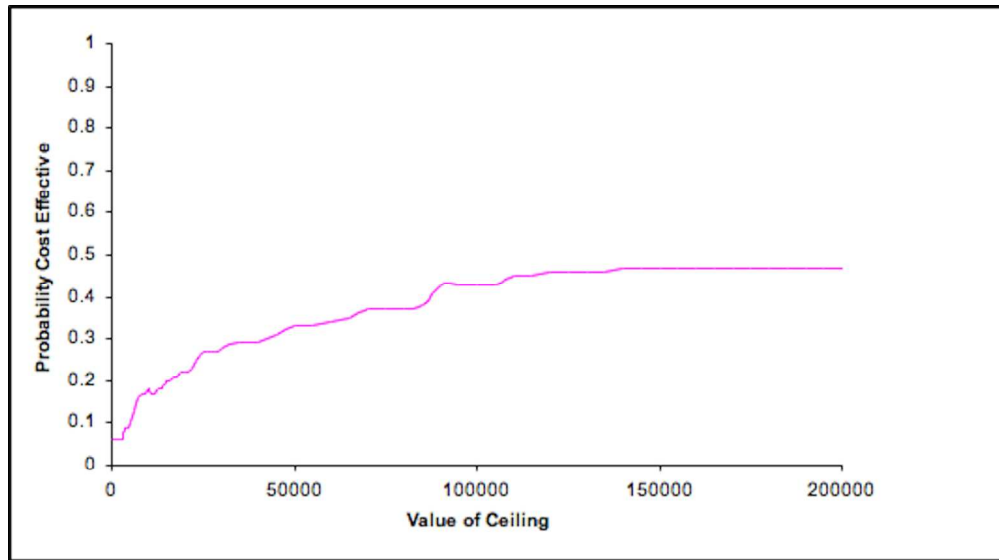

Figure 1. Cost-Effectiveness Acceptability Curve for the New Intervention 162x90mm (300 x 300 DPI)

review only

1  
2  
3  
4  
5  
6  
7  
8  
9  
10  
11  
12  
13  
14  
15  
16  
17  
18  
19  
20  
21  
22  
23  
24  
25  
26  
27  
28  
29  
30  
31  
32  
33  
34  
35  
36  
37  
38  
39  
40  
41  
42  
43  
44  
45  
46  
47  
48  
49  
50  
51  
52  
53  
54  
55  
56  
57  
58  
59  
60



Figure 1. Population Expected Value of Perfect Information (EVPI) Curve  
Note. The EVPI values have been divided by 1 million to make figure easier to read.

161x91mm (300 x 300 DPI)

Review only

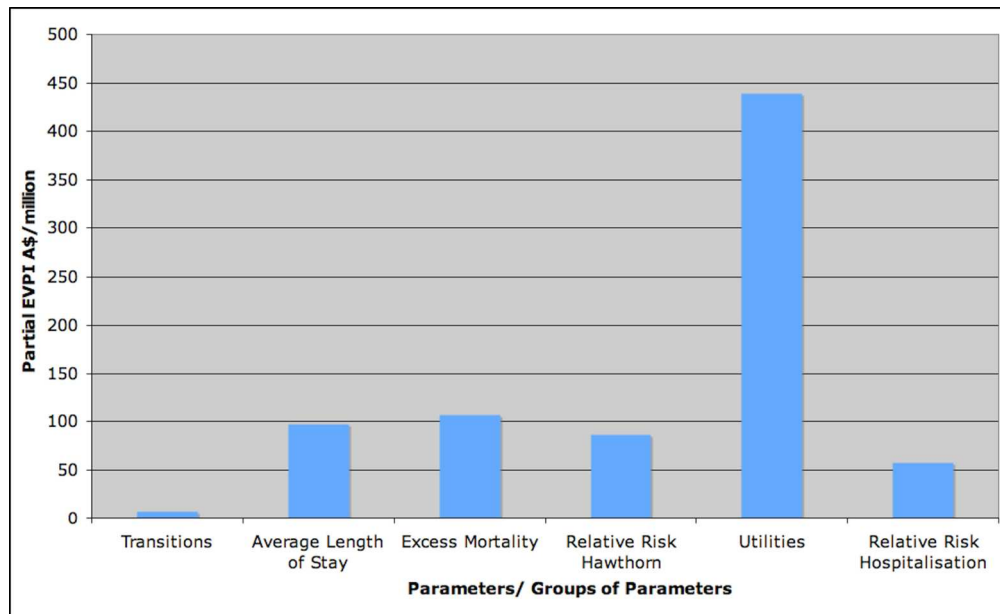

Figure 1. Expected Value of Perfect Information for Parameters  
 Note. The Partial EVPI values have been divided by 1 million to make figure easier to read.

149x91mm (300 x 300 DPI)

Review only

1  
2  
3  
4  
5  
6  
7  
8  
9  
10  
11  
12  
13  
14  
15  
16  
17  
18  
19  
20  
21  
22  
23  
24  
25  
26  
27  
28  
29  
30  
31  
32  
33  
34  
35  
36  
37  
38  
39  
40  
41  
42  
43  
44  
45  
46  
47  
48  
49  
50  
51  
52  
53  
54  
55  
56  
57  
58  
59  
60

## Appendix 1. Calculation of the Transition Probabilities for the Markov Model

| <i>transition matrix</i> | NYHA I | NYHA II | NYHA III | NYHA IV | Check |
|--------------------------|--------|---------|----------|---------|-------|
| NYHA I                   | 0.977  | 0.019   | 0.004    | 0.000   | 1.000 |
| NYHA II                  | 0.008  | 0.981   | 0.010    | 0.001   | 1.000 |
| NYHA III                 | 0.000  | 0.034   | 0.960    | 0.006   | 1.000 |
| NYHA IV                  | 0.000  | 0.000   | 0.055    | 0.945   | 1.000 |
|                          |        |         |          |         | 0.000 |

Probabilistic version

### 1. Observed counts

|          | NYHA I | NYHA II | NYHA III | NYHA IV | totals |
|----------|--------|---------|----------|---------|--------|
| NYHA I   | 59.597 | 1.159   | 0.244    | 0       | 61     |
| NYHA II  | 9.6    | 1177.2  | 12       | 1.2     | 1200   |
| NYHA III | 0      | 28.016  | 791.04   | 4.944   | 824    |
| NYHA IV  | 0      | 0       | 2.365    | 40.635  | 43     |
|          |        |         |          |         | 2128   |

### 2. Estimated probabilities

|          | NYHA I | NYHA II | NYHA III | NYHA IV | totals |
|----------|--------|---------|----------|---------|--------|
| NYHA I   | 0.977  | 0.019   | 0.004    | 0       | 1      |
| NYHA II  | 0.008  | 0.981   | 0.010    | 0.001   | 1      |
| NYHA III | 0      | 0.034   | 0.960    | 0.006   | 1      |
| NYHA IV  | 0      | 0       | 0.055    | 0.945   | 1      |

### 3. Random number table

|          | NYHA I | NYHA II | NYHA III | NYHA IV |
|----------|--------|---------|----------|---------|
| NYHA I   | 0.24   | 0.44    | 0.87     | 0.66    |
| NYHA II  | 0.91   | 0.62    | 0.99     | 0.21    |
| NYHA III | 0.72   | 0.91    | 0.27     | 0.46    |
| NYHA IV  | 0.26   | 0.18    | 0.92     | 0.46    |

### 4. Cumulative gamma/normal functions

|          | NYHA I | NYHA II  | NYHA III | NYHA IV | totals |
|----------|--------|----------|----------|---------|--------|
| NYHA I   | 53.905 | 0.730    | 0.568    | 0       | 55     |
| NYHA II  | 13.845 | 1188.106 | 20.983   | 0.342   | 1223   |
| NYHA III | 0      | 35.377   | 773.741  | 4.390   | 814    |
| NYHA IV  | 0      | 0        | 4.735    | 39.593  | 44     |

### 5. Random dirichlet probabilities

|          | NYHA I | NYHA II | NYHA III | NYHA IV | totals |
|----------|--------|---------|----------|---------|--------|
| NYHA I   | 0.976  | 0.013   | 0.010    | 0       | 1.00   |
| NYHA II  | 0.011  | 0.971   | 0.017    | 0.000   | 1.00   |
| NYHA III | 0      | 0.043   | 0.951    | 0.005   | 1.00   |
| NYHA IV  | 0      | 0       | 0.107    | 0.893   | 1.00   |

**Appendix 2. Cost-Effectiveness Plane Showing Cost and QALY Outcomes for Markov Model**



Point A = ICER

1  
2  
3  
4  
5  
6  
7  
8  
9  
10  
11  
12  
13  
14  
15  
16  
17  
18  
19  
20  
21  
22  
23  
24  
25  
26  
27  
28  
29  
30  
31  
32  
33  
34  
35  
36  
37  
38  
39  
40  
41  
42  
43  
44  
45  
46  
47  
48  
49



1  
2  
3  
4  
5  
6  
7  
8  
9  
10  
11  
12  
13  
14  
15  
16  
17  
18  
19  
20  
21  
22  
23  
24  
25  
26  
27  
28  
29  
30  
31  
32  
33  
34  
35  
36  
37  
38  
39  
40  
41  
42  
43  
44  
45  
46  
47  
48  
49

For peer review only

**Appendix 3. Histograms of Individual Parameters**

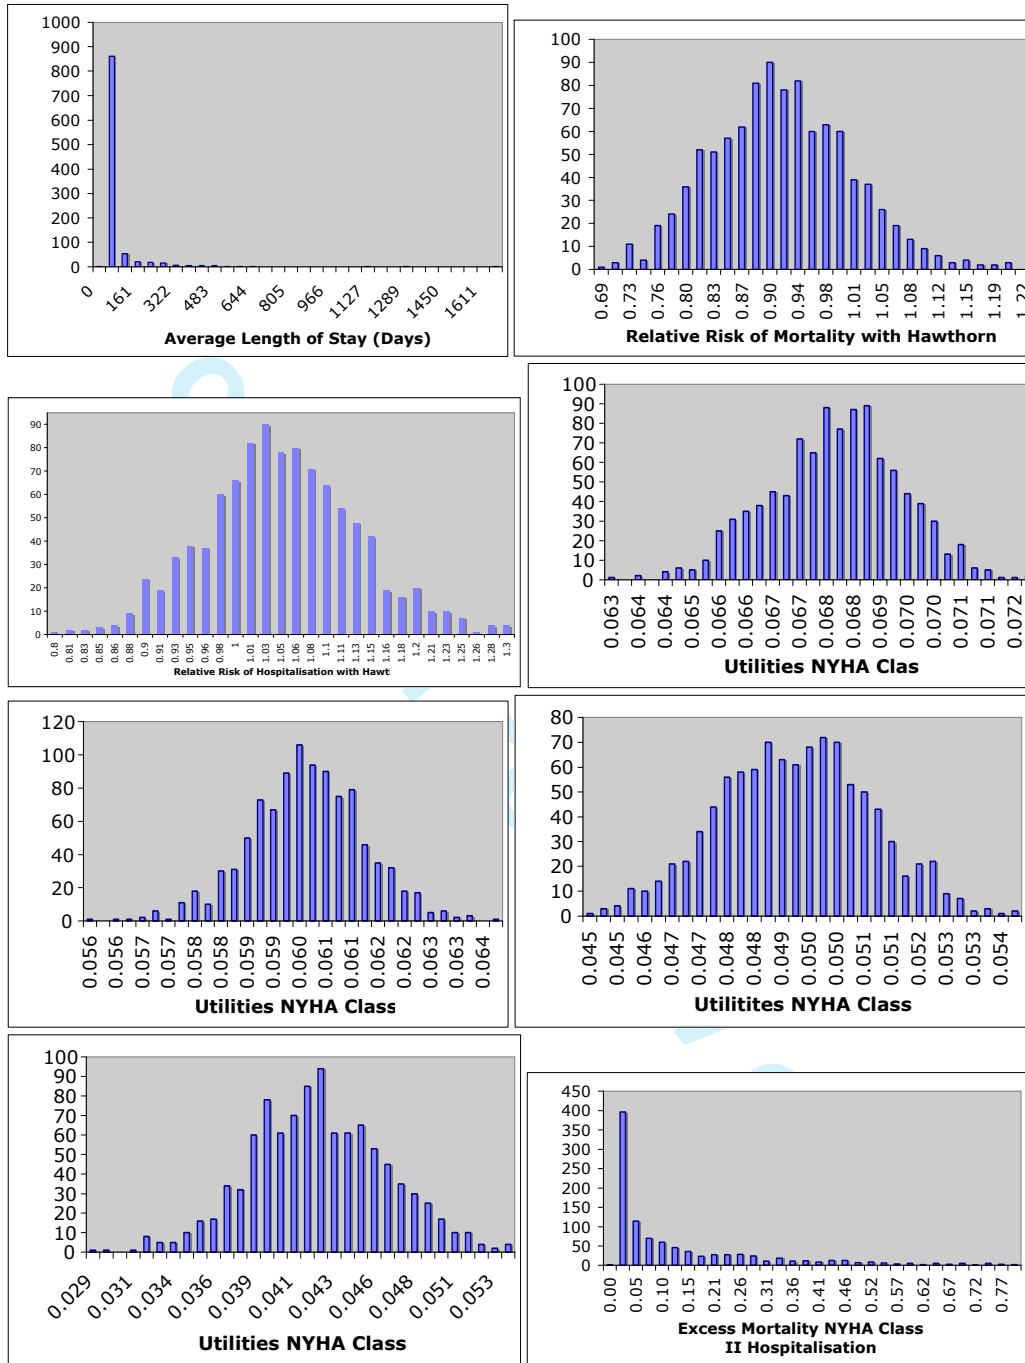

1  
2  
3  
4  
5  
6  
7  
8  
9  
10  
11  
12  
13  
14  
15  
16  
17  
18  
19  
20  
21  
22  
23  
24  
25  
26  
27  
28  
29  
30  
31  
32  
33  
34  
35  
36  
37  
38  
39  
40  
41  
42  
43  
44  
45  
46  
47  
48  
49  
50  
51  
52  
53  
54  
55  
56  
57  
58  
59  
60



1  
2  
3  
4  
5  
6  
7  
8  
9  
10  
11  
12  
13  
14  
15  
16  
17  
18  
19  
20  
21  
22  
23  
24  
25  
26  
27  
28  
29  
30  
31  
32  
33  
34  
35  
36  
37  
38  
39  
40  
41  
42  
43  
44  
45  
46  
47  
48  
49  
50  
51  
52  
53  
54  
55  
56  
57  
58  
59  
60

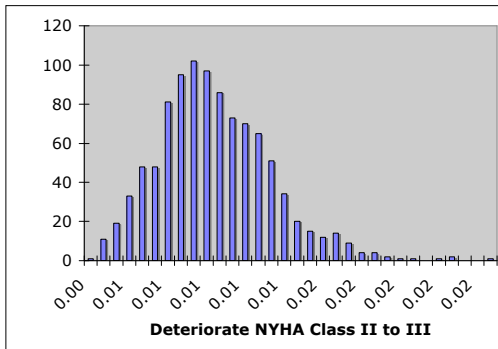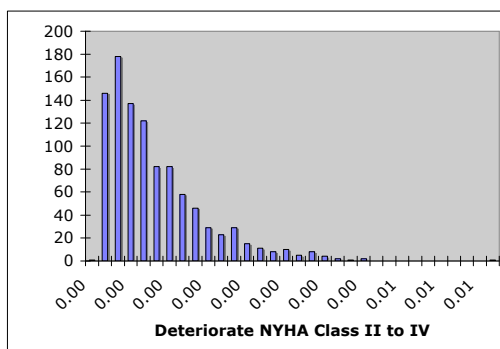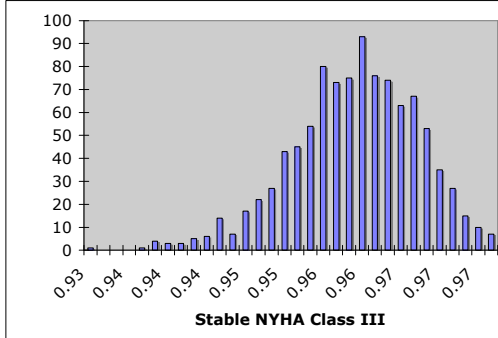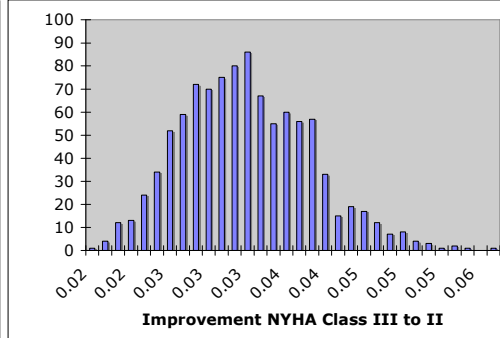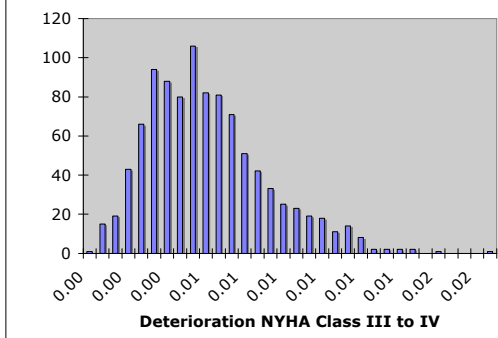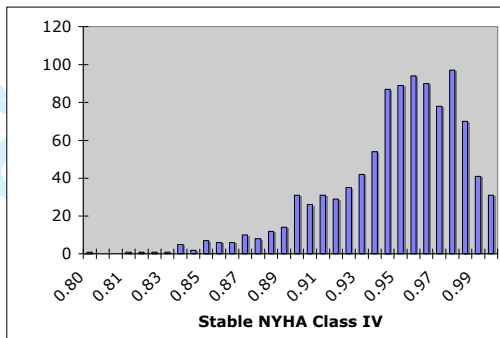

W Only

## EVEREST Statement: Checklist for health economics paper

|                                                                                                                                                | Study section            | Additional remarks                          |
|------------------------------------------------------------------------------------------------------------------------------------------------|--------------------------|---------------------------------------------|
| <b>Study design</b>                                                                                                                            |                          |                                             |
| (1) The research question is stated                                                                                                            | Introduction             |                                             |
| (2) The economic importance of the research question is stated                                                                                 | Introduction             |                                             |
| (3) The viewpoint(s) of the analysis are clearly stated and justified                                                                          | Introduction             |                                             |
| (4) The rationale for choosing the alternative programmes or interventions compared is stated                                                  | Introduction             |                                             |
| (5) The alternatives being compared are clearly described                                                                                      | Introduction;<br>Methods |                                             |
| (6) The form of economic evaluation used is stated                                                                                             | Introduction;<br>Methods |                                             |
| (7) The choice of form of economic evaluation is justified in relation to the questions addressed                                              | Methods;<br>Discussion   |                                             |
|                                                                                                                                                |                          |                                             |
| <b>Data collection</b>                                                                                                                         |                          |                                             |
| (8) The source(s) of effectiveness estimates used are stated                                                                                   | Methods                  | Presented in table form and in written form |
| (9) Details of the design and results of effectiveness study are given (if based on single study)                                              | N/A                      | Data derived from multiple sources          |
| (10) Details of the method of synthesis or meta-analysis of estimates are given (if based on an overview of a number of effectiveness studies) | N/A                      | Meta-analysis was not used                  |
| (11) The primary outcome measure(s) for the economic evaluation are clearly stated                                                             | Methods                  |                                             |
| (12) Methods to value health states and other benefits are stated                                                                              | Methods                  |                                             |
| (13) Details of the subjects from whom valuations were obtained are given                                                                      | N/A                      |                                             |
| (14) Productivity changes (if included) are reported separately                                                                                | N/A                      |                                             |
| (15) The relevance of productivity changes to the study question is discussed                                                                  | N/A                      |                                             |
| (16) Quantities of resources are reported separately from their unit costs                                                                     | Methods                  |                                             |
| (17) Methods for the estimation of quantities and unit costs are described                                                                     | Methods                  |                                             |
| (18) Currency and price data are recorded                                                                                                      | Methods                  |                                             |
| (19) Details of currency of price adjustments for                                                                                              | NA                       | As the study is                             |

|                                                                                          |                                           |                                                                                                |
|------------------------------------------------------------------------------------------|-------------------------------------------|------------------------------------------------------------------------------------------------|
| inflation or currency conversion are given                                               |                                           | looking for relative cost, then inflation would be comparable between the different treatments |
| (20) Details of any model used are given                                                 | Methods                                   |                                                                                                |
| (21) The choice of model used and the key parameters on which it is based are justified  | Methods                                   |                                                                                                |
|                                                                                          |                                           |                                                                                                |
| <b>Analysis and interpretation of results</b>                                            |                                           |                                                                                                |
| (22) Time horizon of costs and benefits is stated                                        | Methods-Model construction;<br>Discussion | Based on current cost estimates                                                                |
| (23) The discount rate(s) is stated                                                      | Methods                                   |                                                                                                |
| (24) The choice of rate(s) is justified                                                  | N/A                                       |                                                                                                |
| (25) An explanation is given if costs or benefits are not discounted                     | N/A                                       |                                                                                                |
| (26) Details of statistical tests and confidence intervals are given for stochastic data | N/A                                       |                                                                                                |
| (27) The approach to sensitivity analysis is given                                       | Methods                                   |                                                                                                |
| (28) The choice of variables for sensitivity analysis is justified                       | Methods                                   |                                                                                                |
| (29) The ranges over which the variables are varied are stated                           | Methods, Table 2                          |                                                                                                |
| (30) Relevant alternatives are compared                                                  | Methods                                   |                                                                                                |
| (31) Incremental analysis is reported                                                    | Results                                   |                                                                                                |
| (32) Major outcomes are presented in a disaggregated as well as aggregated form          | Results                                   |                                                                                                |
| (33) The answer to the study question is given                                           | Results<br>Discussion;<br>Conclusion      |                                                                                                |
| (34) Conclusions follow from the data reported                                           | Discussion;<br>Conclusion                 |                                                                                                |
| (35) Conclusions are accompanied by the appropriate caveats                              | Discussion;<br>Conclusion                 |                                                                                                |

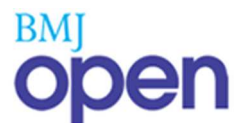

**Development of an Economic Model to Assess the Cost-Effectiveness of Hawthorn Extract as an Adjunct Treatment for Heart Failure in Australia**

|                                 |                                                                                                                                                                                            |
|---------------------------------|--------------------------------------------------------------------------------------------------------------------------------------------------------------------------------------------|
| Journal:                        | <i>BMJ Open</i>                                                                                                                                                                            |
| Manuscript ID:                  | bmjopen-2012-001094.R2                                                                                                                                                                     |
| Article Type:                   | Research                                                                                                                                                                                   |
| Date Submitted by the Author:   | 13-Jul-2012                                                                                                                                                                                |
| Complete List of Authors:       | Ford, Emily; University of Queensland, School of Population Health<br>Adams, Jon; University of Technology Sydney, Faculty of Nursing, Midwifery and Health<br>Graves, Nicholas; QUT, IHBI |
| <b>Primary Subject Heading</b>: | Health economics                                                                                                                                                                           |
| Secondary Subject Heading:      | Complementary medicine, Cardiovascular medicine                                                                                                                                            |
| Keywords:                       | HEALTH ECONOMICS, Heart failure < CARDIOLOGY, COMPLEMENTARY MEDICINE                                                                                                                       |
|                                 |                                                                                                                                                                                            |

SCHOLARONE™  
Manuscripts

1  
2  
3  
4  
5  
6  
7  
8  
9  
10  
11  
12  
13  
14  
15  
16  
17  
18  
19  
20  
21  
22  
23  
24  
25  
26  
27  
28  
29  
30  
31  
32  
33  
34  
35  
36  
37  
38  
39  
40  
41  
42  
43  
44  
45  
46  
47  
48  
49  
50  
51  
52  
53  
54  
55  
56  
57  
58  
59  
60

# Development of an Economic Model to Assess the Cost-Effectiveness of Hawthorn Extract as an Adjunct Treatment for Heart Failure in Australia

Emily Ford  
School of Population Health  
University of Queensland  
Brisbane, Australia  
Postal address: PO Box 9122  
Wynnum Plaza Queensland 4178  
[emily.ford1@uqconnect.edu.au](mailto:emily.ford1@uqconnect.edu.au)  
Ph +61 (0)7 3901 1429

Professor Jon Adams  
Professor of Public Health  
Faculty of Nursing, Midwifery and Health  
University of Technology  
Sydney, Australia  
and  
Honorary Professor of Sociology  
School of Social Science  
University of Queensland  
Brisbane  
Australia  
[Jon.adams@uts.edu.au](mailto:Jon.adams@uts.edu.au)

Professor Nicholas Graves  
Professor of Health Economics  
School of Public Health and Institute for Health & Biomedical Innovation  
Queensland University of Technology  
Brisbane, Australia  
[n.graves@qut.edu.au](mailto:n.graves@qut.edu.au)

Keywords: complementary therapies, heart failure, cost-benefit analysis, crataegus extract

Word count: 4546



## ABSTRACT

### Objective

An economic model was developed to evaluate the cost-effectiveness of hawthorn extract as an adjunctive treatment for heart failure in Australia.

### Methods

A Markov model of chronic heart failure was developed to compare the costs and outcomes of standard treatment and standard treatment with hawthorn extract. Health states were defined by the New York Heart Association (NYHA) classification system and death. For any given cycle patients could remain in the same NYHA class, experience an improvement or deterioration in NYHA class, be hospitalised or die. Model inputs were derived from the published medical literature, and the output was Quality Adjusted Life Years (QALYs). Probabilistic Sensitivity Analysis was conducted. The Expected Value of Perfect Information (EVPI) and the Expected Value of Partial Perfect Information (EVPPI) were conducted to establish the value of further research and the ideal target for such research.

### Results

Hawthorn extract increased costs by \$1866.78 and resulted in a gain of 0.02 QALYs. The incremental cost-effectiveness ratio was \$85,160.33 per QALY. The CEAC indicated at a threshold of \$40,000 the new treatment had a 0.29 probability of being cost-effective. The average incremental NMB was -\$1791.64, the average NMB for the standard treatment was \$92,067.49, and for hawthorn extract \$90,275.84.

Additional research is potentially cost-effective if research is not proposed to cost more than \$325 million. Utilities is the most important target parameter group for further research.

### Conclusions

Hawthorn extract is not currently considered to be cost-effective in as an adjunctive treatment for heart failure in Australia. Further research in the area of utilities is warranted.

## INTRODUCTION

Heart failure is a major public health concern for all Western countries<sup>1</sup>. In the United States and Europe it is the most common principal diagnosis for adults admitted to hospital aged 65 years and over. In the United States around 2% of the population have heart failure (approximately 5 million people), and each year there are 500,000 new cases diagnosed<sup>2</sup>. The estimated prevalence in Sweden is 1.5-2%, approximately 135,000 to 180,000 people<sup>3</sup>.

Australian data regarding the public health significance and epidemiology of heart failure is currently limited. Estimates rely on information from large-scale population studies conducted in the United States and Europe<sup>1</sup>. It is estimated there are approximately 300,000 Australians living with chronic heart failure, and approximately 30,000 new cases diagnosed each year, with incidence rates and prevalence rising significantly with age<sup>4,5</sup>. In Australia, chronic cardiovascular diseases are associated with health care costs of over five billion dollars, and estimates put the cost of heart failure at around one billion dollars<sup>6</sup>. The mortality, morbidity and health care costs of heart failure are therefore significant<sup>4</sup>.

Heart failure is a syndrome with a range of signs and symptoms, diagnosis is based on such signs and symptoms, including dyspnoea and fatigue, and appropriate investigations, such as echocardiogram, which confirm the presence or absence of heart failure and help determine its aetiology<sup>1</sup>.

Current treatment aims to relieve and stabilise symptoms and prolong survival by stopping, stabilizing or reversing the progression of heart failure<sup>7</sup>. There are a variety of strategies used in Australia, including non-pharmacological management, pharmacological management, lifestyle changes, and the use of supportive devices, surgery, and palliative care<sup>6,8</sup>. The pharmacological approach depends on the type of heart failure and extent of the symptoms.

Despite the availability of strategies to treat and manage the chronic disease, the disability and suffering associated with heart failure is devastating<sup>7</sup>. Given this, and the large economic burden, it is reasonable to examine options not currently

1  
2  
3 considered standard therapy. Research examining the use of complementary and  
4 alternative medicine, particularly the use of hawthorn extract is showing promising  
5 results.  
6  
7

8  
9  
10 Hawthorn extract is a popular herbal medicine used worldwide, particularly for its  
11 cardiovascular properties<sup>9</sup>. Hawthorn extract has positive inotropic, anti-  
12 inflammatory and anti-oxidative properties; causes peripheral and coronary  
13 vasodilation; and protects against ischaemia induced arrhythmias<sup>9</sup>. A recent  
14 systematic review concluded hawthorn extract can provide significant benefits to  
15 heart failure patients as an adjunct to conventional treatment and a recent cost-  
16 effectiveness study conducted in Germany concluded hawthorn is a cost-effective  
17 treatment option especially in the early stages of heart failure<sup>10-12</sup>.  
18  
19  
20  
21  
22  
23

24  
25 Economic evaluation is a structured method for examining the costs and  
26 consequences involved with alternative methods of treatments and/or programs, in  
27 order to inform which is the best alternative from a particular viewpoint<sup>13</sup>. The goal  
28 is to improve the use of health care resources and improve patient care<sup>14</sup>. When  
29 conducted rigorously, such formal analysis allows recommendation to be made with  
30 transparency regarding the methods, data sources and assumptions<sup>13</sup>. This further  
31 allows the process to be replicated, reviewed and even challenged.  
32  
33  
34  
35  
36

37  
38 Models allow complex situations to be organised into a single coherent form that can  
39 be used to make decisions based on comprehensive consideration of the alternative  
40 interventions by capturing the essential relationships between the factors included in  
41 the model and outcomes<sup>15 16</sup>. Markov models define diseases using clinically  
42 relevant and economically important health states, between which patients move  
43 based on the natural history of the disease, and to which cost and effectiveness  
44 outcomes are ascribed<sup>16</sup>.  
45  
46  
47  
48  
49

50  
51 There are numerous examples of cost-effectiveness modeling in heart failure that  
52 examine conventional medicine. Pharmacological, behavioural and surgical  
53 interventions have all been investigated and many found to be cost-effective<sup>17 18</sup>.  
54 Pharmacological agents that have cost-effectiveness evidence include angiotensin  
55 converting enzyme inhibitors (ACEIs), digoxin, and beta-blockers such as carvedilol  
56  
57  
58  
59  
60

1  
2  
3 and nebivolol. Multidisciplinary heart failure management, in the form of a team,  
4 usually made up of a nurse co-ordinator and support from medical staff and allied  
5 health including dieticians and physiotherapy, has also shown to be cost-effective  
6 through reductions in hospitalisation and length of stay<sup>17 19</sup>. Surgical options  
7 including heart transplant, through intensive education and maximal medical therapy,  
8 have demonstrated a range of cost-effectiveness values. Cardiac resynchronisation  
9 therapy with or without an implantable cardioverter-defibrillator, has shown to be  
10 cost-effective from a healthcare perspective<sup>17 20</sup>. Most of the recent evidence  
11 involves Markov modeling.  
12  
13  
14  
15  
16  
17  
18  
19

20 The increasing number of published health economic evaluations is not yet reflected  
21 in CAM<sup>21 22 23</sup>. A systematic review examined whether CAM demonstrated cost-  
22 effectiveness through economic evaluations<sup>24</sup>. There was good evidence for the cost-  
23 effectiveness of several therapies in comparison to usual care, acupuncture for  
24 migraine, manual therapy for neck pain, spa therapy for Parkinson's, self-administered  
25 stress management for cancer patients undergoing chemotherapy, pre- and post-  
26 operative oral nutritional supplementation for lower gastrointestinal tract surgery,  
27 biofeedback for patients with "functional" disorders (eg, irritable bowel syndrome),  
28 and guided imagery, relaxation therapy, and a potassium rich diet for cardiac patients  
29  
30  
31  
32  
33  
34  
35  
36  
37  
38  
39  
40  
41  
42  
43  
44  
45  
46  
47  
48  
49  
50  
51  
52  
53  
54  
55  
56  
57  
58  
59  
60

There remain very few full economic evaluations today. One such evaluation  
examined therapeutic massage, exercise, and lessons in the Alexander technique for  
treating persistent back pain<sup>25</sup>. Massage, lessons in the Alexander technique, and an  
exercise prescription all provided benefits to patients over a 12-month period. Six  
lessons in the Alexander technique combined with an exercise prescription was the  
most cost effective option for the NHS<sup>25</sup>. Some economic evaluations of CAM have  
incorporated decision modeling. Recently, the cost-effectiveness of adding  
acupuncture to usual care for chronic low back pain was examined, using a Markov  
model<sup>26</sup>. The result was an incremental cost per QALY gained of KRW 3,421,394,  
well below the threshold of KRW 20,000,000. Acupuncture plus usual care was more  
cost-effective than usual care for these patients. The probability of collaborative  
treatment being cost-effective was 72.3%. EVPI analysis suggested further research

1  
2  
3 was of reasonable value<sup>26</sup>. This highlights the need for full economic evaluations in  
4 many areas of CAM.  
5  
6

7  
8 The aim of this study was the construction and application of an economic decision  
9 model to evaluate hawthorn treatment as an adjunct to recommended pharmacological  
10 treatment versus recommended pharmacological management for chronic heart failure  
11 in Australia. The analysis has been conducted using a health sector perspective.  
12  
13

## 14 15 16 **METHODS**

### 17 18 **Model Description**

19 A four state Markov model of chronic heart failure was developed based on the New  
20 York Heart Association (NYHA) classification system using Microsoft Excel® (see  
21 Figure 1). Classes I to IV make up four discrete health states included in the model  
22 (See Table 1 for a description of the NYHA classes). A decision tree completes the  
23 model. Each NYHA class has its own decision tree. Within the decision tree  
24 patients could be hospitalised for worsening heart failure. Patients also either  
25 survived or died.  
26  
27  
28  
29  
30  
31

### 32 33 **Progression through the model**

34 A simulated cohort of 1000 patients aged 60 entered the model with NYHA class II  
35 heart failure and progressed through the model. Patients progress through the model  
36 in one month cycles for a duration of 5 years. After one month, patients either  
37 remained in NYHA class II or improved to NYHA class I or deteriorated.  
38 In turn, for each class of heart failure patients were either hospitalised or not  
39 hospitalised for worsening heart failure. Patients who were hospitalised or not  
40 hospitalised either survived or died. Death was a possibility from any class of heart  
41 failure. The patients accrued costs and benefits of treatment in each of the states for  
42 each cycle.  
43  
44  
45  
46  
47  
48  
49

50 Per patient costs were required for each NYHA class. Costs were assumed to  
51 be the same for standard treatment and standard treatment with hawthorn extract,  
52 except for the additional cost of hawthorn extract. Patient health was considered as a  
53 single index utility on a zero to one scale, where 0 represents death and 1 represents  
54  
55  
56  
57  
58  
59  
60

perfect health. This allows the calculation of Quality Adjusted Life Years (QALYs) when combined with the mortality data and the calculation of cost per QALY ratios.

Two cohorts were modeled, one receiving standard pharmacological treatment and the other receiving standard pharmacological treatment with hawthorn extract as an adjunct. The two cohorts will progress through the model in slightly different ways and as such there will be a difference in the accumulation of costs and QALYS. It is the differences in costs and QALYS that will determine the cost-effectiveness of hawthorn extract in addition to standard pharmacological treatment.

A discount rate of 3% per year was applied to the costs and benefits. This rate is a standard choice in the literature.

**Table 1. NYHA grading of symptoms in chronic heart failure.**

| NYHA Class | Description                                                                                                                                   |
|------------|-----------------------------------------------------------------------------------------------------------------------------------------------|
| Class I    | No symptoms and limitations in ordinary physical activity.                                                                                    |
| Class II   | Slight limitation of physical activity. Ordinary physical activity results in mild symptoms such as fatigue, shortness of breath, and angina. |
| Class III  | Marked limitation of physical activity. Less than ordinary physical activity leads to symptoms.                                               |
| Class IV   | Severely limited. Experiences symptoms even at rest.                                                                                          |

### Model Construction

#### Disease Progression

Transition probabilities for movement between NYHA classes of heart failure were estimated from the published literature detailing the large scale international Study of the Effects of Nebivolol Intervention on Outcomes and Re-hospitalisation in Seniors with Heart Failure (SENIORS) and personal correspondence with authors<sup>18,27</sup>. A thorough literature search was conducted to identify disease progression data for each NYHA class, between January 2004 and December 2009. Data was considered relevant if transition probabilities were provided for each NYHA class. The databases searched were Medline, CINAHL and the Cochrane Library. Search terms used included 'New York Heart Association', 'NYHA', 'NYHA class', 'class', 'Markov model', 'chronic heart failure', and 'heart failure'.

1  
2  
3 The search yielded a limited number of studies (17 in Medline, 3 in CINAHL and 3 in  
4 the Cochrane library), of which only the above study was considered suitable for  
5 inclusion.  
6

7  
8 Disease progression between the Markov states was assumed to be the same for  
9 standard treatment and for standard treatment with hawthorn extract, as we were  
10 unable to identify reliable data to indicate that hawthorn extract altered progression  
11 through the classes of heart failure. Transition probabilities were fixed over time. We  
12 have incorporated a difference in mortality and a difference in the hospitalisation rate  
13 between the standard treatment and the standard treatment with hawthorn extract as  
14 an adjunct, which in turn will impact on the cost and QALY outcomes.  
15  
16  
17  
18  
19

## 20 21 **Data Sources**

### 22 23 24 Mortality

25  
26 Baseline mortality was derived from Australian Bureau of Statistics general  
27 population mortality data.  
28

29  
30 Mortality data was of interest if it was provided for each NYHA class and if it  
31 concerned the excess mortality from heart failure and/or cardiovascular causes. The  
32 databases searched were Medline, CINAHL and the Cochrane Library, between  
33 January 2004 and December 2009. Search terms used included 'New York Heart  
34 Association', 'NYHA', 'NYHA class', 'class', 'Markov model', 'chronic heart  
35 failure', 'heart failure', 'mortality'. 83 papers were identified in Medline, 198 in  
36 CINAHL and 411 in Cochrane.  
37  
38  
39

40  
41 The mortality rate for cardiovascular causes was derived from the published literature  
42 detailing one-year mortality among unselected patients with NYHA class II-IV heart  
43 failure in Switzerland<sup>28</sup>. The mortality rate increased with progression from NYHA  
44 class I to NYHA class IV, and varied depending on whether the patient was  
45 hospitalised or not. A thorough search of the literature was made to identify data for  
46 each NYHA class individually, nothing was identified and the above study was the  
47 closest to ideal. Hospitalisation was considered a major factor in cost estimation, so  
48 data broken down by hospitalisation status was considered to represent the population  
49 of heart failure patients well. Also, unselected patients were considered to represent  
50 the patient cohort more accurately than studies that focused on hospitalised patients  
51  
52  
53  
54  
55  
56  
57  
58  
59  
60

1  
2  
3 only. As data for NYHA class I was not included, an assumption was made that  
4 mortality for NYHA class I was the same as the general population mortality.  
5  
6

#### 7 8 Health Status

9  
10 Estimates of health status were derived from the same source as the transition  
11 probabilities<sup>18 20</sup>. Data concerning utilities for heart failure is extremely limited, a  
12 study was identified that had specifically had developed utilities for heart failure in  
13 terms of both hospitalisation and NYHA class. However, we were unable to obtain  
14 the required data despite personal correspondence with the authors. The estimated  
15 health status was considered the next best data source.  
16  
17

18  
19 Health status was assumed to be the same for standard treatment and standard  
20 treatment with hawthorn extract. Hospitalisation was assumed to result in a health  
21 state lower than non-hospitalisation and a -0.1 disutility was applied to hospitalisation  
22 to reflect this.  
23  
24  
25  
26

#### 27 28 Effect of Hawthorn

29  
30 A literature search identified the existing research for the use of hawthorn extract in  
31 the treatment of heart failure, between January 2004 and January 2010. The search  
32 included electronic databases (Medline,(472 papers) AMED (129 papers), Econlit (0  
33 papers), CINAHL (15 papers), Cochrane Database of Systematic Reviews (71  
34 papers)), hand searches of the literature, including hard copies of journals, and a  
35 search of the reference lists of the articles and publications found through electronic  
36 and hand searches. Personal communication with authors and experts including  
37 manufacturers and researchers in the field was also necessary to identify other sources  
38 of information and research that may not have been found using any other methods.  
39  
40  
41  
42  
43  
44

45  
46 A wide range of search terms was used including: 'heart failure', 'chronic heart  
47 failure', 'systolic heart failure', and 'congestive heart failure', 'hawthorn',  
48 'Crataegus', 'Crataegus oxyacantha', 'Crataegus monogyna', 'whitethorn',  
49 'weissdorn', 'Crataegus laevigata', 'WS 1442', 'LI 132', 'complementary',  
50 'alternative', 'medicine' and 'therapy'. There were several studies written in German,  
51 these were translated into English and then examined.  
52  
53  
54  
55  
56  
57  
58  
59  
60



1  
2  
3 Publicly accessible trials registers were also searched, and information was current up  
4 to December 2011. The Australian New Zealand Clinical Trials Registry (ANZCTR)  
5 was searched, no studies were identified. The World Health Organisation  
6 International Clinical Trials Registry Platform was searched, no new relevant trials  
7 were identified. The search terms used were: 'hawthorn extract', 'hawthorn',  
8 'crataegus', 'WS1442', 'whitehorn', 'heart failure'.  
9  
10  
11  
12

13  
14 There were no planned exclusion criteria at this stage for the patient population as any  
15 of the studies found have the potential to contribute valuable information to inform  
16 the model development.  
17  
18  
19

20  
21 The relative risk of mortality and relative risk of hospitalisation with hawthorn extract  
22 was derived from the Survival and Prognosis: Investigation of Crataegus Extract WS  
23 1442 in congestive heart failure (SPICE) trial, a large scale, international, randomised,  
24 placebo-controlled, double-blind study designed to investigate the influence of  
25 hawthorn extract on mortality of patients with congestive heart failure NYHA class II  
26 and III with at least moderately impaired left ventricular function<sup>29</sup>. To date there  
27 have only been two studies to examine the effect of hawthorn extract on heart failure  
28 progression in terms of mortality and hospitalisation. Most studies have focused on  
29 symptoms and exercise capability. SPICE enrolled 2681 patients, and the Hawthorn  
30 Extract Randomised Blinded Chronic Heart Failure (HERB CHF) trial enrolled 120  
31 patients<sup>30 31</sup>. Meta-analysis was not considered appropriate, therefore the data from  
32 SPICE was incorporated into the model.  
33  
34  
35  
36  
37  
38  
39  
40  
41  
42

#### 43 Costs

44 No Australian data was available to estimate the hospitalisation rate and number of  
45 hospitalisations, this information was derived from a United States study<sup>32</sup>.  
46 The estimated length of stay in hospital data was obtained from Victorian Department  
47 of Health for 2010-2011, it was unavailable for each NYHA class, so it was assumed  
48 to be the same for all classes<sup>33</sup>.  
49  
50  
51

52 The cost of a hospital admission per day was derived from the Queensland  
53 Government/ Queensland Health Casemix Funding Model 2008-2009 Component  
54 Prices Summary (\$3,775 per day)<sup>34</sup>.  
55  
56  
57  
58  
59  
60

1  
2  
3 Outpatient costs included General Practitioner (GP) visits, pathology (urea, creatinine,  
4 electrolytes), echocardiograms, and specialist visits. Estimates of the number of GP  
5 and specialist visits came from a combination of Australian sources and overseas  
6 studies due to the difficulty in finding complete Australian estimates. It was  
7 estimated that NYHA class I had 6 GP visits per year, and the remaining NYHA  
8 classes had 12 visits per year at \$34.30 per visit. Pathology was assumed to be  
9 required every 3 months at a cost of \$17.80. An Echocardiogram was assumed to be  
10 performed every two years (\$230.65). A specialist visit was assumed to occur twice  
11 per year (\$290 initial visit, \$194 repeat visit). If hospitalized, it was assumed patients  
12 had an extra 3 specialist visits and 2 GP visits per year. The costs came directly from  
13 the Medicare Benefits Schedule and the Queensland Government/ Queensland Health  
14 Casemix Funding Model 2008-2009 Component Prices Summary<sup>34 35</sup>.

15  
16 The information for which medications are taken for each NYHA class have been  
17 taken from the National Heart Foundation guidelines for the treatment of chronic  
18 heart failure in Australia<sup>5</sup>. Information for the optimal dosages prescribed has been  
19 taken from the Australian Therapeutic Guidelines. Individual drug pricing was  
20 obtained from the most recently available online version of the Medicare Benefits  
21 Schedule. The initial version of the model has incorporated the assumption that  
22 medications are taken in 100% of patients and that dosing is optimal. The model  
23 however can be altered to consider different scenarios of medication prescription and  
24 consumption.

25  
26 The dosage was assumed to be 900mg daily, consistent with the dosage used in the  
27 two most recent trials of hawthorn extract, the SPICE trial and the HERB-CHF trial<sup>29</sup>  
28<sup>31 36</sup>. An online search was conducted for standardised monopreparations of hawthorn  
29 leaf with flower available for purchase. Cardiomax® retails for A\$25.95 for 30 x  
30 450mg tablets (this equates to a 15 day supply, the cost for one month is \$51.90).

31  
32 The transition parameters are listed in Table 2. The model parameters have been  
33 listed in Table 3. Appendix 1 details the calculation of transition probabilities for the  
34 model.  
35  
36  
37  
38  
39  
40  
41  
42  
43  
44  
45  
46  
47  
48  
49  
50  
51  
52  
53  
54  
55  
56  
57  
58  
59  
60

Table 2. Transition Parameters used in the Decision Model

| <b>Transition Matrix</b> | <b>NYHA I</b> | <b>NYHA II</b> | <b>NYHA III</b> | <b>NYHA IV</b> | <b>Distribution</b> |
|--------------------------|---------------|----------------|-----------------|----------------|---------------------|
| <b>NYHA I</b>            | 0.977         | 0.019          | 0.004           | 0.000          | Dirichlet           |
| <b>NYHA II</b>           | 0.008         | 0.981          | 0.010           | 0.001          | Dirichlet           |
| <b>NYHA III</b>          | 0.000         | 0.034          | 0.960           | 0.006          | Dirichlet           |
| <b>NYHA IV</b>           | 0.000         | 0.000          | 0.055           | 0.945          | Dirichlet           |

Table 3. Parameters used in the Decision Model

| <b>Probabilistic Parameters</b>                                    |                          |                           |                     |                  |
|--------------------------------------------------------------------|--------------------------|---------------------------|---------------------|------------------|
| <b>Parameter Description</b>                                       | <b>Baseline Estimate</b> | <b>Variation/ SE (SD)</b> | <b>Distribution</b> | <b>Reference</b> |
| <b>Hospitalisation</b>                                             |                          |                           |                     |                  |
| <b>Length of stay in hospital estimate</b>                         | 4.9 days                 | Alpha 0.1<br>Beta 316.81  | Gamma               | <sup>33</sup>    |
| <b>Relative Risk of Hospitalisation with Hawthorn Extract</b>      | 1.03651200               | 0.080800494               | Lognormal           | <sup>36</sup>    |
| <b>Mortality</b>                                                   |                          |                           |                     |                  |
| <b>Excess Mortality</b>                                            |                          |                           | Beta                | <sup>28</sup>    |
| probability of excess mortality given hospitalisation class II     | 0.01087776               | Alpha 0.35916667          | Beta 2.55750000     |                  |
| probability of excess mortality given no hospitalisation class II  | 0.002620782              | Alpha 0.43166667          | Beta 13.485000      |                  |
| probability of excess mortality given hospitalisation class III    | 0.01791369               | Alpha 0.79666667          | Beta 3.28666667     |                  |
| probability of excess mortality given no hospitalisation class III | 0.00674466               | Alpha 0.72833333          | Beta 8.60500000     |                  |
| probability of excess mortality given hospitalisation class IV     | 0.05333974               | Alpha 0.96416667          | Beta 1.03583333     |                  |
| probability of excess mortality given no hospitalisation class IV  | 0.00719464               | Alpha 0.16583333          | Beta 1.83416667     |                  |
| <b>Relative Risk of Mortality with</b>                             | 0.90336300               | 0.09507420                | Lognormal           | <sup>36</sup>    |

| <b>Hawthorn Extract</b>                             |                     |                      |                       |                      |
|-----------------------------------------------------|---------------------|----------------------|-----------------------|----------------------|
| <b>Utility</b>                                      |                     |                      | Beta                  | <sup>18</sup>        |
| Utility of NYHA class I no hospitalisation          | 0.815               | Alpha 395.88         | Beta 89.86            |                      |
| Utility of NYHA class II no hospitalisation         | 0.72                | Alpha 661.95         | Beta 257.42           |                      |
| Utility of NYHA class III no hospitalisation        | 0.59                | Alpha 359.8075       | Beta 250.0357         |                      |
| Utility of NYHA class IV no hospitalisation         | 0.508               | Alpha 51.77          | Beta 50.1394          |                      |
| <b>Fixed Parameters</b>                             |                     |                      |                       |                      |
| <b>Parameter Description</b>                        | <b>NYHA class I</b> | <b>NYHA class II</b> | <b>NYHA class III</b> | <b>NYHA class IV</b> |
| <b>Hospitalisation</b>                              |                     |                      |                       | <sup>32</sup>        |
| Probability for hospitalisation                     | 0.01518800          | 0.02397800           | 0.02397800            | 0.15397000           |
| Probability no hospitalisation                      | 0.98481200          | 0.97602200           | 0.97602200            | 0.84603000           |
| <b>Costs</b>                                        |                     |                      |                       | <sup>34 35 37</sup>  |
| Cost of hospitalisation                             | \$2,957.08          | \$4,435.63           | \$4,435.63            | \$5,914.17           |
| Total cost for each NYHA class with hospitalisation | \$3,141.60          | \$4,639.95           | \$4,684.53            | \$6,176.17           |
| Cost of each class with no hospitalisation          | \$130.30            | \$150.11             | \$194.69              | \$207.79             |
| <b>Mortality</b>                                    |                     |                      |                       | <sup>38</sup>        |
| <b>Standardised Death Rate</b>                      | 6.0 per 1000        | 6.0 per 1000         | 6.0 per 1000          | 6.0 per 1000         |

### Probabilistic Sensitivity Analysis

Uncertainty is addressed in the model using probabilistic sensitivity analysis. Statistical distributions were assigned to key model parameters to examine second-order uncertainty in the estimation of the parameter. Uncertainty was propagated through the model using Monte Carlo simulation, drawing parameter values at random 1000 times from the particular distributions. This generates a joint density of cost and QALY outcomes that summarises uncertainty in all model parameters.

### Net Monetary Benefit

The incremental net monetary benefit was calculated. The difference between the average net benefit of the standard treatment and the average net benefit of the standard treatment with hawthorn as an adjunct is equal to the incremental net benefit.

1  
2  
3 The net benefit for each treatment is the increase in effectiveness multiplied by the  
4 amount the decision maker is willing to pay per QALY (\$40,000), less the increase in  
5 cost.  
6  
7

### 8 9 10 **The Expected Value of Perfect Information/ Expected Value of Partial Perfect** 11 **Information (EVPI/ EVPPI)** 12

13 The results of the modeling will indicate whether, based on the currently available  
14 information, the new treatment should be recommended. This decision is always  
15 associated with a level of uncertainty, which raises the question of whether it is  
16 appropriate to conduct further research to better examine the potential value of the  
17 new treatment, and whether we can identify where this research needs to be directed.  
18 EVPI and EVPPI analysis have been used to address these questions.  
19  
20  
21  
22

23  
24 EVPI analysis is a combination of the cost of making the wrong decision in terms of  
25 forgone health benefit and wasted resources, and the probability of making a wrong  
26 decision. This equates to the expected cost of uncertainty. With all uncertainty  
27 removed there would be economic savings from making the best decision and EVPI is  
28 a monetary value of these savings. EVPI provides an upper bound for spending on  
29 further research that reduces uncertainty in the decision. EVPPI follows the same  
30 principles, but examines individual parameters<sup>39</sup>.  
31  
32  
33  
34  
35  
36  
37

38 For the model it has been assumed the life of technology is 10 years and the number  
39 of eligible patients per annum has been estimated at 30, 000. This estimate is derived  
40 from the estimate of 30, 000 new cases of chronic heart failure per annum.  
41  
42  
43

## 44 **RESULTS**

45  
46 For the standard treatment and standard treatment with hawthorn extract as an adjunct  
47 the total cost per patient was \$4,887.82 and \$6754.59 QALYs were 2.40 and 2.42  
48 respectively. This was an incremental cost of \$1866.78 and 0.02 QALYs, and the  
49 incremental cost-effectiveness ratio was \$85,160.33 per QALY. A Cost-  
50 Effectiveness Plane shows the joint density of cost and QALY outcomes from the  
51 Monte Carlo simulations (See Figure 2). In Figure 2, point A is the ICER. The  
52  
53  
54  
55  
56  
57  
58  
59  
60

1  
2  
3 variation in the model parameters can be seen in a series of histograms for each of the  
4 probabilistic parameters (See Appendix 2).  
5  
6  
7

### 8 **Cost-Effectiveness Acceptability Curve (CEAC)**

9  
10 Figure 3 shows the uncertainty around this estimate as a cost-effectiveness  
11 acceptability curve (CEAC). At a willingness to pay threshold of \$40,000, the  
12 treatment with hawthorn extract has a 0.29 probability of being cost-effective. The  
13 probability of being cost effective rises as the willingness to pay threshold rises, for a  
14 threshold between \$500,000 and \$1,000,000 the probability is 0.48.  
15  
16  
17  
18

### 19 **Net Monetary Benefit (NMB)**

20 For a threshold of \$40,000, the average incremental NMB is -\$1791.64, the average  
21 NMB for the standard treatment is \$92,067.49, and for the standard treatment with  
22 hawthorn as an adjunct \$90,275.84. The treatment with hawthorn extract has a  
23 negative incremental net benefit, and would not offer good value for money for a  
24 decision maker.  
25  
26  
27  
28  
29

### 30 **Expected Value of Perfect Information (EVPI)**

31  
32 The population EVPI has been plotted in Figure 4 for a cost-effectiveness threshold  
33 between \$0 and \$200, 000 per QALY. The threshold was continued in the analysis up  
34 to a threshold of \$500,000 per QALY, however this did not alter the slope of the  
35 curve, so the results up to \$200, 000 have been shown.  
36  
37  
38  
39

40  
41 If the population EVPI represented in Figure 4 exceeds the expected costs of  
42 additional research, then it is potentially cost-effective to conduct further research.  
43  
44

45  
46 At a threshold of \$40,000 additional research is potentially cost-effective if research is  
47 not proposed to cost more than \$325 million.  
48  
49

50  
51 If we proposed additional research would cost \$100 million, it can be seen from  
52 Figure 4 that this research would be potentially cost-effective at a threshold of just  
53 under \$16,000. Even at a threshold of \$0 per QALY research would potentially be  
54 cost-effective as long as the cost of research did not exceed \$15 million.  
55  
56  
57  
58  
59  
60

The EVPI has indicated further research is potentially cost-effective. The Expected Value of Partial Perfect Information (EVPPPI) was examined to establish where further research would be of most benefit.

### **The Expected Value of Partial Perfect Information (EVPPPI)**

The EVPPPI was examined for six parameters/ groups of parameters, Transitions, Average Length of stay, Excess Mortality (cardiovascular mortality), Relative Risk of Hawthorn, Utilities, and the Relative Risk of Hospitalisation.

The results of the EVPPPI analysis can be seen in Figure 5 (and Table 4). From both the table and figure it can be seen that all parameters and parameter groups have significant EVPPPI, but the impact varies. Utilities (\$439,471,050.98) has the highest EVPPPI, and is therefore the most important target parameter/ parameter group for further research.

**Table 4. Partial EVPI Values for Parameters/ Parameter Groups**

| Parameters                    | Partial EVPI     |
|-------------------------------|------------------|
| Transitions                   | \$7,153,571.92   |
| Average Length of stay        | \$96,900,062.41  |
| Excess Mortality              | \$105,833,952.26 |
| Relative Risk Hawthorn        | \$86,323,972.20  |
| Utilities                     | \$439,471,050.98 |
| Relative Risk Hospitalisation | \$56,991,399.70  |

## **DISCUSSION**

In this modelling study we examined the cost-effectiveness of hawthorn extract in addition to standard treatment for heart failure in Australia. This treatment is not considered cost-effective given the current evidence. This is the first known attempt to examine the cost-effectiveness of hawthorn extract in addition to standard pharmacological treatment of chronic heart failure in Australia. Economic evaluation has been conducted examining hawthorn extract and standard heart failure treatment in Germany and this research indicates hawthorn extract was cost-effective in the

1  
2  
3 study context, however, these studies were not considered rigorous enough for the  
4 data to be used in this study<sup>10 40</sup>.

5  
6  
7  
8 EVPI analysis indicated that further research was likely to be of benefit, and EVPPI  
9 analysis indicated that research ideally should be targeted toward Utilities. The  
10 potential costs of further research and the particular type or types that may be required  
11 are of crucial importance to the final decision. Further research to examine Utilities  
12 will likely rely on primary data from randomized controlled trials such as the  
13 Eplerenone Post-acute Myocardial Infarction Heart Failure Efficacy and Survival  
14 Study (EPHESUS) and the Study of the Effects of Nebivolol Intervention on  
15 Outcomes and Rehospitalisation in Seniors with Heart Failure Study (SENIORS)<sup>18 41</sup>.  
16 Alternatively such research would require the initiation of novel research with utilities  
17 as a main outcome. This is costly research and this would certainly need to be  
18 estimated before any research was undertaken.  
19  
20  
21  
22  
23  
24  
25  
26  
27

28 The models in any area of health vary in terms of the Markov states chosen, for  
29 example when representing the severity of heart failure, hospitalisations and NYHA  
30 classes of heart failure are both utilised. It is difficult to summarise the multitude of  
31 evidence and compare models as different model structures and methods are used,  
32 which potentially leads to different outcomes<sup>42</sup>.  
33  
34  
35  
36  
37

38 The literature searches conducted for this study were comprehensive, although not to  
39 the standard of a systematic review. It is also often seen that the keywords chosen for  
40 CAM studies are not always uniform. The combination of these two factors may  
41 mean we have missed some of the research available. Our search was not reliant on  
42 databases alone, much of our information came from personal correspondence and a  
43 thorough search of reference lists, minimizing the impact of the above limitations.  
44  
45  
46  
47  
48

49 A limitation of this study was the relatively sparse data available for the Australian  
50 context. There is scarce data on the incidence and prevalence of heart failure.  
51 Estimates rely on information from a small number of large-scale population studies  
52 conducted in the United States and Europe<sup>1</sup>. The study of mortality in Australia is  
53 complex, heart failure is considered a 'mode of death' not a 'cause of death'. Studies  
54 examining mortality in terms of the underlying cause of death risk underestimating  
55  
56  
57  
58  
59  
60



1  
2  
3 mortality with condition such as heart failure. Mortality statistics are complicated by  
4 multiple co-morbidities, which make the underlying cause of death difficult to  
5 identify. Lack of consensus about the diagnosis of heart failure also complicates  
6 recording of the cause of death, indeed complicating any examination of heart failure.  
7  
8 It is difficult to isolate costs for heart failure. Heart failure is grouped by the  
9 Australian Institute of Health and Welfare as an 'other cardiovascular disease'. The  
10 exact contribution of heart failure to the burden of cardiovascular disease is at best an  
11 estimate.  
12  
13  
14  
15  
16  
17

18 Another limitation was the availability of evidence of the effectiveness of hawthorn  
19 extract. There are numerous studies supporting its use, however, very few studies that  
20 examine final outcomes such as hospitalisation and mortality<sup>12,30,32</sup>. Previously  
21 conducted studies focus on reported outcomes including maximal workload, exercise  
22 tolerance, pressure-heart rate product, 6-min walk test, and left-ventricular ejection  
23 fraction. There are suggestions in the literature that the use of hawthorn extract can  
24 actually decrease the use of standard pharmacological therapy and alter the  
25 progression of heart failure, but little rigorous evidence to support this<sup>10</sup>. If the use of  
26 standard pharmaceuticals was decreased, and/or disease progression was altered and  
27 patients improved their NYHA class to a greater extent or remained in the less  
28 symptomatic classes for longer this would decrease costs and potentially change the  
29 cost-effectiveness in favour of adding hawthorn extract as an adjunct to standard  
30 pharmacological treatment.  
31  
32  
33  
34  
35  
36  
37  
38  
39  
40

41 Should further evidence become available, the model can easily be updated and the  
42 results re-examined.  
43  
44

## 45 **CONCLUSION**

46  
47 Our analysis indicates that based on currently available evidence, hawthorn extract is  
48 not cost-effective in addition to standard pharmacological treatment for chronic heart  
49 failure in Australia. EVPI and EVPPI analysis indicates that further research is  
50 warranted, particularly in the area of utilities, pending an assessment of the estimated  
51 costs of such research.  
52  
53  
54  
55  
56  
57  
58  
59  
60

1  
2  
3 **Funding** This research received no specific grant from any funding agency in the  
4 public, commercial or not-for-profit sectors.  
5  
6

7  
8 **Competing Interests** None.  
9

10  
11 **Contributors** EF, NG and JA were responsible for the conception and design of the  
12 research. EF carried out the data collection and economic analysis. EF was  
13 responsible for the original draft. All authors contributed equally to all other aspects  
14 including drafting and revising, and approved the final manuscript.  
15  
16  
17  
18  
19  
20  
21  
22  
23  
24  
25  
26  
27  
28  
29  
30  
31  
32  
33  
34  
35  
36  
37  
38  
39  
40  
41  
42  
43  
44  
45  
46  
47  
48  
49  
50  
51  
52  
53  
54  
55  
56  
57  
58  
59  
60

**REFERENCES**

1. Krum H, Stewart S. Chronic heart failure: time to recognise this major public health problem. *Med J Aust* 2006;184:147-48.
2. McLean AS, Eslick GD, Coats AJS. The epidemiology of heart failure in Australia. *Int J Cardiol* 2007;118:370-74.
3. Agvall B, Borgquist L, Foldevi M, et al. Cost of heart failure in Swedish primary healthcare. *Scand J Prim Health* 2005;23:227-32.
4. Australian Institute of Health and Welfare. Heart failure: what of the future? Cat. No. AUS 34. Canberra: AIHW, 2003.
5. National Heart Foundation of Australia and the Cardiac Society of Australia and New Zealand (Chronic Heart Failure Guidelines Expert Writing Panel). Guidelines for the prevention, detection and management of chronic heart failure in Australia, 2006., 2006.
6. Krum H, Jelinek MV, Stewart S, et al. Guidelines for the prevention, detection and management of people with chronic heart failure in Australia in 2006. *Med J Aust* 2006;185:549-56.
7. Kaye DM, Krum H. Drug discovery for heart failure: a new era or the end of the pipeline? *Nat Rev Drug Discov* 2007;6:127-39.
8. Quinn B. Pharmacological treatment of heart failure. *Crit Care Nurs Q* 2007;30:299-306.
9. Furey A, Tassell M. Towards a scientific approach in the assessment of efficacy of an herbal preparation: hawthorn (*Crataegus* spp.). *Eur J Heart Fail* 2008;10:1153-57.

- 1  
2  
3 10. Habs M. Prospective, comparative cohort studies and their contribution to the  
4  
5 benefit assessments of therapeutic options: heart failure treatment with and  
6  
7 without hawthorn special extract WS 1442. *Forsch Komp Klas Nat*  
8  
9 2004;11:36-39.
- 10  
11 11. Pittler MH, Schmidt K, Ernst E. Hawthorn extract for treating chronic heart  
12  
13 failure: meta-analysis of randomised trials. *Am J Med* 2003;114:665-74.
- 14  
15 12. Guo R, Pittler MH, Ernst E. Hawthorn extract for treating chronic heart failure  
16  
17 (Review). *Cochrane Database Syst Rev* 2009; Issue 1. Art No: CD005312.  
18  
19 DOI: 10.1002/14651858.CD005312.pub2.
- 20  
21 13. Griffin S, Claxton K, Sculpher M. Decision analysis for resource allocation in  
22  
23 health care. *J Health Serv Res Po* 2008; 13:23-30.
- 24  
25 14. Kymes S. An introduction to decision analysis in the economic evaluation of the  
26  
27 prevention and treatment of vision-related diseases. *Ophthal Epidemiol*  
28  
29 2008;15:76-83.
- 30  
31 15. Buxton MJ, Drummond MF, Van Hout BA, *et al.* Modelling in economic  
32  
33 evaluation: an unavoidable fact of life. *Health Econ* 1997;6:217-27.
- 34  
35 16. Spencer M, Briggs A, Grossman R, *et al.* Development of an economic model to  
36  
37 assess the cost effectiveness of treatment interventions for chronic obstructive  
38  
39 pulmonary disease. *Pharmacoeconomics* 2005;23:619-37.
- 40  
41 17. Rich MW, Nease RF. Cost-effectiveness analysis in clinical practice: the case of  
42  
43 heart failure *Arch Intern Med* 1999;159:1690-700.
- 44  
45 18. Yao G, Freemantle N, Flather M, *et al.* Long-term cost-effectiveness analysis of  
46  
47 nebivolol compared with standard care in elderly patients with heart failure: an  
48  
49 individual patient-based simulation model. *Pharmacoeconomics* 2008;26:879-  
50  
51 89.
- 52  
53  
54  
55  
56  
57  
58  
59  
60

- 1  
2  
3 19. Miller G, Randolph S, Forkner E, *et al.* Long-term cost-effectiveness of disease  
4  
5 management in systolic heart failure. *Med Decis Making OnlineFirst* 2009.  
6
- 7 20. Yao G, Freemantle N, Calvert M, *et al.* The long-term cost-effectiveness of  
8  
9 cardiac resynchronization therapy with or without an implantable cardioverter-  
10  
11 defibrillator. *Eur Heart J* 2007;28:42-51.  
12
- 13 21. Canter P, Thompson-Coon J, Ernst E. Cost effectiveness of complementary  
14  
15 treatments in the United Kingdom: a systematic review. *Brit Med J*  
16  
17 2005;331:880-81.  
18  
19
- 20 22. Dalziel K, Segal L, Mortimer D. Review of Australian health economic evaluation  
21  
22 - 245 interventions: what can we say about cost effectiveness? *Cost Eff Resour*  
23  
24 *Alloc* 2008;6:9.  
25  
26
- 27 23. Thompson T, Feder G. Complementary therapies and the NHS: uncertain  
28  
29 evidence of cost effectiveness should not exclude complementary medicine  
30  
31 from reviews and guidelines. *Brit Med J* 2005;331:856-57.  
32  
33
- 34 24. Herman P, Craig B, Caspi O. Is complementary and alternative medicine (CAM)  
35  
36 cost-effective? A systematic review. *BMC Complem Altern M* 2005;5:11.  
37  
38
- 39 25. Hollinghurst S, Sharp D, Ballard K, *et al.* Randomised controlled trial of  
40  
41 Alexander technique lessons, exercise, and massage (ATEAM) for chronic  
42  
43 and recurrent back pain: economic evaluation. *Brit Med J Online First*  
44  
45 2008;337:a2656.  
46
- 47 26. Kim N, Yang B, Lee T, *et al.* An economic analysis of usual care and acupuncture  
48  
49 collaborative treatment on chronic low back pain: a Markov model decision  
50  
51 analysis. *BMC Complem Altern M* 2010;10:274.  
52  
53  
54  
55  
56  
57  
58  
59  
60

- 1  
2  
3 27. Flather M, Shibata M, Coats A, *et al.* Randomised trial to determine the effect of  
4  
5 nebivolol on mortality and cardiovascular hospital admission in elderly  
6  
7 patients with heart failure (SENIORS). *Eur Heart J* 2005;26:215-25.  
8  
9  
10 28. Muntwyler J, Abetel G, Gruner C, *et al.* One-year mortality among unselected  
11  
12 outpatients with heart failure. *Eur Heart J* 2002;23:1861-66.  
13  
14 29. Holubarsch CJF, Colucci WS, Meinertz T, *et al.* Survival and prognosis:  
15  
16 investigation of crataegus extract WS 1442 in congestive heart failure (SPICE)  
17  
18 - rationale, study design and study protocol. *Eur J Heart Fail* 2000;2:431-37.  
19  
20  
21 30. Zick S, Gillespie B, Aaronson K. The effect of crataegus oxycantha special extract  
22  
23 WS 1442 on clinical progression in patients with mild to moderate symptoms  
24  
25 of heart failure. *Eur J Heart Fail* 2008;10:587-93.  
26  
27  
28 31. Zick S, Vautaw B, Gillespie B, *et al.* Hawthorn extract randomised blinded  
29  
30 chronic heart failure (HERB-CHF) trial. *Eur J Heart Fail* 2009;11:990-99.  
31  
32 32. Cowper PA, DeLong ER, Whellan DJ, *et al.* Economic effects of beta-blocker  
33  
34 therapy in patients with heart failure. *Am J Med* 2004;116:104-11.  
35  
36  
37 33. Victorian Department of Health. Victorian health services policy and funding  
38  
39 guidelines 2010-11 technical guidelines. Melbourne: Victorian Department of  
40  
41 Health, 2010.  
42  
43 34. Queensland Health. Casemix funding model 2008-2009: component prices  
44  
45 summary. Brisbane: Queensland Government, 2008.  
46  
47  
48 35. Australian Government Department of Health and Ageing. Medicare Benefits  
49  
50 Schedule (MBS) online. Canberra: Australian Government Department of  
51  
52 Health and Ageing, 2010.  
53  
54  
55  
56  
57  
58  
59  
60

- 1  
2  
3 36. Holubarsch CJF, Colucci WS, Meinertz T, *et al.* The efficacy and safety of  
4 crataegus extract WS 1442 in patients with heart failure: the SPICE trial. *Eur J*  
5 *Heart Fail* 2008;10:1255-63.  
6  
7  
8  
9  
10 37. Australian Government Department of Health and Ageing. Schedule of  
11 pharmaceutical benefits. Canberra: Australian Government Department of  
12 Health and Ageing, 2010.  
13  
14  
15  
16 38. Australian Bureau of Statistics. 3302.0 - Deaths, Australia, 2008, 2008.  
17  
18  
19 39. Drummond MF, Sculpher MJ, Torrance GW, *et al.* *Methods for the economic*  
20 *evaluation of health care programmes*. Third ed. Oxford: Oxford University  
21 Press, 2007.  
22  
23  
24  
25 40. Koller M, Lorenz W, Aubke W, *et al.* Crataegus special extract WS 1442 in the  
26 treatment of early stages of CHD-associated heart failure *MMW Fortschr Med*  
27 2006;148:42.  
28  
29  
30  
31 41. Gohler A, Geisler BP, Manne J, *et al.* Utility estimates for decision-analytic  
32 modelling in chronic heart failure: health states based on New York heart  
33 association classes and number of rehospitalisations. *Value Health*  
34 2009;12:185-87.  
35  
36  
37  
38  
39  
40 42. Turner D, Raftery J, Cooper K, *et al.* The CHD challenge: Comparing four cost-  
41 effectiveness models. *Value Health* 2011;14:53-60.  
42  
43  
44  
45  
46  
47  
48  
49  
50  
51  
52  
53  
54  
55  
56  
57  
58  
59  
60

1  
2  
3  
4  
5  
6  
7  
8  
9  
10  
11  
12  
13  
14  
15  
16  
17  
18  
19  
20  
21  
22  
23  
24  
25  
26  
27  
28  
29  
30  
31  
32  
33  
34  
35  
36  
37  
38  
39  
40  
41  
42  
43  
44  
45  
46  
47  
48  
49  
50  
51  
52  
53  
54  
55  
56  
57  
58  
59  
60

## Development of an Economic Model to Assess the Cost-Effectiveness of Hawthorn Extract as an Adjunct Treatment for Heart Failure in Australia

Emily Ford  
School of Population Health  
University of Queensland  
Brisbane, Australia  
Postal address: PO Box 9122  
Wynnum Plaza Queensland 4178  
[emily.ford1@uqconnect.edu.au](mailto:emily.ford1@uqconnect.edu.au)  
Ph +61 (0)7 3901 1429

Professor Jon Adams  
Professor of Public Health  
Faculty of Nursing, Midwifery and Health  
University of Technology  
Sydney, Australia  
and  
Honorary Professor of Sociology  
School of Social Science  
University of Queensland  
Brisbane  
Australia  
[Jon.adams@uts.edu.au](mailto:Jon.adams@uts.edu.au)

Professor Nicholas Graves  
Professor of Health Economics  
School of Public Health and Institute for Health & Biomedical Innovation  
Queensland University of Technology  
Brisbane, Australia  
[n.graves@qut.edu.au](mailto:n.graves@qut.edu.au)

Keywords: complementary therapies, heart failure, cost-benefit analysis, crataegus extract

Word count: 4546



**ABSTRACT****Objective**

An economic model was developed to evaluate the cost-effectiveness of hawthorn extract as an adjunctive treatment for heart failure in Australia.

**Methods**

A Markov model of chronic heart failure was developed to compare the costs and outcomes of standard treatment and standard treatment with hawthorn extract. Health states were defined by the New York Heart Association (NYHA) classification system and death. For any given cycle patients could remain in the same NYHA class, experience an improvement or deterioration in NYHA class, be hospitalised or die. Model inputs were derived from the published medical literature, and the output was Quality Adjusted Life Years (QALYs). Probabilistic Sensitivity Analysis was conducted. The Expected Value of Perfect Information (EVPI) and the Expected Value of Partial Perfect Information (EVPPPI) were conducted to establish the value of further research and the ideal target for such research.

**Results**

Hawthorn extract increased costs by \$1866.78 and resulted in a gain of 0.02 QALYs. The incremental cost-effectiveness ratio was \$85,160.33 per QALY. The CEAC indicated at a threshold of \$40,000 the new treatment had a 0.29 probability of being cost-effective. The average incremental NMB was -\$1791.64, the average NMB for the standard treatment was \$92,067.49, and for hawthorn extract \$90,275.84. Additional research is potentially cost-effective if research is not proposed to cost more than \$325 million. Utilities is the most important target parameter group for further research.

**Conclusions**

Hawthorn extract is not currently considered to be cost-effective in as an adjunctive treatment for heart failure in Australia. Further research in the area of utilities is warranted.

## INTRODUCTION

Heart failure is a major public health concern for all Western countries<sup>1</sup>. In the United States and Europe it is the most common principal diagnosis for adults admitted to hospital aged 65 years and over. In the United States around 2% of the population have heart failure (approximately 5 million people), and each year there are 500,000 new cases diagnosed<sup>2</sup>. The estimated prevalence in Sweden is 1.5-2%, approximately 135,000 to 180,000 people<sup>3</sup>.

Australian data regarding the public health significance and epidemiology of heart failure is currently limited. Estimates rely on information from large-scale population studies conducted in the United States and Europe<sup>1</sup>. It is estimated there are approximately 300,000 Australians living with chronic heart failure, and approximately 30,000 new cases diagnosed each year, with incidence rates and prevalence rising significantly with age<sup>4,5</sup>. In Australia, chronic cardiovascular diseases are associated with health care costs of over five billion dollars, and estimates put the cost of heart failure at around one billion dollars<sup>6</sup>. The mortality, morbidity and health care costs of heart failure are therefore significant<sup>4</sup>.

Heart failure is a syndrome with a range of signs and symptoms, diagnosis is based on such signs and symptoms, including dyspnoea and fatigue, and appropriate investigations, such as echocardiogram, which confirm the presence or absence of heart failure and help determine its aetiology<sup>1</sup>.

Current treatment aims to relieve and stabilise symptoms and prolong survival by stopping, stabilizing or reversing the progression of heart failure<sup>7</sup>. There are a variety of strategies used in Australia, including non-pharmacological management, pharmacological management, lifestyle changes, and the use of supportive devices, surgery, and palliative care<sup>6,8</sup>. The pharmacological approach depends on the type of heart failure and extent of the symptoms.

Despite the availability of strategies to treat and manage the chronic disease, the disability and suffering associated with heart failure is devastating<sup>7</sup>. Given this, and the large economic burden, it is reasonable to examine options not currently

1  
2  
3  
4  
5  
6 considered standard therapy. Research examining the use of complementary and  
7 alternative medicine, particularly the use of hawthorn extract is showing promising  
8 results.  
9

10  
11 Hawthorn extract is a popular herbal medicine used worldwide, particularly for its  
12 cardiovascular properties<sup>9</sup>. Hawthorn extract has positive inotropic, anti-  
13 inflammatory and anti-oxidative properties; causes peripheral and coronary  
14 vasodilation; and protects against ischaemia induced arrhythmias<sup>9</sup>. A recent  
15 systematic review concluded hawthorn extract can provide significant benefits to  
16 heart failure patients as an adjunct to conventional treatment and a recent cost-  
17 effectiveness study conducted in Germany concluded hawthorn is a cost-effective  
18 treatment option especially in the early stages of heart failure<sup>10-12</sup>.  
19  
20  
21  
22  
23

24  
25 Economic evaluation is a structured method for examining the costs and  
26 consequences involved with alternative methods of treatments and/or programs, in  
27 order to inform which is the best alternative from a particular viewpoint<sup>13</sup>. The goal  
28 is to improve the use of health care resources and improve patient care<sup>14</sup>. When  
29 conducted rigorously, such formal analysis allows recommendation to be made with  
30 transparency regarding the methods, data sources and assumptions<sup>13</sup>. This further  
31 allows the process to be replicated, reviewed and even challenged.  
32  
33  
34  
35

36  
37 Models allow complex situations to be organised into a single coherent form that can  
38 be used to make decisions based on comprehensive consideration of the alternative  
39 interventions by capturing the essential relationships between the factors included in  
40 the model and outcomes<sup>15 16</sup>. Markov models define diseases using clinically  
41 relevant and economically important health states, between which patients move  
42 based on the natural history of the disease, and to which cost and effectiveness  
43 outcomes are ascribed<sup>16</sup>.  
44  
45  
46  
47

48  
49 There are numerous examples of cost-effectiveness modeling in heart failure that  
50 examine conventional medicine. Pharmacological, behavioural and surgical  
51 interventions have all been investigated and many found to be cost-effective<sup>17 18</sup>.  
52 Pharmacological agents that have cost-effectiveness evidence include angiotensin  
53 converting enzyme inhibitors (ACEIs), digoxin, and beta-blockers such as carvedilol  
54  
55  
56  
57  
58  
59  
60

1  
2  
3  
4  
5  
6 and nebivolol. Multidisciplinary heart failure management, in the form of a team,  
7 usually made up of a nurse co-ordinator and support from medical staff and allied  
8 health including dieticians and physiotherapy, has also shown to be cost-effective  
9 through reductions in hospitalisation and length of stay<sup>17 19</sup>. Surgical options  
10 including heart transplant, through intensive education and maximal medical therapy,  
11 have demonstrated a range of cost-effectiveness values. Cardiac resynchronisation  
12 therapy with or without an implantable cardioverter-defibrillator, has shown to be  
13 cost-effective from a healthcare perspective<sup>17 20</sup>. Most of the recent evidence  
14 involves Markov modeling. ~~The models in any area of health vary in terms of the~~

15 ~~Markov states chosen, for example when representing the severity of heart failure,~~  
16 ~~hospitalisations and NYHA classes of heart failure are both utilised. It is difficult to~~  
17 ~~summarise the multitude of evidence and compare models as different model~~  
18 ~~structures and methods are used, which potentially leads to different outcomes.<sup>21</sup>~~

Formatted: Highlight

19  
20  
21  
22  
23  
24  
25  
26  
27 The increasing number of published health economic evaluations is not yet reflected  
28 in CAM<sup>21 22 23</sup>. A systematic review examined whether CAM demonstrated cost-  
29 effectiveness through economic evaluations<sup>24</sup>. ~~This was based on 56 economic~~  
30 ~~evaluations, 39 full economic evaluations and 14 of appropriate quality for further~~  
31 ~~assessment.~~ There was good evidence for the cost-effectiveness of several therapies  
32 in comparison to usual care, acupuncture for migraine, manual therapy for neck pain,  
33 spa therapy for Parkinson's, self-administered stress management for cancer patients  
34 undergoing chemotherapy, pre- and post-operative oral nutritional supplementation  
35 for lower gastrointestinal tract surgery, biofeedback for patients with "functional"  
36 disorders (eg, irritable bowel syndrome), and guided imagery, relaxation therapy, and  
37 a potassium rich diet for cardiac patients. ~~There were a number of therapies that~~  
38 ~~were cost effective compared to usual care, and evidence to suggest CAM could be~~  
39 ~~cost effective as a complement to usual care.<sup>24</sup>~~

40  
41  
42  
43  
44  
45  
46  
47  
48 ~~It has been several years since this review, but a literature search suggests the~~  
49 ~~situation today is similar. It is possible to identify economic evaluation of CAM,~~  
50 ~~however there remain very few full economic evaluations today. One An example~~  
51 ~~of such an evaluation, is a study examining therapeutic massage, exercise, and~~  
52 ~~lessons in the Alexander technique for treating persistent back pain<sup>25 6</sup>. Costs~~  
53 ~~included those to the National Health Service (NHS) and to participants. Outcome~~  
54  
55  
56  
57  
58  
59  
60

1  
2  
3  
4  
5  
6 ~~measures included the Roland Morris disability score, days in pain, and quality~~  
7 ~~adjusted life years (QALYs). Results included incremental cost effectiveness ratios~~  
8 ~~and cost effectiveness acceptability curves.~~ Massage, lessons in the Alexander  
9 technique, and an exercise prescription all provided benefits to patients over a 12-  
10 month period. ~~A series of~~ six lessons in the Alexander technique combined with an  
11 exercise prescription was the most ~~effective and~~ cost effective option for the NHS <sup>25,6</sup>.

12  
13  
14  
15  
16 Some economic evaluations of CAM have incorporated decision modeling. ~~RA~~  
17 ~~recently, study examined~~ the cost-effectiveness of adding acupuncture to usual care  
18 for chronic low back pain ~~; was examined from a societal perspective~~, using a Markov  
19 model <sup>26,7</sup>. ~~The is led to a gain of 0.13 QALYs at an incremental cost of KRW~~  
20 ~~459,637, result wasting in~~ an incremental cost per QALY gained of KRW 3,421,394,  
21 well below the ~~recommended~~ threshold ~~of based on the per capita gross domestic~~  
22 ~~product in Korea (KRW 20,000,000). Acupuncture plus usual care was more~~  
23 ~~cost-effective than usual care for these patients.~~ The probability of collaborative  
24 treatment being cost-effective was 72.3%. ~~The~~ EVPI analysis suggested further  
25 research ~~to reduce the uncertainty around the cost-effectiveness of collaborative~~  
26 ~~treatment~~ was of reasonable value. ~~The authors concluded~~ <sup>26</sup>. ~~This highlights the need~~  
27 ~~for full economic evaluations in many areas of CAM.~~

28  
29  
30  
31  
32  
33  
34  
35  
36 The aim of this study was the construction and application of an economic decision  
37 model to evaluate hawthorn treatment as an adjunct to recommended pharmacological  
38 treatment versus recommended pharmacological management for chronic heart failure  
39 in Australia. The analysis has been conducted using a health sector perspective.

## 40 41 42 43 **METHODS**

### 44 45 **Model Description**

46 A four state Markov model of chronic heart failure was developed based on the New  
47 York Heart Association (NYHA) classification system using Microsoft Excel® (see  
48 Figure 1). Classes I to IV make up four discrete health states included in the model  
49 (See Table 1 for a description of the NYHA classes). A decision tree completes the  
50 model. Each NYHA class has its own decision tree. Within the decision tree  
51  
52  
53  
54  
55  
56  
57  
58  
59  
60

1  
2  
3  
4  
5  
6 patients could be hospitalised for worsening heart failure. Patients also either  
7 survived or died.  
8

### 9 10 **Progression through the model**

11 A simulated cohort of 1000 patients aged 60 entered the model with NYHA class II  
12 heart failure and progressed through the model. Patients progress through the model  
13 in one month cycles for a duration of 5 years. After one month, patients either  
14 remained in NYHA class II or improved to NYHA class I or deteriorated.  
15 In turn, for each class of heart failure patients were either hospitalised or not  
16 hospitalised for worsening heart failure. Patients who were hospitalised or not  
17 hospitalised either survived or died. Death was a possibility from any class of heart  
18 failure. The patients accrued costs and benefits of treatment in each of the states for  
19 each cycle.  
20  
21  
22  
23  
24

25  
26  
27 Per patient costs were required for each NYHA class. Costs were assumed to  
28 be the same for standard treatment and standard treatment with hawthorn extract,  
29 except for the additional cost of hawthorn extract. Patient health was considered as a  
30 single index utility on a zero to one scale, where 0 represents death and 1 represents  
31 perfect health. This allows the calculation of Quality Adjusted Life Years (QALYs)  
32 when combined with the mortality data and the calculation of cost per QALY ratios.  
33  
34  
35  
36

37 Two cohorts were modeled, one receiving standard pharmacological treatment and the  
38 other receiving standard pharmacological treatment with hawthorn extract as an  
39 adjunct. The two cohorts will progress through the model in slightly different ways  
40 and as such there will be a difference in the accumulation of costs and QALYS. It is  
41 the differences in costs and QALYS that will determine the cost-effectiveness of  
42 hawthorn extract in addition to standard pharmacological treatment.  
43  
44  
45  
46

47 A discount rate of 3% per year was applied to the costs and benefits. This rate is a  
48 standard choice in the literature.  
49  
50  
51  
52

53 **Table 1. NYHA grading of symptoms in chronic heart failure.**

| 54 NYHA | 55 Description |
|---------|----------------|
|---------|----------------|

|           |                                                                                                                                               |
|-----------|-----------------------------------------------------------------------------------------------------------------------------------------------|
| Class     |                                                                                                                                               |
| Class I   | No symptoms and limitations in ordinary physical activity.                                                                                    |
| Class II  | Slight limitation of physical activity. Ordinary physical activity results in mild symptoms such as fatigue, shortness of breath, and angina. |
| Class III | Marked limitation of physical activity. Less than ordinary physical activity leads to symptoms.                                               |
| Class IV  | Severely limited. Experiences symptoms even at rest.                                                                                          |

## Model Construction

### Disease Progression

Transition probabilities for movement between NYHA classes of heart failure were estimated from the published literature detailing the large scale international Study of the Effects of Nebivolol Intervention on Outcomes and Re-hospitalisation in Seniors with Heart Failure (SENIORS) and personal correspondence with authors<sup>18,27</sup>. A thorough literature search was conducted to identify disease progression data for each NYHA class, [between January 2004 and December 2009](#). Data was considered relevant if transition probabilities were provided for each NYHA class. The databases searched were Medline, CINAHL and the Cochrane Library. Search terms used included 'New York Heart Association', 'NYHA', 'NYHA class', 'class', 'Markov model', 'chronic heart failure', and 'heart failure'.

The search yielded a limited number of studies ([17 in Medline, 3 in CINAHL and 3 in the Cochrane library](#)), of which only the above study was considered suitable for inclusion.

Disease progression between the Markov states was assumed to be the same for standard treatment and for standard treatment with hawthorn extract, as we were unable to identify reliable data to indicate that hawthorn extract altered progression through the classes of heart failure. Transition probabilities were fixed over time. We have incorporated a difference in mortality and a difference in the hospitalisation rate between the standard treatment and the standard treatment with hawthorn extract as an adjunct, which in turn will impact on the cost and QALY outcomes.

### Data Sources

#### Mortality

1  
2  
3  
4  
5  
6 Baseline mortality was derived from Australian Bureau of Statistics general  
7 population mortality data.

8  
9 Mortality data was of interest if it was provided for each NYHA class and if it  
10 concerned the excess mortality from heart failure and/or cardiovascular causes. The  
11 databases searched were Medline, CINAHL and the Cochrane Library, between  
12 January 2004 and December 2009. Search terms used included 'New York Heart  
13 Association', 'NYHA', 'NYHA class', 'class', 'Markov model', 'chronic heart  
14 failure', 'heart failure', 'mortality'. 83 papers were identified in Medline. 198 in  
15 CINAHL and 411 in Cochrane.

16  
17  
18  
19 The mortality rate for cardiovascular causes was derived from the published literature  
20 detailing one-year mortality among unselected patients with NYHA class II-IV heart  
21 failure in Switzerland<sup>28</sup>. The mortality rate increased with progression from NYHA  
22 class I to NYHA class IV, and varied depending on whether the patient was  
23 hospitalised or not. A thorough search of the literature was made to identify data for  
24 each NYHA class individually, nothing was identified and the above study was the  
25 closest to ideal. Hospitalisation was considered a major factor in cost estimation, so  
26 data broken down by hospitalisation status was considered to represent the population  
27 of heart failure patients well. Also, unselected patients were considered to represent  
28 the patient cohort more accurately than studies that focused on hospitalised patients  
29 only. As data for NYHA class I was not included, an assumption was made that  
30 mortality for NYHA class I was the same as the general population mortality.

### 31 32 33 34 35 36 37 38 Health Status

39  
40 Estimates of health status were derived from the same source as the transition  
41 probabilities<sup>18 20</sup>. Data concerning utilities for heart failure is extremely limited, a  
42 study was identified that had specifically had developed utilities for heart failure in  
43 terms of both hospitalisation and NYHA class. However, we were unable to obtain  
44 the required data despite personal correspondence with the authors. The estimated  
45 health status used was considered the next best data source.

46  
47  
48  
49 Health status was assumed to be the same for standard treatment and standard  
50 treatment with hawthorn extract. Hospitalisation was assumed to result in a health  
51 state lower than non-hospitalisation and a -0.1 disutility was applied to hospitalisation  
52 to reflect this.  
53  
54  
55  
56  
57  
58  
59  
60



## Effect of Hawthorn

A literature search identified the existing research for the use of hawthorn extract in the treatment of heart failure, [between January 2004 and January 2010](#). The search included electronic databases (Medline, ~~PubMed~~, ~~CAM on PubMed~~, [\(472 papers\)](#) AMED [\(129 papers\)](#), Econlit [\(0 papers\)](#), ~~DynaMed~~, CINAHL [\(15 papers\)](#), Cochrane Database of Systematic Reviews [\(71 papers\)](#)), hand searches of the literature, including hard copies of journals, and a search of the reference lists of the articles and publications found through electronic and hand searches. Personal communication with authors and experts including manufacturers and researchers in the field was also necessary to identify other sources of information and research that may not have been found using any other methods.

A wide range of search terms was used including: ‘heart failure’, ‘chronic heart failure’, ‘systolic heart failure’, and ‘congestive heart failure’, ‘hawthorn’, ‘Crataegus’, ‘Crataegus oxyacantha’, ‘Crataegus monogyna’, ‘whitethorn’, ‘weissdorn’, ‘Crataegus laevigata’, ‘WS 1442’, ‘LI 132’, ‘complementary’, ‘alternative’, ‘medicine’ and ‘therapy’. There were several studies written in German, these were translated into English and then examined.

Publicly accessible trials registers were also searched, [and information was current up to December 2011](#). The Australian New Zealand Clinical Trials Registry (ANZCTR) was searched, no studies were identified. The World Health Organisation International Clinical Trials Registry Platform was searched, no new relevant trials were identified. The search terms used were: ‘hawthorn extract’, ‘hawthorn’, ‘crataegus’, ‘WS1442’, ‘whitehorn’, ‘heart failure’.

There were no planned exclusion criteria at this stage for the patient population as any of the studies found have the potential to contribute valuable information to inform the model development.

The relative risk of mortality and relative risk of hospitalisation with hawthorn extract was derived from the Survival and Prognosis: Investigation of Crataegus Extract WS 1442 in congestive heart failure (SPICE) trial, a large scale, international, randomised, placebo-controlled, double-blind study designed to investigate the influence of

1  
2  
3  
4  
5  
6 hawthorn extract on mortality of patients with congestive heart failure NYHA class II  
7 and III with at least moderately impaired left ventricular function<sup>29</sup>. To date there  
8 have only been two studies to examine the effect of hawthorn extract on heart failure  
9 progression in terms of mortality and hospitalisation. Most studies have focused on  
10 symptoms and exercise capability. SPICE enrolled 2681 patients, and the Hawthorn  
11 Extract Randomised Blinded Chronic Heart Failure (HERB CHF) trial enrolled 120  
12 patients<sup>30 31</sup>. Meta-analysis was not considered appropriate, therefore the data from  
13 SPICE was incorporated into the model.  
14  
15  
16  
17  
18

### 19 Costs

20 No Australian data was available to estimate the hospitalisation rate and number of  
21 hospitalisations, this information was derived from a United States study<sup>32</sup>.  
22 The estimated length of stay in hospital data was obtained from Victorian Department  
23 of Health for 2010-2011, it was unavailable for each NYHA class, so it was assumed  
24 to be the same for all classes<sup>33</sup>.  
25  
26  
27

28 The cost of a hospital admission per day was derived from the Queensland  
29 Government/ Queensland Health Casemix Funding Model 2008-2009 Component  
30 Prices Summary (\$3,775 per day)<sup>34</sup>.  
31  
32

33 Outpatient costs included General Practitioner (GP) visits, pathology (urea, creatinine,  
34 electrolytes), echocardiograms, and specialist visits. Estimates of the number of GP  
35 and specialist visits came from a combination of Australian sources and overseas  
36 studies due to the difficulty in finding complete Australian estimates. It was  
37 estimated that NYHA class I had 6 GP visits per year, and the remaining NYHA  
38 classes had 12 visits per year at \$34.30 per visit. Pathology was assumed to be  
39 required every 3 months at a cost of \$17.80. An Echocardiogram was assumed to be  
40 performed every two years (\$230.65). A specialist visit was assumed to occur twice  
41 per year (\$290 initial visit, \$194 repeat visit). If hospitalized, it was assumed patients  
42 had an extra 3 specialist visits and 2 GP visits per year. The costs came directly from  
43 the Medicare Benefits Schedule and the Queensland Government/ Queensland Health  
44 Casemix Funding Model 2008-2009 Component Prices Summary<sup>34 35</sup>.  
45  
46  
47  
48  
49

50 The information for which medications are taken for each NYHA class have been  
51 taken from the National Heart Foundation guidelines for the treatment of chronic  
52 heart failure in Australia<sup>5</sup>. Information for the optimal dosages prescribed has been  
53 taken from the Australian Therapeutic Guidelines. Individual drug pricing was  
54  
55  
56  
57  
58  
59  
60

obtained from the most recently available online version of the Medicare Benefits Schedule. The initial version of the model has incorporated the assumption that medications are taken in 100% of patients and that dosing is optimal. The model however can be altered to consider different scenarios of medication prescription and consumption.

The dosage was assumed to be 900mg daily, consistent with the dosage used in the two most recent trials of hawthorn extract, the SPICE trial and the HERB-CHF trial<sup>29</sup><sup>31</sup><sup>36</sup>. An online search was conducted for standardised monopreparations of hawthorn leaf with flower available for purchase. Cardiomax® retails for A\$25.95 [for 30 x 450mg tablets \(this equates to a 15 day supply, the cost for one month is \\$51.90\)](#).

The transition parameters are listed in Table 2. The model parameters have been listed in Table 3. Appendix 1 details the calculation of transition probabilities for the model.

**Table 2. Transition Parameters used in the Decision Model**

| <i>Transition Matrix</i> | NYHA I | NYHA II | NYHA III | NYHA IV | Distribution |
|--------------------------|--------|---------|----------|---------|--------------|
| NYHA I                   | 0.977  | 0.019   | 0.004    | 0.000   | Dirichlet    |
| NYHA II                  | 0.008  | 0.981   | 0.010    | 0.001   | Dirichlet    |
| NYHA III                 | 0.000  | 0.034   | 0.960    | 0.006   | Dirichlet    |
| NYHA IV                  | 0.000  | 0.000   | 0.055    | 0.945   | Dirichlet    |

**Table 3. Parameters used in the Decision Model**

| Probabilistic Parameters                               |                   |                          |              |               |
|--------------------------------------------------------|-------------------|--------------------------|--------------|---------------|
| Parameter Description                                  | Baseline Estimate | Variation/ SE (SD)       | Distribution | Reference     |
| <b>Hospitalisation</b>                                 |                   |                          |              |               |
| Length of stay in hospital estimate                    | 4.9 days          | Alpha 0.1<br>Beta 316.81 | Gamma        | <sup>33</sup> |
| Relative Risk of Hospitalisation with Hawthorn Extract | 1.03651200        | 0.080800494              | Lognormal    | <sup>36</sup> |
| <b>Mortality</b>                                       |                   |                          |              |               |
| Excess Mortality                                       |                   |                          | Beta         | <sup>28</sup> |

|                                                                    |                     |                      |                       |                      |
|--------------------------------------------------------------------|---------------------|----------------------|-----------------------|----------------------|
| probability of excess mortality given hospitalisation class II     | 0.01087776          | Alpha<br>0.35916667  | Beta<br>2.55750000    |                      |
| probability of excess mortality given no hospitalisation class II  | 0.002620782         | Alpha<br>0.43166667  | Beta<br>13.485000     |                      |
| probability of excess mortality given hospitalisation class III    | 0.01791369          | Alpha<br>0.79666667  | Beta<br>3.28666667    |                      |
| probability of excess mortality given no hospitalisation class III | 0.00674466          | Alpha<br>0.72833333  | Beta<br>8.60500000    |                      |
| probability of excess mortality given hospitalisation class IV     | 0.05333974          | Alpha<br>0.96416667  | Beta<br>1.03583333    |                      |
| probability of excess mortality given no hospitalisation class IV  | 0.00719464          | Alpha<br>0.16583333  | Beta<br>1.83416667    |                      |
| <b>Relative Risk of Mortality with Hawthorn Extract</b>            | 0.90336300          | 0.09507420           | Lognormal             | <sup>36</sup>        |
| <b>Utility</b>                                                     |                     |                      | Beta                  | <sup>18</sup>        |
| Utility of NYHA class I no hospitalisation                         | 0.815               | Alpha 395.88         | Beta 89.86            |                      |
| Utility of NYHA class II no hospitalisation                        | 0.72                | Alpha 661.95         | Beta 257.42           |                      |
| Utility of NYHA class III no hospitalisation                       | 0.59                | Alpha 359.8075       | Beta 250.0357         |                      |
| Utility of NYHA class IV no hospitalisation                        | 0.508               | Alpha 51.77          | Beta 50.1394          |                      |
| <b>Fixed Parameters</b>                                            |                     |                      |                       |                      |
| <b>Parameter Description</b>                                       | <b>NYHA class I</b> | <b>NYHA class II</b> | <b>NYHA class III</b> | <b>NYHA class IV</b> |
| <b>Hospitalisation</b>                                             |                     |                      |                       | <sup>32</sup>        |
| Probability for hospitalisation                                    | 0.01518800          | 0.02397800           | 0.02397800            | 0.15397000           |
| Probability no hospitalisation                                     | 0.98481200          | 0.97602200           | 0.97602200            | 0.84603000           |
| <b>Costs</b>                                                       |                     |                      |                       | <sup>34 35 37</sup>  |
| Cost of hospitalisation                                            | \$2,957.08          | \$4,435.63           | \$4,435.63            | \$5,914.17           |

|                                                     |              |              |              |               |
|-----------------------------------------------------|--------------|--------------|--------------|---------------|
| Total cost for each NYHA class with hospitalisation | \$3,141.60   | \$4,639.95   | \$4,684.53   | \$6,176.17    |
| Cost of each class with no hospitalisation          | \$130.30     | \$150.11     | \$194.69     | \$207.79      |
| <b>Mortality</b>                                    |              |              |              | <sup>38</sup> |
| <b>Standardised Death Rate</b>                      | 6.0 per 1000 | 6.0 per 1000 | 6.0 per 1000 | 6.0 per 1000  |

### Probabilistic Sensitivity Analysis

Uncertainty is addressed in the model using probabilistic sensitivity analysis. Statistical distributions were assigned to key model parameters to examine second-order uncertainty in the estimation of the parameter. Uncertainty was propagated through the model using Monte Carlo simulation, drawing parameter values at random 1000 times from the particular distributions. This generates a joint density of cost and QALY outcomes that summarises uncertainty in all model parameters.

### Net Monetary Benefit

The incremental net monetary benefit was calculated. The difference between the average net benefit of the standard treatment and the average net benefit of the standard treatment with hawthorn as an adjunct is equal to the incremental net benefit. The net benefit for each treatment is the increase in effectiveness multiplied by the amount the decision maker is willing to pay per QALY (\$40,000), less the increase in cost.

### The Expected Value of Perfect Information/ Expected Value of Partial Perfect Information (EVPI/ EVPPI)

The results of the modeling will indicate whether, based on the currently available information, the new treatment should be recommended. This decision is always associated with a level of uncertainty, which raises the question of whether it is appropriate to conduct further research to better examine the potential value of the new treatment, and whether we can identify where this research needs to be directed. EVPI and EVPPI analysis have been used to address these questions.

EVPI analysis is a combination of the cost of making the wrong decision in terms of forgone health benefit and wasted resources, and the probability of making a wrong

1  
2  
3  
4  
5  
6 decision. This equates to the expected cost of uncertainty. With all uncertainty  
7 removed there would be economic savings from making the best decision and EVPI is  
8 a monetary value of these savings. EVPI provides an upper bound for spending on  
9 further research that reduces uncertainty in the decision. EVPPI follows the same  
10 principles, but examines individual parameters<sup>39</sup>.

11  
12  
13  
14  
15 For the model it has been assumed the life of technology is 10 years and the number  
16 of eligible patients per annum has been estimated at 30, 000. This estimate is derived  
17 from the estimate of 30, 000 new cases of chronic heart failure per annum.

## 20 21 **RESULTS**

22  
23 For the standard treatment and standard treatment with hawthorn extract as an adjunct  
24 the total cost per patient was \$4,887.82 and \$6754.59 QALYs were 2.40 and 2.42  
25 respectively. This was an incremental cost of \$1866.78 and 0.02 QALYs, and the  
26 incremental cost-effectiveness ratio was \$85,160.33 per QALY. A Cost-  
27 Effectiveness Plane shows the joint density of cost and QALY outcomes from the  
28 Monte Carlo simulations (See [Figure Appendix 2](#)). [In Figure 2, point A is the ICER.](#)  
29 The variation in the model parameters can be seen in a series of histograms for each  
30 of the probabilistic parameters (See Appendix [23](#)).

### 31 32 **Cost-Effectiveness Acceptability Curve (CEAC)**

33  
34  
35  
36  
37 Figure [32](#) shows the uncertainty around this estimate as a cost-effectiveness  
38 acceptability curve (CEAC). At a willingness to pay threshold of \$40,000, the  
39 treatment with hawthorn extract has a 0.29 probability of being cost-effective. The  
40 probability of being cost effective rises as the willingness to pay threshold rises, for a  
41 threshold between \$500,000 and \$1,000,000 the probability is 0.48.

### 42 43 **Net Monetary Benefit (NMB)**

44  
45  
46 For a threshold of \$40,000, the average incremental NMB is -\$1791.64, the average  
47 NMB for the standard treatment is \$92,067.49, and for the standard treatment with  
48 hawthorn as an adjunct \$90,275.84. The treatment with hawthorn extract has a  
49 negative incremental net benefit, and would not offer good value for money for a  
50 decision maker.  
51  
52  
53  
54  
55  
56  
57  
58  
59  
60

### Expected Value of Perfect Information (EVPI)

The population EVPI has been plotted in Figure 43 for a cost-effectiveness threshold between \$0 and \$200, 000 per QALY. The threshold was continued in the analysis up to a threshold of \$500,000 per QALY, however this did not alter the slope of the curve, so the results up to \$200, 000 have been shown.

If the population EVPI represented in Figure 43 exceeds the expected costs of additional research, then it is potentially cost-effective to conduct further research.

At a threshold of \$40,000 additional research is potentially cost-effective if research is not proposed to cost more than \$325 million.

If we proposed additional research would cost \$100 million, it can be seen from Figure 43 that this research would be potentially cost-effective at a threshold of just under \$16,000. Even at a threshold of \$0 per QALY research would potentially be cost-effective as long as the cost of research did not exceed \$15 million.

The EVPI has indicated further research is potentially cost-effective. The Expected Value of Partial Perfect Information (EVPPI) was examined to establish where further research would be of most benefit.

### The Expected Value of Partial Perfect Information (EVPPI)

The EVPPI was examined for six parameters/ groups of parameters, Transitions, Average Length of stay, Excess Mortality (cardiovascular mortality), Relative Risk of Hawthorn, Utilities, and the Relative Risk of Hospitalisation.

The results of the EVPPI analysis can be seen in Figure 54 (and Table 4). From both the table and figure it can be seen that all parameters and parameter groups have significant EVPPI, but the impact varies. Utilities (\$439,471,050.98) has the highest EVPPI, and is therefore the most important target parameter/ parameter group for further research.

### Table 4. Partial EVPI Values for Parameters/ Parameter Groups

| Parameters                    | Partial EVPI     |
|-------------------------------|------------------|
| Transitions                   | \$7,153,571.92   |
| Average Length of stay        | \$96,900,062.41  |
| Excess Mortality              | \$105,833,952.26 |
| Relative Risk Hawthorn        | \$86,323,972.20  |
| Utilities                     | \$439,471,050.98 |
| Relative Risk Hospitalisation | \$56,991,399.70  |

## DISCUSSION

In this modelling study we examined the cost-effectiveness of hawthorn extract in addition to standard treatment for heart failure in Australia. This treatment is not considered cost-effective given the current evidence. This is the first known attempt to examine the cost-effectiveness of hawthorn extract in addition to standard pharmacological treatment of chronic heart failure in Australia. Economic evaluation has been conducted examining hawthorn extract and standard heart failure treatment in Germany and this research indicates hawthorn extract was cost-effective in the study context, however, these studies were not considered rigorous enough for the data to be used in this study<sup>10 40</sup>.

EVPI analysis indicated that further research was likely to be of benefit, and EVPPI analysis indicated that research ideally should be targeted toward Utilities. The potential costs of further research and the particular type or types that may be required are of crucial importance to the final decision. Further research to examine Utilities will likely rely on primary data from randomized controlled trials such as the Eplerenone Post-acute Myocardial Infarction Heart Failure Efficacy and Survival Study (EPHESUS) and the Study of the Effects of Nebivolol Intervention on Outcomes and Rehospitalisation in Seniors with Heart Failure Study (SENIORS)<sup>18 41</sup>. Alternatively such research would require the initiation of novel research with utilities as a main outcome. This is costly research and this would certainly need to be estimated before any research was undertaken.



1  
2  
3  
4  
5  
6 The models in any area of health vary in terms of the Markov states chosen, for  
7 example when representing the severity of heart failure, hospitalisations and NYHA  
8 classes of heart failure are both utilised. It is difficult to summarise the multitude of  
9 evidence and compare models as different model structures and methods are used,  
10 which potentially leads to different outcomes <sup>42</sup>.

11  
12  
13  
14  
15 The literature searches conducted for this study were comprehensive, although not to  
16 the standard of a systematic review. It is also often seen that the keywords chosen for  
17 CAM studies are not always uniform. The combination of these two factors may  
18 mean we have missed some of the research available. Our search was not reliant on  
19 databases alone, much of our information came from personal correspondence and a  
20 thorough search of reference lists, minimizing the impact of the above limitations.

21  
22  
23  
24  
25 A limitation of this study was the relatively sparse data available for the Australian  
26 context. There is scarce data on the incidence and prevalence of heart failure.  
27 Estimates rely on information from a small number of large-scale population studies  
28 conducted in the United States and Europe <sup>1</sup>. The study of mortality in Australia is  
29 complex, heart failure is considered a 'mode of death' not a 'cause of death'. Studies  
30 examining mortality in terms of the underlying cause of death risk underestimating  
31 mortality with condition such as heart failure. Mortality statistics are complicated by  
32 multiple co-morbidities, which make the underlying cause of death difficult to  
33 identify. Lack of consensus about the diagnosis of heart failure also complicates  
34 recording of the cause of death, indeed complicating any examination of heart failure.  
35 It is difficult to isolate costs for heart failure. Heart failure is grouped by the  
36 Australian Institute of Health and Welfare as an 'other cardiovascular disease'. The  
37 exact contribution of heart failure to the burden of cardiovascular disease is at best an  
38 estimate.  
39

40  
41  
42  
43  
44  
45  
46  
47  
48 Another limitation was the availability of evidence of the effectiveness of hawthorn  
49 extract. There are numerous studies supporting its use, however, very few studies that  
50 examine final outcomes such as hospitalisation and mortality<sup>12,30,32</sup>. Previously  
51 conducted studies focus on reported outcomes including maximal workload, exercise  
52 tolerance, pressure-heart rate product, 6-min walk test, and left-ventricular ejection  
53 fraction. There are suggestions in the literature that the use of hawthorn extract can  
54  
55  
56  
57  
58  
59  
60

1  
2  
3  
4  
5  
6 actually decrease the use of standard pharmacological therapy and alter the  
7 progression of heart failure, but little rigorous evidence to support this <sup>10</sup>. If the use of  
8 standard pharmaceuticals was decreased, and/or disease progression was altered and  
9 patients improved their NYHA class to a greater extent or remained in the less  
10 symptomatic classes for longer this would decrease costs and potentially change the  
11 cost-effectiveness in favour of adding hawthorn extract as an adjunct to standard  
12 pharmacological treatment.  
13  
14  
15

16  
17  
18 Should further evidence become available, the model can easily be updated and the  
19 results re-examined.  
20

## 21 **CONCLUSION**

22  
23  
24 Our analysis indicates that based on currently available evidence, hawthorn extract is  
25 not cost-effective in addition to standard pharmacological treatment for chronic heart  
26 failure in Australia. EVPI and EVPPI analysis indicates that further research is  
27 warranted, particularly in the area of utilities, pending an assessment of the estimated  
28 costs of such research.  
29  
30  
31

32  
33 **Funding** This research received no specific grant from any funding agency in the  
34 public, commercial or not-for-profit sectors.  
35  
36

37  
38 **Competing Interests** None.  
39

40  
41 **Contributors** EF, NG and JA were responsible for the conception and design of the  
42 research. EF carried out the data collection and economic analysis. EF was  
43 responsible for the original draft. All authors contributed equally to all other aspects  
44 including drafting and revising, and approved the final manuscript.  
45  
46  
47  
48  
49  
50  
51  
52  
53  
54  
55  
56  
57  
58  
59  
60

## REFERENCES

1. Krum H, Stewart S. Chronic heart failure: time to recognise this major public health problem. *Med J Aust* 2006;184:147-48.
2. McLean AS, Eslick GD, Coats AJS. The epidemiology of heart failure in Australia. *Int J Cardiol* 2007;118:370-74.
3. Agvall B, Borgquist L, Foldevi M, Dahlstrom U. Cost of heart failure in Swedish primary healthcare. *Scand J Prim Health* 2005;23:227-32.
4. Australian Institute of Health and Welfare. Heart failure: what of the future? Cat. No. AUS 34. Canberra: AIHW, 2003.
5. National Heart Foundation of Australia and the Cardiac Society of Australia and New Zealand (Chronic Heart Failure Guidelines Expert Writing Panel). Guidelines for the prevention, detection and management of chronic heart failure in Australia, 2006., 2006.
6. Krum H, Jelinek MV, Stewart S, *et al.* Guidelines for the prevention, detection and management of people with chronic heart failure in Australia in 2006. *Med J Aust* 2006;185:549-56.
7. Kaye DM, Krum H. Drug discovery for heart failure: a new era or the end of the pipeline? *Nat Rev Drug Discov* 2007;6:127-39.
8. Quinn B. Pharmacological treatment of heart failure. *Crit Care Nurs Q* 2007;30:299-306.
9. Furey A, Tassell M. Towards a scientific approach in the assessment of efficacy of an herbal preparation: hawthorn (*Crataegus* spp.). *Eur J Heart Fail* 2008;10:1153-57.

- 1  
2  
3  
4  
5  
6 10. Habs M. Prospective, comparative cohort studies and their contribution to the  
7  
8 benefit assessments of therapeutic options: heart failure treatment with and  
9  
10 without hawthorn special extract WS 1442. *Forsch Komp Klas Nat*  
11  
12 2004;11:36-39.
- 13  
14 11. Pittler MH, Schmidt K, Ernst E. Hawthorn extract for treating chronic heart  
15  
16 failure: meta-analysis of randomised trials. *Am J Med* 2003;114:665-74.
- 17  
18 12. Guo R, Pittler MH, Ernst E. Hawthorn extract for treating chronic heart failure  
19  
20 (Review). *Cochrane Database Syst Rev* 2009; Issue 1. Art No: CD005312.  
21  
22 DOI: 10.1002/14651858.CD005312.pub2.
- 23  
24 13. Griffin S, Claxton K, Sculpher M. Decision analysis for resource allocation in  
25  
26 health care. *J Health Serv Res Po* 2008; 13:23-30.
- 27  
28 14. Kymes S. An introduction to decision analysis in the economic evaluation of the  
29  
30 prevention and treatment of vision-related diseases. *Ophthal Epidemiol*  
31  
32 2008;15:76-83.
- 33  
34 15. Buxton MJ, Drummond MF, Van Hout BA, *et al.* Modelling in economic  
35  
36 evaluation: an unavoidable fact of life. *Health Econ* 1997;6:217-27.
- 37  
38 16. Spencer M, Briggs A, Grossman R, *et al.* Development of an economic model to  
39  
40 assess the cost effectiveness of treatment interventions for chronic obstructive  
41  
42 pulmonary disease. *Pharmacoeconomics* 2005;23:619-37.
- 43  
44 17. Rich MW, Nease RF. Cost-effectiveness analysis in clinical practice: the case of  
45  
46 heart failure *Arch Intern Med* 1999;159:1690-700.
- 47  
48 18. Yao G, Freemantle N, Flather M, *et al.* Long-term cost-effectiveness analysis of  
49  
50 nebivolol compared with standard care in elderly patients with heart failure: an  
51  
52 individual patient-based simulation model. *Pharmacoeconomics* 2008;26:879-  
53  
54 89.

- 1  
2  
3  
4  
5  
6 19. Miller G, Randolph S, Forkner E, *et al*. Long-term cost-effectiveness of disease  
7 management in systolic heart failure. *Med Decis Making OnlineFirst* 2009.  
8  
9  
10 20. Yao G, Freemantle N, Calvert M, *et al*. The long-term cost-effectiveness of  
11 cardiac resynchronization therapy with or without an implantable cardioverter-  
12 defibrillator. *Eur Heart J* 2007;28:42-51.  
13  
14  
15 21. Canter P, Thompson-Coon J, Ernst E. Cost effectiveness of complementary  
16 treatments in the United Kingdom: a systematic review. *Brit Med J*  
17 2005;331:880-81.  
18  
19  
20 22. Dalziel K, Segal L, Mortimer D. Review of Australian health economic evaluation  
21 - 245 interventions: what can we say about cost effectiveness? *Cost Eff Resour*  
22 *Alloc* 2008;6:9.  
23  
24  
25 23. Thompson T, Feder G. Complementary therapies and the NHS: uncertain  
26 evidence of cost effectiveness should not exclude complementary medicine  
27 from reviews and guidelines. *Brit Med J* 2005;331:856-57.  
28  
29  
30 24. Herman P, Craig B, Caspi O. Is complementary and alternative medicine (CAM)  
31 cost-effective? A systematic review. *BMC Complem Altern M* 2005;5:11.  
32  
33  
34 25. Hollinghurst S, Sharp D, Ballard K, *et al*. Randomised controlled trial of  
35 Alexander technique lessons, exercise, and massage (ATEAM) for chronic  
36 and recurrent back pain: economic evaluation. *Brit Med J Online First*  
37 2008;337:a2656.  
38  
39  
40 26. Kim N, Yang B, Lee T, *et al*. An economic analysis of usual care and acupuncture  
41 collaborative treatment on chronic low back pain: a Markov model decision  
42 analysis. *BMC Complem Altern M* 2010;10:274.  
43  
44  
45  
46  
47  
48  
49  
50  
51  
52  
53  
54  
55  
56  
57  
58  
59  
60

- 1  
2  
3  
4  
5  
6 27. Flather M, Shibata M, Coats A, *et al*. Randomised trial to determine the effect of  
7  
8 neбиволол on mortality and cardiovascular hospital admission in elderly  
9  
10 patients with heart failure (SENIORS). *Eur Heart J* 2005;26:215-25.  
11  
12 28. Muntwyler J, Abetel G, Gruner C, *et al*. One-year mortality among unselected  
13  
14 outpatients with heart failure. *Eur Heart J* 2002;23:1861-66.  
15  
16 29. Holubarsch CJF, Colucci WS, Meinertz T, *et al*. Survival and prognosis:  
17  
18 investigation of crataegus extract WS 1442 in congestive heart failure (SPICE)  
19  
20 - rationale, study design and study protocol. *Eur J Heart Fail* 2000;2:431-37.  
21  
22 30. Zick S, Gillespie B, Aaronson K. The effect of crataegus oxycantha special extract  
23  
24 WS 1442 on clinical progression in patients with mild to moderate symptoms  
25  
26 of heart failure. *Eur J Heart Fail* 2008;10:587-93.  
27  
28 31. Zick S, Vautaw B, Gillespie B, *et al*. Hawthorn extract randomised blinded  
29  
30 chronic heart failure (HERB-CHF) trial. *Eur J Heart Fail* 2009;11:990-99.  
31  
32 32. Cowper PA, DeLong ER, Whellan DJ, *et al*. Economic effects of beta-blocker  
33  
34 therapy in patients with heart failure. *Am J Med* 2004;116:104-11.  
35  
36 33. Victorian Department of Health. Victorian health services policy and funding  
37  
38 guidelines 2010-11 technical guidelines. Melbourne: Victorian Department of  
39  
40 Health, 2010.  
41  
42 34. Queensland Health. Casemix funding model 2008-2009: component prices  
43  
44 summary. Brisbane: Queensland Government, 2008.  
45  
46 35. Australian Government Department of Health and Ageing. Medicare Benefits  
47  
48 Schedule (MBS) online. Canberra: Australian Government Department of  
49  
50 Health and Ageing, 2010.  
51  
52  
53  
54  
55  
56  
57  
58  
59  
60

- 1  
2  
3  
4  
5  
6 36. Holubarsch CJF, Colucci WS, Meinertz T, *et al.* The efficacy and safety of  
7  
8 crataegus extract WS 1442 in patients with heart failure: the SPICE trial. *Eur J*  
9  
10 *Heart Fail* 2008;10:1255-63.
- 11  
12 37. Australian Government Department of Health and Ageing. Schedule of  
13  
14 pharmaceutical benefits. Canberra: Australian Government Department of  
15  
16 Health and Ageing, 2010.
- 17  
18 38. Australian Bureau of Statistics. 3302.0 - Deaths, Australia, 2008, 2008.
- 19  
20 39. Drummond MF, Sculpher MJ, Torrance GW, *et al.* *Methods for the economic*  
21  
22 *evaluation of health care programmes*. Third ed. Oxford: Oxford University  
23  
24 Press, 2007.
- 25  
26 40. Koller M, Lorenz W, Aubke W, *et al.* Crataegus special extract WS 1442 in the  
27  
28 treatment of early stages of CHD-associated heart failure *MMW Fortschr Med*  
29  
30 2006;148:42.
- 31  
32 41. Gohler A, Geisler BP, Manne J, *et al.* Utility estimates for decision-analytic  
33  
34 modelling in chronic heart failure: health states based on New York heart  
35  
36 association classes and number of rehospitalisations. *Value Health*  
37  
38 2009;12:185-87.
- 39  
40 42. Turner D, Raftery J, Cooper K, *et al.* The CHD challenge: Comparing four cost-  
41  
42 effectiveness models. *Value Health* 2011;14:53-60.
- 43  
44  
45  
46  
47  
48  
49  
50  
51  
52  
53  
54  
55  
56  
57  
58  
59  
60

1  
2  
3  
4  
5  
6  
7  
8  
9  
10  
11  
12  
13  
14  
15  
16  
17  
18  
19  
20  
21  
22  
23  
24  
25  
26  
27  
28  
29  
30  
31  
32  
33  
34  
35  
36  
37  
38  
39  
40  
41  
42  
43  
44  
45  
46  
47  
48  
49  
50  
51  
52  
53  
54  
55  
56  
57  
58  
59  
60



Figure 1. Markov model and decision tree showing transitions between potential health states for chronic heart failure.

451x317mm (300 x 300 DPI)

View only



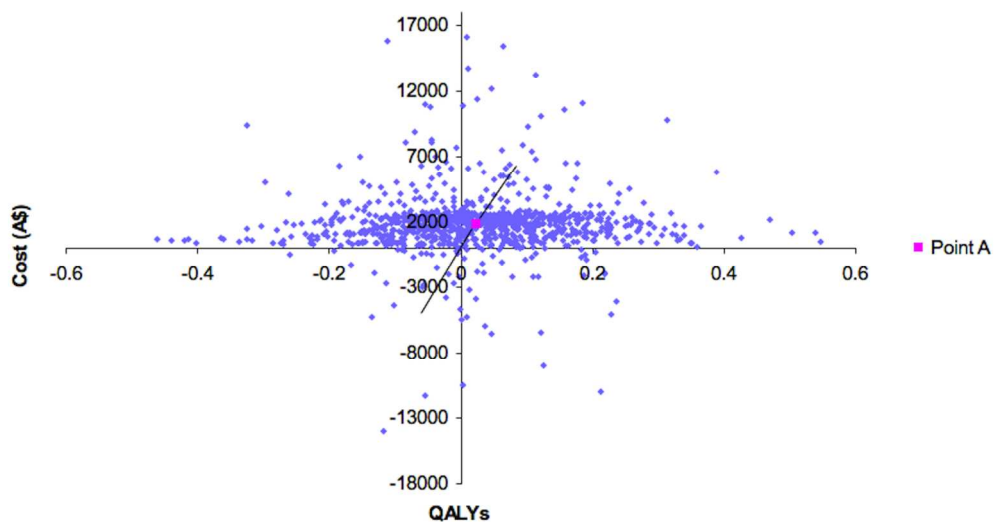

Cost Effectiveness Plane  
150x84mm (300 x 300 DPI)

review only

1  
2  
3  
4  
5  
6  
7  
8  
9  
10  
11  
12  
13  
14  
15  
16  
17  
18  
19  
20  
21  
22  
23  
24  
25  
26  
27  
28  
29  
30  
31  
32  
33  
34  
35  
36  
37  
38  
39  
40  
41  
42  
43  
44  
45  
46  
47  
48  
49  
50  
51  
52  
53  
54  
55  
56  
57  
58  
59  
60

1  
2  
3  
4  
5  
6  
7  
8  
9  
10  
11  
12  
13  
14  
15  
16  
17  
18  
19  
20  
21  
22  
23  
24  
25  
26  
27  
28  
29  
30  
31  
32  
33  
34  
35  
36  
37  
38  
39  
40  
41  
42  
43  
44  
45  
46  
47  
48  
49  
50  
51  
52  
53  
54  
55  
56  
57  
58  
59  
60



Cost Effectiveness Acceptability Curve (CEAC)  
162x90mm (300 x 300 DPI)

review only

1  
2  
3  
4  
5  
6  
7  
8  
9  
10  
11  
12  
13  
14  
15  
16  
17  
18  
19  
20  
21  
22  
23  
24  
25  
26  
27  
28  
29  
30  
31  
32  
33  
34  
35  
36  
37  
38  
39  
40  
41  
42  
43  
44  
45  
46  
47  
48  
49  
50  
51  
52  
53  
54  
55  
56  
57  
58  
59  
60

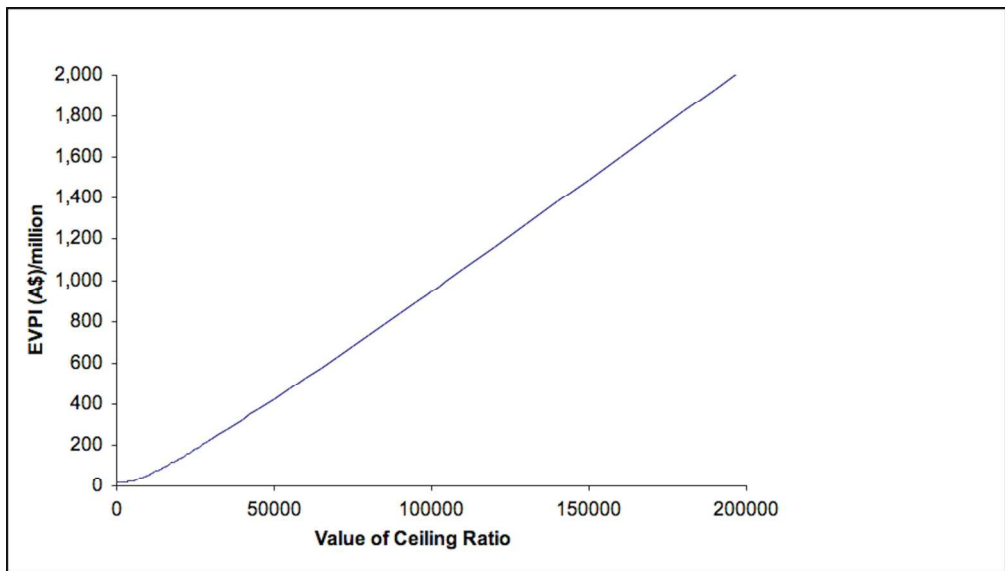

Expected Value of Perfect Information (EVPI)  
161x91mm (300 x 300 DPI)

review only

1  
2  
3  
4  
5  
6  
7  
8  
9  
10  
11  
12  
13  
14  
15  
16  
17  
18  
19  
20  
21  
22  
23  
24  
25  
26  
27  
28  
29  
30  
31  
32  
33  
34  
35  
36  
37  
38  
39  
40  
41  
42  
43  
44  
45  
46  
47  
48  
49  
50  
51  
52  
53  
54  
55  
56  
57  
58  
59  
60

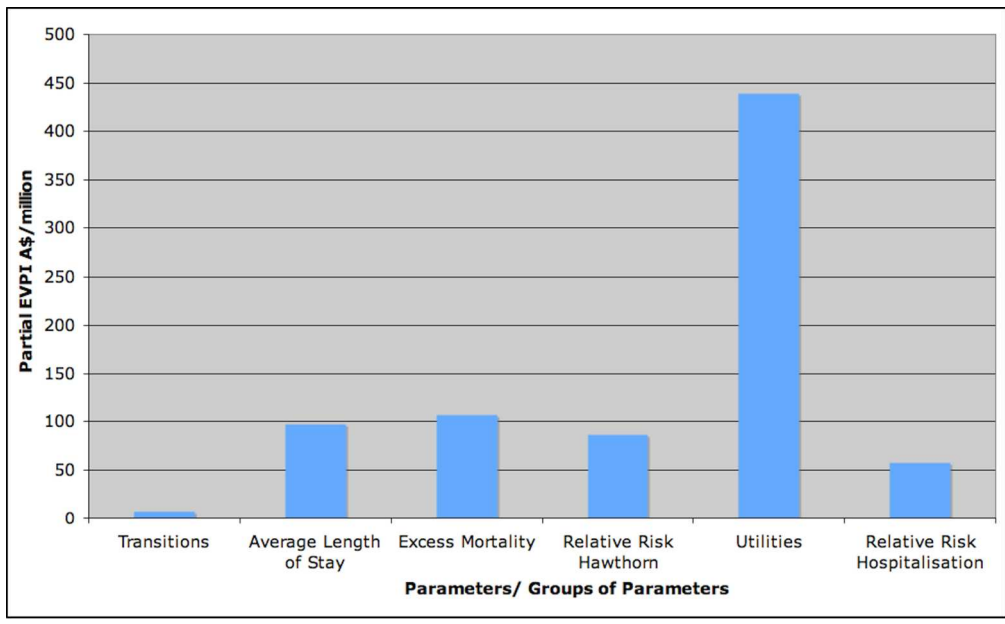

Expected Value of Partial Perfect Information (EVPPi)  
149x91mm (300 x 300 DPI)

Review only

**Appendix 1. Calculation of the Transition Probabilities for the Markov Model**

| <i>transition matrix</i> | NYHA I | NYHA II | NYHA III | NYHA IV | Check |
|--------------------------|--------|---------|----------|---------|-------|
| NYHA I                   | 0.977  | 0.019   | 0.004    | 0.000   | 1.000 |
| NYHA II                  | 0.008  | 0.981   | 0.010    | 0.001   | 1.000 |
| NYHA III                 | 0.000  | 0.034   | 0.960    | 0.006   | 1.000 |
| NYHA IV                  | 0.000  | 0.000   | 0.055    | 0.945   | 1.000 |
|                          |        |         |          |         | 0.000 |

Probabilistic version

1. Observed counts

|          | NYHA I | NYHA II | NYHA III | NYHA IV | totals |
|----------|--------|---------|----------|---------|--------|
| NYHA I   | 59.597 | 1.159   | 0.244    | 0       | 61     |
| NYHA II  | 9.6    | 1177.2  | 12       | 1.2     | 1200   |
| NYHA III | 0      | 28.016  | 791.04   | 4.944   | 824    |
| NYHA IV  | 0      | 0       | 2.365    | 40.635  | 43     |
|          |        |         |          |         | 2128   |

2. Estimated probabilities

|          | NYHA I | NYHA II | NYHA III | NYHA IV | totals |
|----------|--------|---------|----------|---------|--------|
| NYHA I   | 0.977  | 0.019   | 0.004    | 0       | 1      |
| NYHA II  | 0.008  | 0.981   | 0.010    | 0.001   | 1      |
| NYHA III | 0      | 0.034   | 0.960    | 0.006   | 1      |
| NYHA IV  | 0      | 0       | 0.055    | 0.945   | 1      |

3. Random number table

|          | NYHA I | NYHA II | NYHA III | NYHA IV |
|----------|--------|---------|----------|---------|
| NYHA I   | 0.24   | 0.44    | 0.87     | 0.66    |
| NYHA II  | 0.91   | 0.62    | 0.99     | 0.21    |
| NYHA III | 0.72   | 0.91    | 0.27     | 0.46    |
| NYHA IV  | 0.26   | 0.18    | 0.92     | 0.46    |

4. Cumulative gamma/normal functions

|          | NYHA I | NYHA II  | NYHA III | NYHA IV | totals |
|----------|--------|----------|----------|---------|--------|
| NYHA I   | 53.905 | 0.730    | 0.568    | 0       | 55     |
| NYHA II  | 13.845 | 1188.106 | 20.983   | 0.342   | 1223   |
| NYHA III | 0      | 35.377   | 773.741  | 4.390   | 814    |
| NYHA IV  | 0      | 0        | 4.735    | 39.593  | 44     |

5. Random dirichlet probabilities

|          | NYHA I | NYHA II | NYHA III | NYHA IV | totals |
|----------|--------|---------|----------|---------|--------|
| NYHA I   | 0.976  | 0.013   | 0.010    | 0       | 1.00   |
| NYHA II  | 0.011  | 0.971   | 0.017    | 0.000   | 1.00   |
| NYHA III | 0      | 0.043   | 0.951    | 0.005   | 1.00   |
| NYHA IV  | 0      | 0       | 0.107    | 0.893   | 1.00   |

### Appendix 3. Histograms of Individual Parameters

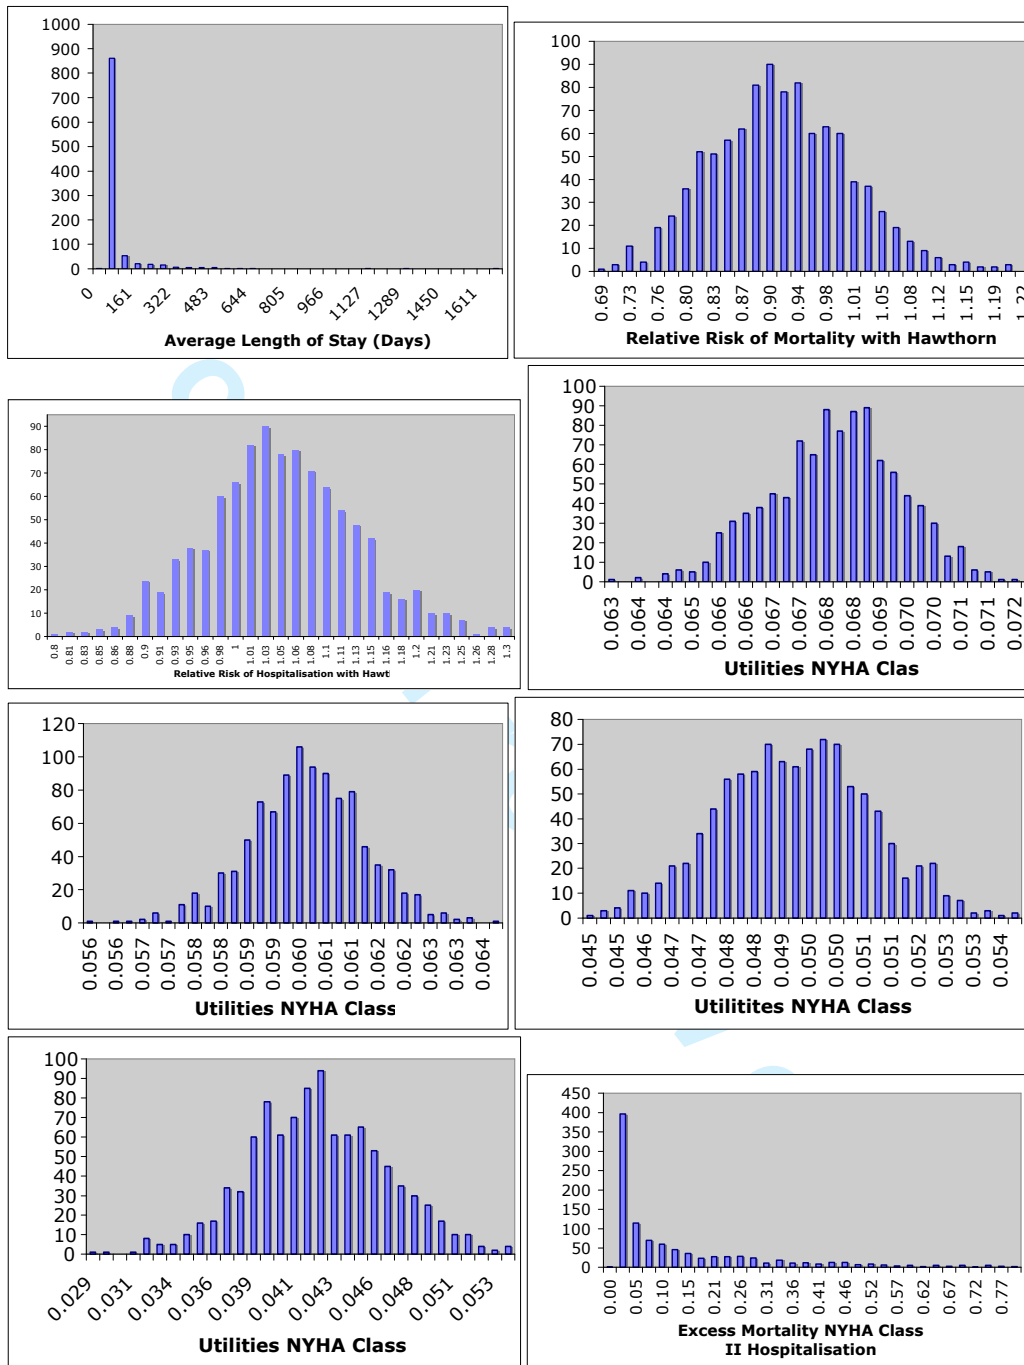

1  
2  
3  
4  
5  
6  
7  
8  
9  
10  
11  
12  
13  
14  
15  
16  
17  
18  
19  
20  
21  
22  
23  
24  
25  
26  
27  
28  
29  
30  
31  
32  
33  
34  
35  
36  
37  
38  
39  
40  
41  
42  
43  
44  
45  
46  
47  
48  
49  
50  
51  
52  
53  
54  
55  
56  
57  
58  
59  
60

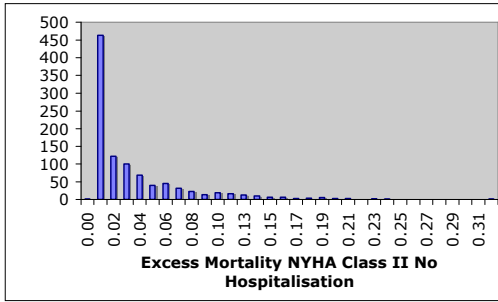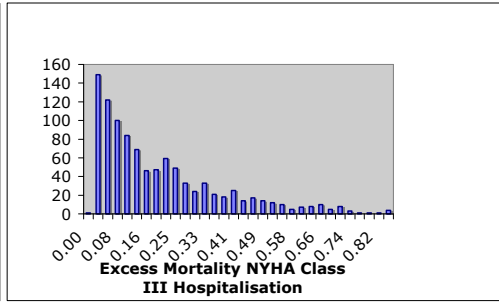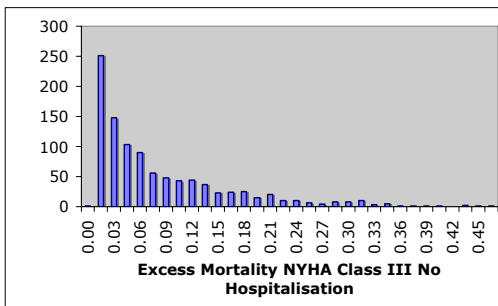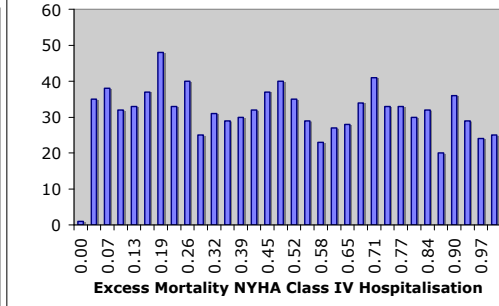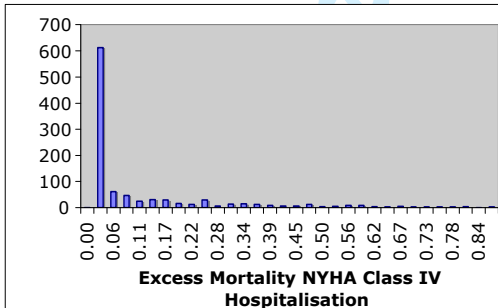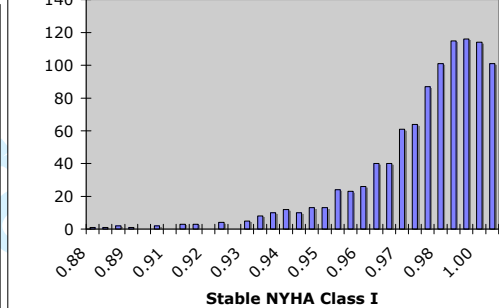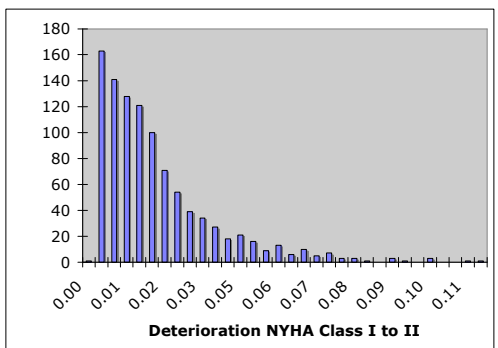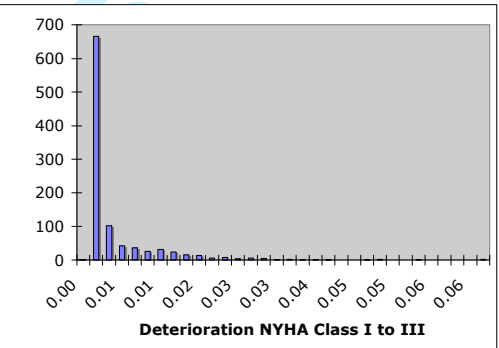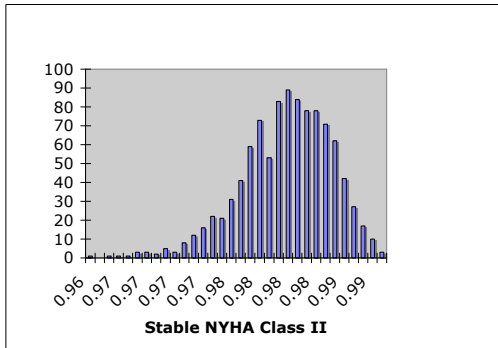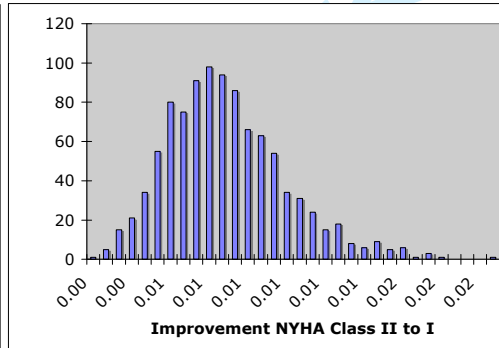

1  
2  
3  
4  
5  
6  
7  
8  
9  
10  
11  
12  
13  
14  
15  
16  
17  
18  
19  
20  
21  
22  
23  
24  
25  
26  
27  
28  
29  
30  
31  
32  
33  
34  
35  
36  
37  
38  
39  
40  
41  
42  
43  
44  
45  
46  
47  
48  
49  
50  
51  
52  
53  
54  
55  
56  
57  
58  
59  
60



View Only



## EVEREST Statement: Checklist for health economics paper

|                                                                                                                                                | Study section            | Additional remarks                          |
|------------------------------------------------------------------------------------------------------------------------------------------------|--------------------------|---------------------------------------------|
| <b>Study design</b>                                                                                                                            |                          |                                             |
| (1) The research question is stated                                                                                                            | Introduction             |                                             |
| (2) The economic importance of the research question is stated                                                                                 | Introduction             |                                             |
| (3) The viewpoint(s) of the analysis are clearly stated and justified                                                                          | Introduction             |                                             |
| (4) The rationale for choosing the alternative programmes or interventions compared is stated                                                  | Introduction             |                                             |
| (5) The alternatives being compared are clearly described                                                                                      | Introduction;<br>Methods |                                             |
| (6) The form of economic evaluation used is stated                                                                                             | Introduction;<br>Methods |                                             |
| (7) The choice of form of economic evaluation is justified in relation to the questions addressed                                              | Methods;<br>Discussion   |                                             |
|                                                                                                                                                |                          |                                             |
| <b>Data collection</b>                                                                                                                         |                          |                                             |
| (8) The source(s) of effectiveness estimates used are stated                                                                                   | Methods                  | Presented in table form and in written form |
| (9) Details of the design and results of effectiveness study are given (if based on single study)                                              | N/A                      | Data derived from multiple sources          |
| (10) Details of the method of synthesis or meta-analysis of estimates are given (if based on an overview of a number of effectiveness studies) | N/A                      | Meta-analysis was not used                  |
| (11) The primary outcome measure(s) for the economic evaluation are clearly stated                                                             | Methods                  |                                             |
| (12) Methods to value health states and other benefits are stated                                                                              | Methods                  |                                             |
| (13) Details of the subjects from whom valuations were obtained are given                                                                      | N/A                      |                                             |
| (14) Productivity changes (if included) are reported separately                                                                                | N/A                      |                                             |
| (15) The relevance of productivity changes to the study question is discussed                                                                  | N/A                      |                                             |
| (16) Quantities of resources are reported separately from their unit costs                                                                     | Methods                  |                                             |
| (17) Methods for the estimation of quantities and unit costs are described                                                                     | Methods                  |                                             |
| (18) Currency and price data are recorded                                                                                                      | Methods                  |                                             |
| (19) Details of currency of price adjustments for                                                                                              | NA                       | As the study is                             |

|                                                                                          |                                           |                                                                                                |
|------------------------------------------------------------------------------------------|-------------------------------------------|------------------------------------------------------------------------------------------------|
| inflation or currency conversion are given                                               |                                           | looking for relative cost, then inflation would be comparable between the different treatments |
| (20) Details of any model used are given                                                 | Methods                                   |                                                                                                |
| (21) The choice of model used and the key parameters on which it is based are justified  | Methods                                   |                                                                                                |
|                                                                                          |                                           |                                                                                                |
| <b>Analysis and interpretation of results</b>                                            |                                           |                                                                                                |
| (22) Time horizon of costs and benefits is stated                                        | Methods-Model construction;<br>Discussion | Based on current cost estimates                                                                |
| (23) The discount rate(s) is stated                                                      | Methods                                   |                                                                                                |
| (24) The choice of rate(s) is justified                                                  | N/A                                       |                                                                                                |
| (25) An explanation is given if costs or benefits are not discounted                     | N/A                                       |                                                                                                |
| (26) Details of statistical tests and confidence intervals are given for stochastic data | N/A                                       |                                                                                                |
| (27) The approach to sensitivity analysis is given                                       | Methods                                   |                                                                                                |
| (28) The choice of variables for sensitivity analysis is justified                       | Methods                                   |                                                                                                |
| (29) The ranges over which the variables are varied are stated                           | Methods, Table 2                          |                                                                                                |
| (30) Relevant alternatives are compared                                                  | Methods                                   |                                                                                                |
| (31) Incremental analysis is reported                                                    | Results                                   |                                                                                                |
| (32) Major outcomes are presented in a disaggregated as well as aggregated form          | Results                                   |                                                                                                |
| (33) The answer to the study question is given                                           | Results<br>Discussion;<br>Conclusion      |                                                                                                |
| (34) Conclusions follow from the data reported                                           | Discussion;<br>Conclusion                 |                                                                                                |
| (35) Conclusions are accompanied by the appropriate caveats                              | Discussion;<br>Conclusion                 |                                                                                                |
